# Supplementary material for: Synthesis and Characterization of White-Light Luminescent End-Capped Polyimides Based on FRET and Excited State Intramolecular Proton Transfer
Source: Polymers (Basel). 2021 Nov 22;13(22):4050. doi: 10.3390/polym13224050 (PMC8621099; doi:10.3390/polym13224050)
Supplement: Supplementary file 1 [file polymers-13-04050-s001.zip › CIF.cif]

data_global
_audit_creation_date                               2021-04-18
_audit_creation_method                            'by CrystalStructure 4.3'
_audit_update_record                               ?

#==============================================================================
# PROCESSING SUMMARY (IUCr Office Use Only)

_journal_date_recd_electronic                      ?
_journal_date_from_coeditor                        ?
_journal_date_accepted                             ?
_journal_coeditor_code                             ?

#==============================================================================
# SUBMISSION DETAILS

_publ_contact_author_name                         'Shinji ANDO'
_publ_contact_author_email                        'ando.s.aa@m.titech.ac.jp'
_publ_contact_author_fax                          '+81-3-5734-2889'
_publ_contact_author_phone                        '+81-3-5734-2137'
_publ_contact_author_address
;
School of Materials and Chemical Technology, Tokyo Institute of Technology
2-12-1-E4-5 O-okayama, Meguro-ku, Tokyo 152-8852, Japan 
;
_publ_contact_letter
;
    ENTER TEXT OF LETTER
;
_publ_requested_journal                           'ENTER JOURNAL NAME HERE'
_publ_requested_category
                                               'CHOOSE FI FM FO CI CM CO or AD'
_publ_requested_coeditor_name                      ?

#==============================================================================
# TITLE AND AUTHOR LIST

_publ_section_title
;
    ENTER SECTION TITLE
;
_publ_section_title_footnote
;
    ENTER FOOTNOTE TO TITLE OF PAPER
;
loop_
_publ_author_name
_publ_author_footnote
_publ_author_address
' FIRST AUTHORS NAME '
;
  FIRST AUTHORS FOOTNOTES
;
;
  FIRST AUTHORS ADDRESS
;
_publ_section_synopsis
;
    ENTER SYNOPSIS
;

#==============================================================================
# TEXT

_publ_section_abstract
;
    ENTER ABSTRACT
;
_publ_section_comment
;
    ENTER TEXT
;
_publ_section_references
;
    ENTER OTHER REFERENCES

    Rigaku (2018). CrystalStructure. Version 4.3. 
    Rigaku Corporation, Tokyo, Japan.

    Altomare, A., Cascarano, G., Giacovazzo, C. and Guagliardi, A. 
    (1993). J. Appl. Cryst. 26, 343-350.
    SIR92

    Sheldrick, G.M. (2008) SHELXL Version 2014/7, Acta Cryst. A64, 112-122.

    Rigaku (1998). REQAB. 
    Rigaku Corporation, Tokyo, Japan.

;
_publ_section_figure_captions
;
    ENTER FIGURE CAPTIONS
;
_publ_section_exptl_prep
;
    ENTER COMPOUND PREPARATION DETAILS
;
_publ_section_exptl_refinement
;
    ENTER SPECIAL DETAILS OF THE REFINEMENT
;

#==============================================================================
data_Ando210416

#==============================================================================
# CHEMICAL DATA

_chemical_formula_sum                             'C16 H15 F3 N2 O3'
_chemical_formula_moiety                          'C16 H15 F3 N2 O3'
_chemical_formula_weight                           340.30
_chemical_melting_point                            ?

#==============================================================================
# CRYSTAL DATA
_space_group_crystal_system                        triclinic
_space_group_name_H-M_alt                         'P -1'
_space_group_name_Hall                            '-P 1'
_space_group_IT_number                             2
loop_
_space_group_symop_id
_space_group_symop_operation_xyz
1   '+X,+Y,+Z'
2   '-X,-Y,-Z'
#------------------------------------------------------------------------------
_cell_length_a                                     5.1357(13)
_cell_length_b                                     10.360(3)
_cell_length_c                                     14.088(4)
_cell_angle_alpha                                  84.565(7)
_cell_angle_beta                                   82.974(9)
_cell_angle_gamma                                  89.991(9)
_cell_volume                                       740.5(3)
_cell_formula_units_Z                              2
_cell_measurement_reflns_used                      2162
_cell_measurement_theta_min                        3.37
_cell_measurement_theta_max                        27.47
_cell_measurement_temperature                      93
#------------------------------------------------------------------------------
_exptl_crystal_description                         prism
_exptl_crystal_colour                              colorless
_exptl_crystal_size_max                            0.130
_exptl_crystal_size_mid                            0.040
_exptl_crystal_size_min                            0.030
_exptl_crystal_density_diffrn                      1.526
_exptl_crystal_density_meas                        ?
_exptl_crystal_density_method                     'not measured'
_exptl_crystal_F_000                               352.00
_exptl_absorpt_coefficient_mu                      0.131
_exptl_absorpt_correction_type                     multi-scan
_exptl_absorpt_process_details                    'REQAB (Rigaku, 1998)'
_exptl_absorpt_correction_T_min                    0.816
_exptl_absorpt_correction_T_max                    0.996

#==============================================================================
# EXPERIMENTAL DATA

_diffrn_ambient_temperature                        93
_diffrn_radiation_type                            'Mo K\a'
_diffrn_radiation_wavelength                       0.71075
_diffrn_measurement_device_type                   'Rigaku Saturn724'
_diffrn_measurement_method                         \w
_diffrn_detector_area_resol_mean                   7.111
_diffrn_reflns_number                              9064
_diffrn_reflns_av_unetI/netI                       0.0876
_diffrn_reflns_av_R_equivalents                    0.0584
_diffrn_reflns_theta_max                           27.468
_diffrn_reflns_theta_min                           3.372
_diffrn_reflns_theta_full                          25.242
_diffrn_measured_fraction_theta_max                0.992
_diffrn_measured_fraction_theta_full               0.993
_diffrn_reflns_Laue_measured_fraction_max          0.992
_diffrn_reflns_Laue_measured_fraction_full         0.993
_diffrn_reflns_point_group_measured_fraction_max   0.992
_diffrn_reflns_point_group_measured_fraction_full  0.993
_diffrn_reflns_limit_h_min                        -6
_diffrn_reflns_limit_h_max                         6
_diffrn_reflns_limit_k_min                        -13
_diffrn_reflns_limit_k_max                         13
_diffrn_reflns_limit_l_min                        -18
_diffrn_reflns_limit_l_max                         18
_diffrn_standards_number                           0
_diffrn_standards_interval_count                   .
_diffrn_standards_decay_%                          ?
_reflns_number_total                               3362
_reflns_number_gt                                  2126
_reflns_threshold_expression                       F^2^>2.0\s(F^2^)
_reflns_Friedel_coverage          0.000
_reflns_Friedel_fraction_max      .
_reflns_Friedel_fraction_full     .

#==============================================================================
# REFINEMENT DATA

_refine_special_details
;
    Refinement was performed using all reflections. The weighted 
    R-factor (wR) and goodness of fit (S) are based on F^2^.
    R-factor (gt) are based on F. The threshold expression of
    F^2^ > 2.0 sigma(F^2^) is used only for calculating R-factor (gt).
;
_refine_ls_structure_factor_coef                   Fsqd
_refine_ls_R_factor_all                            0.0585
_refine_ls_R_factor_gt                             0.0401
_refine_ls_wR_factor_ref                           0.1007
_refine_ls_wR_factor_gt                            0.0955
_refine_ls_number_restraints                       0
_refine_ls_hydrogen_treatment                      mixed
_refine_ls_number_reflns                           3362
_refine_ls_number_parameters                       220
_refine_ls_goodness_of_fit_ref                     0.898
_refine_ls_weighting_scheme                        calc
_refine_ls_weighting_details
                   'w = 1/[\s^2^(Fo^2^)+(0.0474P)^2^] where P=(Fo^2^+2Fc^2^)/3'
_atom_sites_solution_hydrogens                     geom
_atom_sites_solution_primary                       direct
_atom_sites_solution_secondary                     difmap
_refine_ls_shift/su_max                            0.000
_refine_diff_density_max                           0.26
_refine_diff_density_min                          -0.31
_refine_ls_extinction_method                       none
_refine_ls_extinction_coef                         ?

loop_
_atom_type_symbol
_atom_type_description
_atom_type_scat_dispersion_real
_atom_type_scat_dispersion_imag
_atom_type_scat_source
  'C' 'C'  0.0033 0.0016 
;
International Tables for Crystallography
(Vol. C, Tables 4.2.6.8 and 6.1.1.4)
;
  'H' 'H'  0.0000 0.0000 
;
International Tables for Crystallography
(Vol. C, Table 6.1.1.4)
;
  'F' 'F'  0.0171 0.0103 
;
International Tables for Crystallography
(Vol. C, Tables 4.2.6.8 and 6.1.1.4)
;
  'N' 'N'  0.0061 0.0033 
;
International Tables for Crystallography
(Vol. C, Tables 4.2.6.8 and 6.1.1.4)
;
  'O' 'O'  0.0106 0.0060 
;
International Tables for Crystallography
(Vol. C, Tables 4.2.6.8 and 6.1.1.4)
;

#==============================================================================
# ATOMIC COORDINATES AND THERMAL PARAMETERS

loop_
 _atom_site_label
 _atom_site_type_symbol
 _atom_site_fract_x
 _atom_site_fract_y
 _atom_site_fract_z
 _atom_site_U_iso_or_equiv
 _atom_site_adp_type
 _atom_site_occupancy
 _atom_site_site_symmetry_order  
 _atom_site_calc_flag
 _atom_site_refinement_flags_posn
 _atom_site_refinement_flags_adp
 _atom_site_refinement_flags_occupancy
 _atom_site_disorder_assembly
 _atom_site_disorder_group
F1 F 1.2070(2) 0.82777(11) 0.29480(8) 0.0241(3) Uani 1 1 d . . . . .
F2 F 1.3591(2) 0.99976(11) 0.20822(8) 0.0242(3) Uani 1 1 d . . . . .
F3 F 1.0130(2) 1.01017(11) 0.30948(8) 0.0288(3) Uani 1 1 d . . . . .
O1 O 0.7240(2) 0.56242(11) 0.30168(8) 0.0149(3) Uani 1 1 d . . . . .
O2 O 0.0773(2) 0.38674(12) 0.15307(9) 0.0171(3) Uani 1 1 d . . . . .
O3 O 0.9340(3) 1.00337(12) 0.10799(9) 0.0215(3) Uani 1 1 d . . . . .
N1 N 0.3953(3) 0.44460(14) 0.24604(10) 0.0116(3) Uani 1 1 d . . . . .
N2 N 0.8528(3) 0.79561(14) 0.17745(11) 0.0127(3) Uani 1 1 d . . . . .
H1 H 0.877(4) 0.7454(19) 0.2245(13) 0.015 Uiso 1 1 d . U . . .
C1 C 0.5726(3) 0.54649(17) 0.24264(12) 0.0113(4) Uani 1 1 d . . . . .
C2 C 0.5439(3) 0.63230(16) 0.15482(12) 0.0101(4) Uani 1 1 d . . . . .
C3 C 0.3530(3) 0.58031(16) 0.10770(12) 0.0109(4) Uani 1 1 d . . . . .
C4 C 0.2506(3) 0.45971(17) 0.16645(12) 0.0118(4) Uani 1 1 d . . . . .
C5 C 0.6690(3) 0.74930(16) 0.12132(12) 0.0109(4) Uani 1 1 d . . . . .
C6 C 0.6029(3) 0.81251(17) 0.03519(12) 0.0153(4) Uani 1 1 d . . . . .
H6 H 0.6873 0.8918 0.0090 0.018 Uiso 1 1 calc R U . . .
C7 C 0.4112(4) 0.75755(18) -0.01179(13) 0.0161(4) Uani 1 1 d . . . . .
H7 H 0.3682 0.8012 -0.0701 0.019 Uiso 1 1 calc R U . . .
C8 C 0.2816(3) 0.64203(17) 0.02330(12) 0.0140(4) Uani 1 1 d . . . . .
H8 H 0.1500 0.6070 -0.0090 0.017 Uiso 1 1 calc R U . . .
C9 C 0.3393(3) 0.34205(16) 0.32611(12) 0.0114(4) Uani 1 1 d . . . . .
H9 H 0.2020 0.2833 0.3086 0.014 Uiso 1 1 calc R U . . .
C10 C 0.5810(3) 0.26021(17) 0.34093(12) 0.0132(4) Uani 1 1 d . . . . .
H10A H 0.7258 0.3168 0.3535 0.016 Uiso 1 1 calc R U . . .
H10B H 0.6391 0.2181 0.2818 0.016 Uiso 1 1 calc R U . . .
C11 C 0.5190(3) 0.15647(16) 0.42550(12) 0.0133(4) Uani 1 1 d . . . . .
H11A H 0.6809 0.1086 0.4369 0.016 Uiso 1 1 calc R U . . .
H11B H 0.3896 0.0938 0.4094 0.016 Uiso 1 1 calc R U . . .
C12 C 0.4088(3) 0.21637(17) 0.51727(12) 0.0140(4) Uani 1 1 d . . . . .
H12A H 0.3645 0.1467 0.5699 0.017 Uiso 1 1 calc R U . . .
H12B H 0.5432 0.2736 0.5366 0.017 Uiso 1 1 calc R U . . .
C13 C 0.1647(3) 0.29425(17) 0.50078(12) 0.0132(4) Uani 1 1 d . . . . .
H13A H 0.0984 0.3342 0.5600 0.016 Uiso 1 1 calc R U . . .
H13B H 0.0259 0.2358 0.4859 0.016 Uiso 1 1 calc R U . . .
C14 C 0.2260(3) 0.40027(16) 0.41788(12) 0.0128(4) Uani 1 1 d . . . . .
H14A H 0.3536 0.4630 0.4352 0.015 Uiso 1 1 calc R U . . .
H14B H 0.0634 0.4476 0.4065 0.015 Uiso 1 1 calc R U . . .
C15 C 0.9633(3) 0.91510(17) 0.16765(12) 0.0132(4) Uani 1 1 d . . . . .
C16 C 1.1388(3) 0.93714(17) 0.24587(13) 0.0153(4) Uani 1 1 d . . . . .

loop_
 _atom_site_aniso_label
 _atom_site_aniso_U_11
 _atom_site_aniso_U_22
 _atom_site_aniso_U_33
 _atom_site_aniso_U_23
 _atom_site_aniso_U_13
 _atom_site_aniso_U_12
F1 0.0274(6) 0.0230(6) 0.0240(6) 0.0015(5) -0.0141(5) -0.0035(5)
F2 0.0152(6) 0.0289(7) 0.0278(6) -0.0030(5) 0.0004(5) -0.0102(5)
F3 0.0229(6) 0.0380(7) 0.0283(7) -0.0221(6) 0.0000(5) 0.0029(5)
O1 0.0164(7) 0.0141(7) 0.0159(7) -0.0009(5) -0.0097(5) -0.0011(5)
O2 0.0163(7) 0.0195(7) 0.0168(7) -0.0029(5) -0.0068(5) -0.0045(5)
O3 0.0265(8) 0.0159(7) 0.0219(7) 0.0031(6) -0.0056(6) -0.0044(6)
N1 0.0124(7) 0.0116(7) 0.0120(8) 0.0000(6) -0.0069(6) -0.0001(6)
N2 0.0143(8) 0.0112(8) 0.0133(8) 0.0008(6) -0.0056(6) -0.0013(6)
C1 0.0102(8) 0.0109(9) 0.0136(9) -0.0024(7) -0.0033(7) 0.0026(7)
C2 0.0102(8) 0.0107(9) 0.0099(9) -0.0027(7) -0.0025(7) 0.0027(7)
C3 0.0097(8) 0.0128(9) 0.0112(9) -0.0043(7) -0.0024(7) 0.0021(7)
C4 0.0111(9) 0.0152(9) 0.0104(9) -0.0050(7) -0.0035(7) 0.0035(7)
C5 0.0103(8) 0.0117(9) 0.0116(9) -0.0041(7) -0.0030(7) 0.0026(7)
C6 0.0179(9) 0.0139(9) 0.0137(9) 0.0007(7) -0.0016(8) 0.0012(8)
C7 0.0192(10) 0.0180(10) 0.0115(9) 0.0003(7) -0.0052(8) 0.0043(8)
C8 0.0141(9) 0.0171(10) 0.0121(9) -0.0030(7) -0.0059(7) 0.0022(7)
C9 0.0116(8) 0.0101(9) 0.0128(9) -0.0004(7) -0.0027(7) -0.0019(7)
C10 0.0135(9) 0.0122(9) 0.0140(9) -0.0025(7) -0.0019(7) 0.0017(7)
C11 0.0133(9) 0.0099(9) 0.0175(10) -0.0015(7) -0.0039(7) 0.0023(7)
C12 0.0145(9) 0.0147(9) 0.0131(9) 0.0002(7) -0.0042(7) 0.0008(7)
C13 0.0117(9) 0.0161(9) 0.0124(9) -0.0027(7) -0.0024(7) 0.0014(7)
C14 0.0125(9) 0.0121(9) 0.0149(10) -0.0036(7) -0.0040(7) 0.0038(7)
C15 0.0121(9) 0.0135(9) 0.0135(9) -0.0021(7) 0.0011(7) 0.0001(7)
C16 0.0120(9) 0.0159(10) 0.0174(10) -0.0039(8) 0.0022(7) -0.0019(7)

#==============================================================================
_computing_data_collection
                                             'CrystalClear (Rigaku Inc., 2008)'
_computing_cell_refinement                         CrystalClear
_computing_data_reduction                          CrystalClear
_computing_structure_solution
                                               'SIR92 (Altomare, et al., 1994)'
_computing_structure_refinement
                                      'SHELXL Version 2014/7 (Sheldrick, 2008)'
_computing_publication_material
                                          'CrystalStructure 4.3 (Rigaku, 2018)'
_computing_molecular_graphics                     'CrystalStructure 4.3'

#==============================================================================
# MOLECULAR GEOMETRY

_geom_special_details
;
 All esds (except the esd in the dihedral angle between two l.s. planes)
 are estimated using the full covariance matrix.  The cell esds are taken
 into account individually in the estimation of esds in distances, angles
 and torsion angles; correlations between esds in cell parameters are only
 used when they are defined by crystal symmetry.  An approximate (isotropic)
 treatment of cell esds is used for estimating esds involving l.s. planes.
;

loop_
 _geom_bond_atom_site_label_1
 _geom_bond_atom_site_label_2
 _geom_bond_distance
 _geom_bond_site_symmetry_2
 _geom_bond_publ_flag
F1 C16 1.339(2) . ?
F2 C16 1.331(2) . ?
F3 C16 1.3339(19) . ?
O1 C1 1.2281(19) . ?
O2 C4 1.211(2) . ?
O3 C15 1.204(2) . ?
N1 C1 1.387(2) . ?
N1 C4 1.416(2) . ?
N1 C9 1.476(2) . ?
N2 C15 1.350(2) . ?
N2 C5 1.414(2) . ?
N2 H1 0.825(19) . ?
C1 C2 1.476(2) . ?
C2 C3 1.385(2) . ?
C2 C5 1.386(2) . ?
C3 C8 1.386(2) . ?
C3 C4 1.490(2) . ?
C5 C6 1.402(2) . ?
C6 C7 1.401(2) . ?
C6 H6 0.9500 . ?
C7 C8 1.389(3) . ?
C7 H7 0.9500 . ?
C8 H8 0.9500 . ?
C9 C10 1.528(2) . ?
C9 C14 1.529(2) . ?
C9 H9 1.0000 . ?
C10 C11 1.530(2) . ?
C10 H10A 0.9900 . ?
C10 H10B 0.9900 . ?
C11 C12 1.533(2) . ?
C11 H11A 0.9900 . ?
C11 H11B 0.9900 . ?
C12 C13 1.520(2) . ?
C12 H12A 0.9900 . ?
C12 H12B 0.9900 . ?
C13 C14 1.529(2) . ?
C13 H13A 0.9900 . ?
C13 H13B 0.9900 . ?
C14 H14A 0.9900 . ?
C14 H14B 0.9900 . ?
C15 C16 1.539(3) . ?

loop_
 _geom_angle_atom_site_label_1
 _geom_angle_atom_site_label_2
 _geom_angle_atom_site_label_3
 _geom_angle
 _geom_angle_site_symmetry_1
 _geom_angle_site_symmetry_3
 _geom_angle_publ_flag
C1 N1 C4 110.59(14) . . ?
C1 N1 C9 125.64(14) . . ?
C4 N1 C9 123.41(14) . . ?
C15 N2 C5 126.89(15) . . ?
C15 N2 H1 118.8(13) . . ?
C5 N2 H1 113.8(13) . . ?
O1 C1 N1 126.47(16) . . ?
O1 C1 C2 126.52(16) . . ?
N1 C1 C2 107.01(13) . . ?
C3 C2 C5 121.99(15) . . ?
C3 C2 C1 108.66(15) . . ?
C5 C2 C1 129.30(15) . . ?
C2 C3 C8 121.31(17) . . ?
C2 C3 C4 107.45(14) . . ?
C8 C3 C4 131.20(15) . . ?
O2 C4 N1 124.49(16) . . ?
O2 C4 C3 129.24(15) . . ?
N1 C4 C3 106.27(14) . . ?
C2 C5 C6 117.70(15) . . ?
C2 C5 N2 117.06(15) . . ?
C6 C5 N2 125.24(16) . . ?
C7 C6 C5 119.33(17) . . ?
C7 C6 H6 120.3 . . ?
C5 C6 H6 120.3 . . ?
C8 C7 C6 122.78(16) . . ?
C8 C7 H7 118.6 . . ?
C6 C7 H7 118.6 . . ?
C3 C8 C7 116.86(16) . . ?
C3 C8 H8 121.6 . . ?
C7 C8 H8 121.6 . . ?
N1 C9 C10 111.63(14) . . ?
N1 C9 C14 110.60(14) . . ?
C10 C9 C14 111.98(14) . . ?
N1 C9 H9 107.5 . . ?
C10 C9 H9 107.5 . . ?
C14 C9 H9 107.5 . . ?
C9 C10 C11 110.55(14) . . ?
C9 C10 H10A 109.5 . . ?
C11 C10 H10A 109.5 . . ?
C9 C10 H10B 109.5 . . ?
C11 C10 H10B 109.5 . . ?
H10A C10 H10B 108.1 . . ?
C10 C11 C12 111.50(14) . . ?
C10 C11 H11A 109.3 . . ?
C12 C11 H11A 109.3 . . ?
C10 C11 H11B 109.3 . . ?
C12 C11 H11B 109.3 . . ?
H11A C11 H11B 108.0 . . ?
C13 C12 C11 110.42(14) . . ?
C13 C12 H12A 109.6 . . ?
C11 C12 H12A 109.6 . . ?
C13 C12 H12B 109.6 . . ?
C11 C12 H12B 109.6 . . ?
H12A C12 H12B 108.1 . . ?
C12 C13 C14 110.65(14) . . ?
C12 C13 H13A 109.5 . . ?
C14 C13 H13A 109.5 . . ?
C12 C13 H13B 109.5 . . ?
C14 C13 H13B 109.5 . . ?
H13A C13 H13B 108.1 . . ?
C13 C14 C9 110.81(14) . . ?
C13 C14 H14A 109.5 . . ?
C9 C14 H14A 109.5 . . ?
C13 C14 H14B 109.5 . . ?
C9 C14 H14B 109.5 . . ?
H14A C14 H14B 108.1 . . ?
O3 C15 N2 127.79(17) . . ?
O3 C15 C16 118.64(16) . . ?
N2 C15 C16 113.54(15) . . ?
F2 C16 F3 107.46(14) . . ?
F2 C16 F1 107.40(14) . . ?
F3 C16 F1 107.21(15) . . ?
F2 C16 C15 110.98(14) . . ?
F3 C16 C15 109.58(14) . . ?
F1 C16 C15 113.93(15) . . ?

loop_
 _geom_torsion_atom_site_label_1
 _geom_torsion_atom_site_label_2
 _geom_torsion_atom_site_label_3
 _geom_torsion_atom_site_label_4
 _geom_torsion
 _geom_torsion_site_symmetry_1
 _geom_torsion_site_symmetry_2
 _geom_torsion_site_symmetry_3
 _geom_torsion_site_symmetry_4
 _geom_torsion_publ_flag
C4 N1 C1 O1 179.04(16) . . . . ?
C9 N1 C1 O1 5.8(3) . . . . ?
C4 N1 C1 C2 -0.76(18) . . . . ?
C9 N1 C1 C2 -174.01(14) . . . . ?
O1 C1 C2 C3 179.93(16) . . . . ?
N1 C1 C2 C3 -0.27(18) . . . . ?
O1 C1 C2 C5 -2.7(3) . . . . ?
N1 C1 C2 C5 177.13(16) . . . . ?
C5 C2 C3 C8 1.3(3) . . . . ?
C1 C2 C3 C8 178.92(14) . . . . ?
C5 C2 C3 C4 -176.51(14) . . . . ?
C1 C2 C3 C4 1.12(18) . . . . ?
C1 N1 C4 O2 -177.73(16) . . . . ?
C9 N1 C4 O2 -4.3(3) . . . . ?
C1 N1 C4 C3 1.43(18) . . . . ?
C9 N1 C4 C3 174.86(14) . . . . ?
C2 C3 C4 O2 177.54(17) . . . . ?
C8 C3 C4 O2 0.0(3) . . . . ?
C2 C3 C4 N1 -1.56(18) . . . . ?
C8 C3 C4 N1 -179.07(17) . . . . ?
C3 C2 C5 C6 -2.2(2) . . . . ?
C1 C2 C5 C6 -179.34(16) . . . . ?
C3 C2 C5 N2 177.43(15) . . . . ?
C1 C2 C5 N2 0.3(3) . . . . ?
C15 N2 C5 C2 -168.14(16) . . . . ?
C15 N2 C5 C6 11.5(3) . . . . ?
C2 C5 C6 C7 1.6(2) . . . . ?
N2 C5 C6 C7 -178.09(16) . . . . ?
C5 C6 C7 C8 0.1(3) . . . . ?
C2 C3 C8 C7 0.4(2) . . . . ?
C4 C3 C8 C7 177.58(17) . . . . ?
C6 C7 C8 C3 -1.0(3) . . . . ?
C1 N1 C9 C10 -63.2(2) . . . . ?
C4 N1 C9 C10 124.33(16) . . . . ?
C1 N1 C9 C14 62.2(2) . . . . ?
C4 N1 C9 C14 -110.27(17) . . . . ?
N1 C9 C10 C11 178.89(13) . . . . ?
C14 C9 C10 C11 54.27(19) . . . . ?
C9 C10 C11 C12 -55.01(19) . . . . ?
C10 C11 C12 C13 57.13(19) . . . . ?
C11 C12 C13 C14 -57.69(19) . . . . ?
C12 C13 C14 C9 56.89(18) . . . . ?
N1 C9 C14 C13 179.37(13) . . . . ?
C10 C9 C14 C13 -55.43(19) . . . . ?
C5 N2 C15 O3 -2.6(3) . . . . ?
C5 N2 C15 C16 175.32(15) . . . . ?
O3 C15 C16 F2 -44.3(2) . . . . ?
N2 C15 C16 F2 137.60(15) . . . . ?
O3 C15 C16 F3 74.2(2) . . . . ?
N2 C15 C16 F3 -103.88(18) . . . . ?
O3 C15 C16 F1 -165.68(16) . . . . ?
N2 C15 C16 F1 16.2(2) . . . . ?

loop_
_geom_hbond_atom_site_label_D
_geom_hbond_atom_site_label_H
_geom_hbond_atom_site_label_A
_geom_hbond_site_symmetry_D
_geom_hbond_site_symmetry_H
_geom_hbond_site_symmetry_A
_geom_hbond_distance_DA
_geom_hbond_distance_DH
_geom_hbond_distance_HA
_geom_hbond_angle_DHA
_geom_hbond_publ_flag
N2 H1 F1 . . . 2.645(2) 0.825(19) 2.27(2) 108.1(16) no
N2 H1 O1 . . . 2.8728(19) 0.825(19) 2.190(18) 140.3(18) no

#==============================================================================
# Additional structures and associated data_? identifiers
# should be added at this point if there is more than one 
# structure analysis in the CIF.

_shelx_res_file
;

    shelxl.res created by SHELXL-2014/7


TITL Ando210416
CELL  0.71075 5.13570 10.35980 14.08760 84.56490 82.97420 89.99070
ZERR  2 0.00130 0.00290 0.00350 0.00710 0.00860 0.00860
LATT 1
SFAC C H F N O
UNIT 32 30 6 4 6
L.S. 5
FMAP 2
PLAN 25
WPDB -2
HTAB
BOND $H
CONF
LIST 4
TEMP -179.8
ACTA
SIZE 0.130 0.040 0.030
WGHT    0.047400
FVAR       3.98237
F1    3    1.206987    0.827767    0.294801    11.00000    0.02744    0.02298 =
         0.02401    0.00153   -0.01412   -0.00348
F2    3    1.359083    0.999760    0.208217    11.00000    0.01518    0.02892 =
         0.02780   -0.00297    0.00043   -0.01023
F3    3    1.012985    1.010167    0.309481    11.00000    0.02290    0.03800 =
         0.02829   -0.02209   -0.00005    0.00285
O1    5    0.724007    0.562416    0.301677    11.00000    0.01643    0.01412 =
         0.01585   -0.00093   -0.00970   -0.00112
O2    5    0.077320    0.386741    0.153074    11.00000    0.01631    0.01946 =
         0.01682   -0.00289   -0.00684   -0.00449
O3    5    0.933996    1.003365    0.107992    11.00000    0.02651    0.01589 =
         0.02194    0.00314   -0.00562   -0.00444
N1    4    0.395342    0.444599    0.246037    11.00000    0.01243    0.01156 =
         0.01197    0.00003   -0.00694   -0.00012
N2    4    0.852777    0.795606    0.177446    11.00000    0.01429    0.01119 =
         0.01331    0.00081   -0.00555   -0.00126
AFIX   2
H1    2    0.876965    0.745425    0.224498    11.00000   -1.20000
AFIX   0
C1    1    0.572572    0.546491    0.242636    11.00000    0.01021    0.01092 =
         0.01360   -0.00245   -0.00327    0.00260
C2    1    0.543911    0.632303    0.154822    11.00000    0.01025    0.01074 =
         0.00990   -0.00274   -0.00250    0.00265
C3    1    0.353008    0.580307    0.107696    11.00000    0.00965    0.01283 =
         0.01119   -0.00433   -0.00244    0.00214
C4    1    0.250627    0.459714    0.166449    11.00000    0.01107    0.01522 =
         0.01041   -0.00498   -0.00353    0.00354
C5    1    0.669026    0.749296    0.121324    11.00000    0.01031    0.01171 =
         0.01162   -0.00412   -0.00303    0.00257
C6    1    0.602921    0.812509    0.035188    11.00000    0.01794    0.01387 =
         0.01367    0.00072   -0.00157    0.00118
AFIX  43
H6    2    0.687286    0.891803    0.008964    11.00000   -1.20000
AFIX   0
C7    1    0.411247    0.757551   -0.011788    11.00000    0.01919    0.01795 =
         0.01153    0.00026   -0.00523    0.00426
AFIX  43
H7    2    0.368159    0.801161   -0.070121    11.00000   -1.20000
AFIX   0
C8    1    0.281563    0.642026    0.023300    11.00000    0.01405    0.01714 =
         0.01212   -0.00299   -0.00589    0.00224
AFIX  43
H8    2    0.150040    0.606954   -0.009037    11.00000   -1.20000
AFIX   0
C9    1    0.339281    0.342047    0.326107    11.00000    0.01157    0.01011 =
         0.01276   -0.00037   -0.00267   -0.00186
AFIX  13
H9    2    0.202002    0.283270    0.308580    11.00000   -1.20000
AFIX   0
C10   1    0.581020    0.260209    0.340927    11.00000    0.01353    0.01217 =
         0.01404   -0.00250   -0.00187    0.00169
AFIX  23
H10A  2    0.725755    0.316833    0.353507    11.00000   -1.20000
H10B  2    0.639119    0.218106    0.281842    11.00000   -1.20000
AFIX   0
C11   1    0.519022    0.156471    0.425497    11.00000    0.01326    0.00989 =
         0.01745   -0.00155   -0.00394    0.00230
AFIX  23
H11A  2    0.680929    0.108627    0.436860    11.00000   -1.20000
H11B  2    0.389600    0.093777    0.409389    11.00000   -1.20000
AFIX   0
C12   1    0.408751    0.216366    0.517272    11.00000    0.01447    0.01466 =
         0.01314    0.00024   -0.00415    0.00085
AFIX  23
H12A  2    0.364485    0.146724    0.569940    11.00000   -1.20000
H12B  2    0.543248    0.273623    0.536620    11.00000   -1.20000
AFIX   0
C13   1    0.164683    0.294254    0.500785    11.00000    0.01172    0.01607 =
         0.01241   -0.00267   -0.00238    0.00144
AFIX  23
H13A  2    0.098445    0.334223    0.560045    11.00000   -1.20000
H13B  2    0.025928    0.235762    0.485863    11.00000   -1.20000
AFIX   0
C14   1    0.225951    0.400266    0.417885    11.00000    0.01246    0.01207 =
         0.01486   -0.00362   -0.00399    0.00380
AFIX  23
H14A  2    0.353597    0.462966    0.435167    11.00000   -1.20000
H14B  2    0.063446    0.447587    0.406532    11.00000   -1.20000
AFIX   0
C15   1    0.963330    0.915095    0.167647    11.00000    0.01209    0.01347 =
         0.01348   -0.00209    0.00111    0.00010
C16   1    1.138791    0.937142    0.245874    11.00000    0.01202    0.01588 =
         0.01743   -0.00392    0.00221   -0.00195
HKLF 4

REM  Ando210416
REM R1 =  0.0401 for    2126 Fo > 4sig(Fo)  and  0.0585 for all    3362 data
REM    220 parameters refined using      0 restraints

END

WGHT      0.0474      0.0000

REM Instructions for potential hydrogen bonds
HTAB N2 O1
HTAB C6 O3
EQIV $1 -x+2, -y+2, -z
HTAB C6 O3_$1
HTAB C10 O1
HTAB C14 O1
EQIV $2 x-1, y, z
HTAB C14 O1_$2

REM Highest difference peak  0.263,  deepest hole -0.309,  1-sigma level  0.071
Q1    1   1.3083  0.9774  0.3217  11.00000  0.05    0.26
Q2    1   0.6229  0.8220  0.2174  11.00000  0.05    0.26
Q3    1   0.9606  0.9079  0.0264  11.00000  0.05    0.25
Q4    1   0.1401  0.4200  0.0446  11.00000  0.05    0.23
Q5    1   1.1527  0.8029  0.4043  11.00000  0.05    0.23
Q6    1   0.2795  0.5248  0.1322  11.00000  0.05    0.23
Q7    1   0.8596  0.7188  0.3255  11.00000  0.05    0.22
Q8    1   0.0140  0.4581  0.0959  11.00000  0.05    0.22
Q9    1   0.9347  1.0299  0.0037  11.00000  0.05    0.22
Q10   1   0.7623  0.2739  0.2816  11.00000  0.05    0.21
Q11   1   0.7052  0.7401  0.2726  11.00000  0.05    0.21
Q12   1   0.7377  0.6896  0.3380  11.00000  0.05    0.21
Q13   1   0.1785  0.3335  0.2613  11.00000  0.05    0.21
Q14   1   0.5750  0.5952  0.1939  11.00000  0.05    0.20
Q15   1   0.5486  0.6600  0.2774  11.00000  0.05    0.20
Q16   1  -0.1822  0.4962  0.4403  11.00000  0.05    0.20
Q17   1   0.2256  0.0356  0.3616  11.00000  0.05    0.19
Q18   1   0.7235  1.0172  0.3029  11.00000  0.05    0.19
Q19   1   0.3158  0.4860  0.0404  11.00000  0.05    0.19
Q20   1   0.2991  0.3328  0.1114  11.00000  0.05    0.19
Q21   1   0.2870  0.7063 -0.0856  11.00000  0.05    0.19
Q22   1   0.6681  0.6778  0.2846  11.00000  0.05    0.19
Q23   1   0.3019  0.2651  0.2075  11.00000  0.05    0.18
Q24   1   1.0403  0.9179  0.2084  11.00000  0.05    0.18
Q25   1   0.7230  0.7679  0.1407  11.00000  0.05    0.18
;

_shelx_res_checksum    8295

_shelx_hkl_file
;
   0   0   3 6330.24  243.14
   0   0   3 6284.32  270.60
   0   0   3 6898.42  592.42
   0   0  -3 6958.26  370.45
   0   0  -3 5390.31  295.00
   0   0  -3 5533.54  396.43
   0   0   4 3420.56  121.39
   0   0   4 3582.78  159.55
   0   0   4 4114.27  321.70
   0   0  -4 3805.20  221.11
   0   0  -4 3257.87  158.00
   0   0  -4 3507.62  310.34
   0   0   5 5149.57  143.23
   0   0   5 5397.06  200.16
   0   0   5 5693.10  233.63
   0   0  -5 5333.12  173.43
   0   0  -5 4706.90  315.66
   0   0  -5 5341.77  234.29
   0   0   619859.82  787.78
   0   0   619982.14  825.95
   0   0   620978.59  865.09
   0   0  -621446.46  859.30
   0   0  -618418.02  585.67
   0   0  -619071.38  623.92
   0   0   722002.13  873.06
   0   0  -722746.31  914.71
   0   0  -719614.34  842.91
   0   0   8  488.89   68.57
   0   0   8  429.63  166.51
   0   0  -8  410.05  158.06
   0   0  -8  526.57  299.49
   0   0   9  548.06   73.34
   0   0   9  496.86  198.23
   0   0  -9  544.62  266.05
   0   0  -9  493.45  265.24
   0   0  10 2679.73  129.04
   0   0  10 2289.01  276.89
   0   0 -10 2799.36  467.57
   0   0  11 4413.22  284.92
   0   0  11 4755.97  307.81
   0   0  11 4676.47  458.87
   0   0 -11 4867.46  499.64
   0   0  12 4267.67  143.92
   0   0  12 4467.65  400.98
   0   0 -12 5013.34  414.91
   0   0  13   44.94  154.50
   0   0 -13   -0.50  129.30
   0   0  14 1232.85  348.06
   0   0 -14 1398.02  523.16
   0   0  15 7888.69  737.72
   0   0 -15 9439.85  550.11
   0   0  16   24.06  175.16
   0   0 -16   22.64  133.42
   0   0  17  558.59  289.78
   0   0 -17  529.36  601.62
   0   0  18   85.78  236.37
   0   0 -18   14.42  127.62
   0   1 -17   14.79  106.59
   0  -1  17   54.88  162.69
   0   1 -16 2862.30  833.52
   0  -1  16 2747.17  387.55
   0   1 -15 1481.51  678.16
   0  -1  15 1334.57  321.92
   0   1 -14  125.36  205.04
   0  -1  14  138.51  255.57
   0   1 -13  688.82  298.06
   0  -1  13  507.87  262.25
   0   1 -12 2894.84  225.04
   0   1 -12 3743.46  554.38
   0  -1  12 3214.64  339.89
   0   1 -11 4746.72  224.06
   0   1 -11 4998.19  381.48
   0  -1  11 4701.29  178.34
   0  -1  11 4648.80  367.74
   0   1 -1016046.83  304.27
   0   1 -1015228.63  777.78
   0  -1  1015469.70  210.56
   0  -1  1013766.32  643.38
   0   1  -9  328.86  314.27
   0   1  -9  343.36  225.23
   0  -1   9  296.73   77.07
   0  -1   9  259.38  148.92
   0   1  -811108.20  310.03
   0   1  -8 9853.76  427.16
   0  -1   811392.09  255.87
   0  -1   8 9665.15  334.31
   0   1  -7 8359.10  385.26
   0   1  -7 7534.50  573.29
   0  -1   7 8834.42  373.95
   0  -1   7 8556.33  445.82
   0   1  -6 1051.39  187.82
   0   1  -6  941.01  246.27
   0  -1   6  995.27   95.06
   0  -1   6 1069.79  108.70
   0  -1   6 1118.26  178.21
   0  -1   6  848.23  172.13
   0   1  -5 2191.76  185.26
   0   1  -5 1986.28  175.57
   0  -1   5 2199.30  102.11
   0  -1   5 2366.85  125.51
   0  -1   5 2298.96  240.95
   0  -1   5 2035.43  169.38
   0   1  -4   78.81  188.01
   0   1  -4  130.35  220.16
   0  -1   4   76.25  102.79
   0  -1   4  117.88  181.79
   0  -1   4  135.92  144.37
   0  -1   4  100.44  158.52
   0   1  -3 2629.68  266.45
   0   1  -3 2264.02  267.15
   0  -1   3 2527.57  208.70
   0  -1   3 2866.97  143.23
   0  -1   3 2375.92  215.50
   0   1  -238127.94 1058.50
   0   1   230282.69  835.04
   0  -1  -226495.29  736.22
   0   1   3 1225.57  183.67
   0   1   3 1328.71  328.27
   0  -1  -3 1007.51  224.91
   0  -1  -3 1166.38  478.83
   0   1   4 1433.59  145.15
   0   1   4 1484.59  214.21
   0  -1  -4 1097.64  137.25
   0  -1  -4 1212.21  316.37
   0   1   5 1003.90  111.47
   0   1   5 1091.82  190.09
   0  -1  -5  765.71  114.41
   0  -1  -5  838.21  161.77
   0   1   6 4842.81  199.12
   0   1   6 5354.42  293.88
   0  -1  -6 4349.45  225.01
   0  -1  -6 4312.28  346.25
   0   1   7  703.73   88.19
   0  -1  -7  649.28  140.98
   0  -1  -7  782.99  342.38
   0  -1  -8  608.38  145.46
   0  -1  -8  832.88  448.39
   0  -1  -9 3297.76  248.21
   0  -1  -9 3809.59  309.25
   0  -1 -10 1288.20  255.51
   0   1  1110150.99  743.85
   0  -1 -1113745.95 1105.76
   0   1  12 3802.01  355.73
   0  -1 -12 4430.86  349.47
   0   1  13  838.11  341.25
   0  -1 -13  774.21  539.58
   0   1  14  458.55  363.31
   0  -1 -14  430.99  423.54
   0   1  15   84.47  279.64
   0  -1 -15  128.54  213.20
   0   1  16 1150.05  325.33
   0  -1 -16 1198.98  764.25
   0   1  17   71.74  218.52
   0  -1 -17  -11.99  108.44
   0   1  18  123.88  217.02
   0  -1 -18   88.73  162.55
   0   2 -17  256.92  434.59
   0   2 -16  302.33  399.87
   0  -2  16  377.41  242.69
   0   2 -15  481.33  616.29
   0  -2  15  469.54  278.48
   0   2 -14  857.86  356.40
   0  -2  14  850.25  298.78
   0   2 -13  259.32  346.84
   0   2 -13  433.19  518.48
   0  -2  13  394.26  271.50
   0   2 -12  342.95  388.18
   0   2 -12  516.48  584.48
   0  -2  12  497.77  269.72
   0   2 -11 1237.64  177.45
   0   2 -11 1555.83  683.63
   0  -2  11 1357.73  317.86
   0   2 -10 1731.94  339.73
   0   2 -10 1677.91  377.05
   0  -2  10 1739.61  264.21
   0   2  -9  938.99  256.70
   0   2  -9  894.86  344.23
   0  -2   9  916.94  111.74
   0  -2   9  919.29  190.14
   0   2  -8 3959.60  247.43
   0   2  -8 3435.89  381.02
   0  -2   8 3957.75  171.09
   0  -2   8 3532.48  239.25
   0   2  -7 2036.15  210.96
   0   2  -7 1920.00  173.67
   0  -2   7 2158.47  151.14
   0  -2   7 1834.88  188.28
   0   2  -620498.26  854.78
   0   2  -619861.22  848.26
   0  -2   622279.56  906.27
   0  -2   622769.21  923.85
   0  -2   619657.31  837.00
   0   2  -5 3004.86  227.06
   0   2  -5 3308.82  237.72
   0  -2   5 3540.50  160.41
   0  -2   5 3781.64  206.23
   0  -2   5 3917.26  230.00
   0  -2   5 2878.55  184.71
   0   2  -4   38.29  104.59
   0   2  -4   86.71  106.64
   0   2  -4   63.88  116.79
   0  -2   4  121.87  148.23
   0  -2   4   80.47  115.62
   0  -2   4  110.08   78.67
   0   2  -3   86.25  225.12
   0   2  -3  134.13  132.00
   0   2  -3   89.45  104.81
   0  -2   3  176.50  250.51
   0  -2   3   97.39  154.56
   0  -2   3  144.45  117.31
   0   2  -1 3591.45  381.95
   0   2  -1 5842.47  453.77
   0   2  -1 4770.22  310.36
   0  -2   1 4417.96  377.50
   0  -2   1 5407.35  476.90
   0  -2   1 4898.19  371.77
   0   2   0 2303.68  262.85
   0   2   0 3404.25  312.88
   0   2   0 2835.03  191.43
   0  -2   0 2647.44  237.48
   0  -2   0 3095.82  171.86
   0  -2   0 2736.58  279.90
   0   2   146114.28 1312.69
   0   2   141285.70 1184.95
   0  -2  -136549.95 1100.14
   0  -2  -264246.61 1812.12
   0   2   316254.61  397.71
   0   2   317042.26  469.35
   0   2   316218.90  448.02
   0  -2  -313737.13  397.28
   0  -2  -315483.65  429.49
   0  -2  -315854.67  403.30
   0   2   4 5933.85  158.18
   0   2   4 6929.36  327.12
   0   2   4 6485.16  223.47
   0  -2  -4 4941.76  206.85
   0  -2  -4 5522.16  215.92
   0  -2  -4 5745.22  151.33
   0   2   5 1526.33  138.13
   0   2   5 1590.60  181.26
   0  -2  -5 1207.75  122.21
   0  -2  -5 1222.01  160.57
   0  -2  -612782.42  438.45
   0  -2  -614645.44  587.69
   0  -2  -7 3676.26  224.47
   0  -2  -7 3015.70  249.96
   0  -2  -8   44.44   80.56
   0  -2  -8   96.70  154.61
   0  -2  -9 3085.45  225.22
   0  -2  -9 3275.32  292.06
   0  -2 -10  747.15  180.12
   0  -2 -10  798.56  432.17
   0  -2 -11 4832.84  445.75
   0  -2 -11 4188.87  437.26
   0  -2 -12  999.57  441.80
   0   2  13 7283.84  521.59
   0  -2 -13 8119.27  726.91
   0   2  14 2559.05  404.14
   0  -2 -14 2682.19  562.12
   0   2  15 1560.38  462.40
   0  -2 -15 1717.59  361.73
   0   2  16   69.86  274.08
   0  -2 -16   14.66   70.06
   0   2  17   22.89  122.27
   0  -2 -17   -9.37   68.22
   0   2  18  214.29  267.56
   0  -2 -18  215.59  317.16
   0   3 -17 1329.56  503.35
   0  -3  17 1326.91  362.25
   0   3 -16  525.00  723.22
   0  -3  16  750.93  271.92
   0   3 -15  952.36  455.08
   0  -3  15  932.07  283.50
   0   3 -14  757.13  312.42
   0   3 -14  966.78  541.32
   0  -3  14  888.06  295.74
   0   3 -13   23.30   65.58
   0   3 -13   33.93   93.31
   0  -3  13   75.82  165.99
   0   3 -12  363.79  344.92
   0   3 -12  440.87  444.55
   0  -3  12  373.58  243.13
   0   3 -11 1906.84  223.92
   0   3 -11 2274.01  767.69
   0  -3  11 2014.71  314.44
   0   3 -10   88.20  122.69
   0   3 -10   85.38  153.30
   0  -3  10  113.13  210.30
   0   3  -9 4965.25  371.27
   0   3  -9 4107.26  339.39
   0  -3   9 5001.72  351.16
   0   3  -8 2595.30  225.45
   0   3  -8 2222.59  225.04
   0  -3   8 2734.53  266.23
   0   3  -7 3132.34  276.88
   0   3  -7 3263.48  385.51
   0  -3   7 3861.64  275.45
   0   3  -6 2046.57  289.54
   0   3  -6 2192.20  211.44
   0  -3   6 2676.05  183.19
   0  -3   6 2596.65  235.39
   0   3  -5  935.31  176.34
   0   3  -5 1041.27  108.00
   0  -3   5 1069.53  178.98
   0  -3   5  992.93  109.01
   0   3  -3 2303.06  334.32
   0   3  -3 2490.53  130.30
   0  -3   3 2716.02  163.54
   0  -3   3 2416.61  173.87
   0  -3   3 2637.98  185.27
   0  -3   3 2542.73  156.03
   0   3  -2  101.72  143.04
   0   3  -2  129.29  112.31
   0   3  -2   84.61  111.82
   0  -3   2   83.33  129.69
   0  -3   2   79.30  135.34
   0  -3   2  122.78   91.74
   0   3  -1 1529.39  274.95
   0   3  -1 1542.80  288.66
   0   3  -1 1420.53  255.04
   0  -3   1 1397.24  439.76
   0  -3   1 1379.94  255.10
   0  -3   1 1326.85  183.50
   0   3   0 3663.20  450.66
   0   3   0 4115.11  431.98
   0   3   0 4153.76  312.96
   0  -3   0 3835.42  415.49
   0  -3   0 3501.13  342.14
   0  -3   0 3496.36  358.48
   0   3   1 3310.63  279.09
   0   3   1 4227.48  282.07
   0   3   1 4526.15  242.66
   0  -3  -1 3820.09  283.70
   0  -3  -1 3194.62  280.06
   0  -3  -1 3719.98  247.38
   0   3   2 1880.71  192.37
   0   3   2 2247.37  199.65
   0   3   2 2334.46  153.38
   0  -3  -2 1934.39  191.79
   0  -3  -2 1794.13  142.50
   0  -3  -2 2194.71  144.64
   0   3   3 9697.62  353.77
   0   3   310593.29  313.55
   0   3   310697.12  319.26
   0  -3  -3 8651.82  304.96
   0  -3  -3 8633.88  407.52
   0  -3  -3 9811.75  274.83
   0   3   4 4096.75  161.82
   0   3   4 4432.69  202.92
   0   3   4 4595.18  189.78
   0  -3  -4 3854.83  195.40
   0  -3  -4 4180.04  397.48
   0  -3  -4 4402.23  152.81
   0   3   5 1615.72  106.47
   0   3   5 1892.52  205.58
   0   3   5 1999.18  136.93
   0  -3  -5 1544.52  150.24
   0  -3  -5 1672.26  355.31
   0  -3  -5 1894.88   99.67
   0  -3  -6 9419.31  363.17
   0  -3  -6 8309.58  331.77
   0  -3  -7 2586.97  200.81
   0  -3  -7 2715.30  258.49
   0  -3  -8   37.88   86.65
   0  -3  -8   73.00   88.71
   0  -3  -9 7002.01  375.10
   0  -3  -9 6788.78  564.07
   0  -3 -10 1942.26  239.64
   0  -3 -10 1596.62  225.57
   0  -3 -11  796.32  189.92
   0  -3 -11  719.27  371.04
   0  -3 -12  519.60  212.40
   0  -3 -12  569.45  274.10
   0  -3 -13  354.45  222.53
   0   3  14 2224.94  413.56
   0  -3 -14 2277.76  459.96
   0   3  15  689.40  321.39
   0  -3 -15  798.85  402.46
   0   3  16   21.71  175.66
   0  -3 -16   -9.09  139.31
   0   3  17 4080.90  492.52
   0  -3 -17 4229.20  376.25
   0  -4  16  212.04  249.04
   0  -4  15    6.39  100.69
   0   4 -14  469.09  574.33
   0   4 -14  588.66  257.46
   0  -4  14  730.80  256.03
   0   4 -13 1487.58  514.16
   0   4 -13 1481.48  311.53
   0  -4  13 1576.89  314.61
   0   4 -12  843.59  321.58
   0   4 -12  851.82  253.28
   0  -4  12 1028.43  279.00
   0   4 -11 8880.38  624.28
   0   4 -11 9237.64  604.18
   0  -4  1110074.13  680.09
   0   4 -10 3484.25  282.20
   0   4 -10 3322.34  291.55
   0  -4  10 4016.77  399.31
   0   4  -9  118.96  133.92
   0  -4   9  118.71  188.02
   0   4  -8  279.28  308.61
   0  -4   8  217.44  162.98
   0  -4   8  272.18  233.95
   0   4  -7  993.38  352.91
   0  -4   7 1197.22  211.18
   0  -4   7 1447.13  230.96
   0   4  -6 2024.55  234.74
   0   4  -6 2244.72  142.73
   0  -4   6 2670.59  275.11
   0  -4   6 2214.38  213.27
   0   4  -5 8599.50  442.32
   0   4  -5 9188.49  411.69
   0  -4   510229.05  505.72
   0  -4   5 8170.66  431.21
   0   4  -444547.51 1786.92
   0  -4   438371.76 1554.46
   0   4  -3 2104.87  196.95
   0   4  -3 2265.04  144.27
   0  -4   3 2201.22  203.64
   0  -4   3 2130.69  172.89
   0   4  -211040.58  368.49
   0  -4   2 9834.20  332.85
   0   4  -1 5381.72  461.75
   0   4  -1 6378.35  221.71
   0   4  -1 6681.00  251.38
   0  -4   1 5932.94  242.17
   0  -4   1 6348.25  240.38
   0  -4   1 6281.04  238.83
   0   4   0 9312.19  328.82
   0   4   010303.65  297.23
   0   4   010764.31  332.70
   0  -4   0 8826.20  321.63
   0  -4   010147.74  308.83
   0  -4   0 9832.16  308.36
   0   4   1 3284.66  359.29
   0   4   1 4013.28  170.97
   0   4   1 4317.64  191.90
   0  -4  -1 3372.53  186.66
   0  -4  -1 3579.88  191.86
   0  -4  -1 3693.07  160.29
   0   4   2    6.51   37.87
   0   4   2   12.23   81.95
   0   4   2   -5.66   60.87
   0  -4  -2   -1.10   76.38
   0  -4  -2  -33.06   65.96
   0  -4  -2    6.68   60.64
   0   4   3  673.55  190.21
   0   4   3  772.98  113.77
   0   4   3  768.22  111.92
   0  -4  -3  676.59  135.18
   0  -4  -3  740.74  160.90
   0  -4  -3  744.55   87.97
   0   4   413264.36  435.61
   0   4   414429.56  466.42
   0   4   414036.32  462.15
   0  -4  -410941.30  418.15
   0  -4  -411517.19  470.35
   0  -4  -412753.14  384.43
   0   4   5 2084.67  230.49
   0  -4  -5 2232.44  117.94
   0  -4  -5 2037.43  181.15
   0  -4  -5 2102.27  235.70
   0   4   6 8009.75  346.01
   0  -4  -6 8679.81  358.91
   0  -4  -6 6435.06  338.33
   0  -4  -6 7813.34  473.93
   0  -4  -727975.01  509.39
   0  -4  -728004.21  483.57
   0  -4  -728756.86  464.18
   0  -4  -8 3616.59  133.38
   0  -4  -8 3445.16  262.80
   0  -4  -8 3761.23  397.12
   0  -4  -916673.18  459.83
   0  -4  -915631.24  426.81
   0  -4 -10 5022.26  414.42
   0  -4 -10 4311.06  353.64
   0  -4 -11 9943.53  462.55
   0  -4 -11 8168.32  500.13
   0  -4 -12  507.62  225.20
   0  -4 -12  531.31  367.20
   0  -4 -13  -15.75  128.04
   0  -4 -13   29.54  210.27
   0  -4 -14  287.36  206.72
   0   4  15 1548.32  383.56
   0  -4 -15 1523.96  279.73
   0   4  16 3361.05  538.40
   0  -4 -16 3451.95  447.97
   0   4  17 1007.24  304.36
   0  -4 -17 1070.33  531.62
   0  -5  16   -3.34  133.20
   0  -5  16   42.23  146.64
   0  -5  15  240.90  189.27
   0  -5  15  263.94  277.33
   0   5 -14  233.37  253.59
   0  -5  14  368.88  248.54
   0  -5  14  323.87  294.74
   0   5 -13   11.53   49.25
   0  -5  13   31.35  118.39
   0  -5  13    2.35  158.71
   0   5 -12   97.86  156.66
   0  -5  12  171.14  223.96
   0  -5  12  233.11  221.67
   0   5 -11    0.20   58.05
   0  -5  11   28.60  198.77
   0  -5  11   52.26  137.37
   0   5 -10 1494.22  384.02
   0  -5  10 1779.15  332.33
   0  -5  10 1902.42  276.86
   0   5  -9 1185.03  291.57
   0  -5   9 1412.22  324.03
   0  -5   9 1405.54  296.30
   0   5  -8   78.83  165.41
   0  -5   8  195.49  232.13
   0  -5   8   60.76  178.38
   0   5  -7 7950.75  541.70
   0  -5   7 9402.20  501.02
   0  -5   711308.68  572.45
   0   5  -6 2199.14  286.52
   0   5  -6 2315.44  149.01
   0  -5   6 2696.62  291.50
   0  -5   6 2542.08  244.55
   0   5  -5  324.35  403.67
   0   5  -5  295.81   81.43
   0  -5   5  353.75  165.38
   0  -5   5  369.76  192.09
   0   5  -4   25.86   68.02
   0   5  -4   28.16   62.30
   0  -5   4    1.48   68.05
   0  -5   4    1.32   92.09
   0   5  -3  723.49  163.92
   0   5  -3  786.18  107.27
   0  -5   3  786.83  168.75
   0  -5   3  709.56  172.03
   0   5  -2 3068.95  251.36
   0   5  -2 3212.32  191.86
   0  -5   2 3287.92  229.90
   0  -5   2 2933.19  214.31
   0   5  -1 4288.83  461.97
   0   5  -1 5191.07  220.19
   0  -5   1 5561.85  257.74
   0  -5   1 4740.37  249.37
   0   5   061189.14 2433.27
   0   5   070100.17 2753.29
   0  -5   064377.46 2540.24
   0  -5   053127.44 2121.51
   0   5   110301.35  534.81
   0   5   112300.46  387.02
   0  -5  -110945.27  369.32
   0  -5  -1 9470.97  373.96
   0   5   2 2027.80  203.22
   0   5   2 2741.25  170.16
   0  -5  -2 2449.06  153.29
   0  -5  -2 2373.73  199.01
   0  -5  -2 2353.76  199.36
   0   5   3   -3.55   75.73
   0   5   3   -4.02   72.60
   0  -5  -3   13.66   63.42
   0  -5  -3   -3.25   67.22
   0  -5  -3    8.70   90.98
   0   5   4 3672.35  246.61
   0  -5  -4 3692.56  209.40
   0  -5  -4 3587.62  245.94
   0  -5  -4 3383.04  267.06
   0   5   5 1080.05  180.03
   0  -5  -5 1192.03  119.05
   0  -5  -5 1038.46  174.43
   0  -5  -5 1131.62  314.12
   0   5   6 1247.31  152.71
   0  -5  -6 1478.36  111.58
   0  -5  -6 1214.49  179.37
   0  -5  -6 1215.33  272.46
   0   5   7   -0.68   26.02
   0  -5  -7   29.93   53.22
   0  -5  -7   -4.16   84.51
   0  -5  -7   -2.00   57.45
   0   5   813501.28  504.69
   0  -5  -812656.83  451.87
   0  -5  -812073.81  557.32
   0  -5  -811549.45  724.75
   0  -5  -9   11.46   29.76
   0  -5  -9   12.87   32.88
   0  -5  -9   -3.32  110.76
   0  -5  -9   41.00  140.35
   0  -5 -10 7599.51  425.52
   0  -5 -10 6073.43  463.57
   0  -5 -11  786.64  236.73
   0  -5 -11  679.72  440.81
   0  -5 -12 4955.98  379.68
   0  -5 -12 4962.73  564.63
   0  -5 -13   14.87  114.29
   0  -5 -13   23.49   94.50
   0  -5 -14 1637.73  281.16
   0  -5 -14 1932.53  439.40
   0  -5 -15 4217.60  595.95
   0   5  16 1798.56  432.88
   0  -5 -16 2095.23  296.96
   0   5  17  621.10  312.61
   0  -5 -17  668.36  304.73
   0  -6  15  167.84  224.04
   0   6 -14   34.19   88.70
   0  -6  14   28.57  129.65
   0  -6  14   33.99  145.51
   0   6 -13 1480.24  786.75
   0  -6  13 1802.40  349.70
   0  -6  13 1801.75  326.54
   0   6 -12 3639.30  398.33
   0  -6  12 4507.12  514.20
   0  -6  12 4257.16  503.51
   0   6 -11   13.22  136.87
   0  -6  11  -18.41  151.08
   0  -6  11   42.21  105.58
   0   6 -10 3027.41  604.42
   0  -6  10 3753.99  425.60
   0  -6  10 3465.90  350.83
   0   6  -9  823.96  473.72
   0  -6   9  873.48  296.07
   0  -6   9  751.00  197.51
   0   6  -8 6552.66  441.30
   0  -6   8 7640.87  469.29
   0  -6   8 7055.20  376.26
   0   6  -7 1634.32  338.19
   0  -6   7 1755.34  276.96
   0  -6   7 1885.28  230.13
   0   6  -6 1076.44  573.81
   0   6  -6 1162.02  133.51
   0  -6   6 1401.72  205.70
   0  -6   6 1426.20  250.21
   0   6  -5 1078.67  233.07
   0   6  -5 1124.72  118.14
   0  -6   5 1166.45  148.28
   0  -6   5 1333.25  217.09
   0   6  -4 3349.08  319.07
   0   6  -4 3425.66  194.39
   0  -6   4 4057.29  248.74
   0  -6   4 3485.46  265.87
   0   6  -3 1509.33  194.97
   0   6  -3 1649.09  144.79
   0  -6   3 1536.14  147.51
   0  -6   3 1395.07  187.53
   0   6  -2 3780.64  299.07
   0   6  -2 3794.23  194.17
   0  -6   2 4009.63  194.01
   0  -6   2 3870.42  235.84
   0   6  -1 1582.92  291.28
   0   6  -1 1708.83  135.92
   0  -6   1 1847.52  172.36
   0  -6   1 1192.33  202.77
   0   6   0  302.25  335.97
   0   6   0  245.60  112.66
   0  -6   0  216.99  160.93
   0  -6   0  137.12  157.32
   0   6   1  113.75  163.61
   0   6   1   42.83  103.12
   0  -6  -1   49.19  133.54
   0  -6  -1    6.78   88.45
   0   6   2  251.97  285.63
   0   6   2  256.75  108.73
   0  -6  -2  200.05  129.08
   0  -6  -2  266.19  190.35
   0   6   3 3008.10  200.02
   0  -6  -3 3016.07  198.04
   0  -6  -3 3558.03  232.43
   0   6   4 1074.98  202.66
   0  -6  -4 1070.21  193.18
   0  -6  -4 1173.59  335.97
   0   6   5   17.12   55.67
   0  -6  -5   32.37   60.86
   0  -6  -5  -16.36  102.61
   0  -6  -5   60.72   97.30
   0   6   6 3399.66  222.36
   0  -6  -6 3568.33  191.51
   0  -6  -6 3189.17  250.66
   0  -6  -6 3245.14  290.52
   0   6   7  416.07  207.68
   0  -6  -7  413.58   86.59
   0  -6  -7  372.46  190.76
   0  -6  -7  441.63  438.79
   0   6   8 5796.70  429.15
   0  -6  -8 5461.79  354.83
   0  -6  -8 5696.32  488.23
   0  -6  -8 5524.80  637.30
   0   6   9 2518.28  139.12
   0  -6  -9 2550.02  110.96
   0  -6  -9 3021.73  285.97
   0  -6  -9 2556.41  315.34
   0  -6 -10  377.40   50.07
   0  -6 -10  467.85  233.66
   0  -6 -10  429.97  470.20
   0  -6 -11 1790.24  259.54
   0  -6 -11 1581.23  406.96
   0  -6 -12  554.80  246.01
   0  -6 -12  527.86  417.60
   0  -6 -13 1433.16  291.10
   0  -6 -13 1539.33  440.16
   0  -6 -14   -0.61  113.12
   0  -6 -14   -2.26  181.39
   0  -6 -15    2.11  121.09
   0  -6 -15    8.27  200.97
   0  -6 -16  442.33  208.04
   0   7 -14   34.56   99.08
   0  -7  14   26.89  114.38
   0   7 -13  227.22  339.69
   0  -7  13  451.24  242.35
   0   7 -12  419.04  593.88
   0  -7  12  742.02  253.79
   0  -7  12  514.78  183.48
   0   7 -11  710.70  366.97
   0  -7  11 1020.27  352.03
   0  -7  11  739.85  239.51
   0   7 -10 2683.74  502.49
   0  -7  10 3251.74  528.63
   0  -7  10 2747.38  391.21
   0   7  -9 2218.77  343.57
   0  -7   9 2740.37  413.84
   0  -7   9 2310.44  326.78
   0   7  -8 1993.46  670.86
   0  -7   8 2215.29  332.69
   0  -7   8 1959.67  273.58
   0   7  -7 1110.32  626.03
   0  -7   7 1187.38  300.57
   0  -7   7  972.12  207.53
   0   7  -6 6617.22  823.63
   0  -7   6 8058.00  467.38
   0  -7   6 7960.21  366.32
   0   7  -5 8531.34 1038.90
   0   7  -5 8685.54  284.04
   0  -7   5 9584.11  370.76
   0  -7   5 9140.70  669.90
   0   7  -4 1026.61  549.98
   0   7  -4 1136.53  140.94
   0  -7   4 1166.58  165.65
   0  -7   4 1133.35  220.55
   0   7  -3 1362.78  211.84
   0   7  -3 1660.87  149.89
   0  -7   3 1798.76  161.47
   0  -7   3 1827.68  243.24
   0   7  -2   90.51  120.04
   0   7  -2  103.28   86.34
   0  -7   2  136.49  106.86
   0  -7   2   56.52  159.87
   0   7  -1 4492.32  428.17
   0   7  -1 4879.19  254.83
   0  -7   1 5339.03  281.77
   0  -7   1 4504.82  286.77
   0   7   0 4362.49  442.59
   0   7   0 4931.25  256.95
   0  -7   0 5061.20  286.14
   0  -7   0 4606.44  301.90
   0   7   1  549.21  379.97
   0   7   1  657.91  113.82
   0  -7  -1  657.38  158.23
   0  -7  -1  655.09  192.92
   0   7   2 8896.16  522.84
   0  -7  -2 9969.00  491.15
   0  -7  -211219.11  532.56
   0   7   3   22.73   63.63
   0  -7  -3   -5.04  105.59
   0  -7  -3   18.01   87.79
   0   7   4  490.05  505.47
   0  -7  -4  434.42  173.50
   0  -7  -4  581.29  399.59
   0   7   5 1580.28  249.27
   0  -7  -5 1517.05  248.90
   0  -7  -5 1850.38  245.03
   0   7   6 2804.96  352.86
   0  -7  -6 2553.96  280.94
   0  -7  -6 3386.53  377.83
   0   7   7   53.37   87.79
   0  -7  -7   94.41  211.48
   0  -7  -7  168.92  176.08
   0   7   8  245.23  291.99
   0  -7  -8  287.99   66.78
   0  -7  -8  413.90  229.54
   0  -7  -8  467.61  379.80
   0   7   9 5391.20  336.92
   0  -7  -9 5885.43  485.25
   0  -7  -9 5525.92  499.85
   0  -7 -10 8749.17  599.37
   0  -7 -10 7737.37  771.82
   0  -7 -11  731.54  240.64
   0  -7 -11  647.17  593.94
   0  -7 -12  894.31  246.89
   0  -7 -12  775.98  676.36
   0  -7 -13  770.88  244.08
   0  -7 -13  478.48  733.97
   0  -7 -14  658.40  219.80
   0  -7 -14  512.56  791.56
   0  -7 -15  136.92  165.71
   0  -7 -15  122.99  225.83
   0  -7 -16  889.75  255.85
   0   8 -13   -2.02   86.19
   0  -8  13   78.88  258.19
   0   8 -12   60.26  166.32
   0  -8  12   85.67  260.64
   0   8 -11  315.72  381.14
   0  -8  11  419.48  225.87
   0   8 -10   40.74  154.80
   0  -8  10   46.39  165.53
   0   8  -9 3749.90  589.85
   0  -8   9 4335.65  623.98
   0  -8   9 3653.37  439.17
   0   8  -8 1251.70  905.22
   0  -8   8 1360.10  352.61
   0  -8   8 1150.01  209.02
   0   8  -7  805.21  655.06
   0  -8   7  847.33  329.55
   0  -8   7  788.35  203.32
   0   8  -6 1937.24  371.34
   0  -8   6 2256.98  323.89
   0  -8   6 1968.35  209.33
   0   8  -5  658.90  612.47
   0  -8   5  840.64  252.75
   0  -8   5  681.75  165.62
   0   8  -415194.28  621.70
   0   8  -3   53.46   98.25
   0   8  -3   38.18   55.94
   0  -8   3   68.09  129.46
   0  -8   3   64.29  165.42
   0   8  -2 1956.30  343.64
   0   8  -2 2188.45  169.42
   0  -8   2 2559.98  194.95
   0  -8   2 2342.14  295.93
   0   8  -1 3831.75  413.85
   0   8  -1 3842.30  294.67
   0  -8   1 4498.75  343.50
   0  -8   1 3839.64  393.94
   0   8   0   56.29  157.09
   0  -8   0   15.89  113.49
   0  -8   0   38.97  103.10
   0   8   1  429.02  453.97
   0  -8  -1  356.42  195.54
   0  -8  -1  449.33  136.09
   0   8   2 1270.79  423.06
   0  -8  -2 1109.09  237.33
   0  -8  -2 1375.35  217.00
   0   8   3 2028.75  403.00
   0  -8  -3 1606.35  271.12
   0  -8  -3 2244.31  360.74
   0   8   4  464.41  376.89
   0  -8  -4  321.79  202.32
   0  -8  -4  558.19  416.69
   0   8   5  240.42  363.74
   0  -8  -5  226.87  210.95
   0  -8  -5  369.84  320.71
   0   8   6 1172.57  224.19
   0  -8  -6 1237.35  263.91
   0  -8  -6 1439.44  459.36
   0   8   7    2.69   38.86
   0  -8  -7    5.16  131.96
   0  -8  -7   37.84  114.30
   0   8   8  553.11  291.13
   0  -8  -8  771.89  276.14
   0  -8  -8  766.50  271.63
   0   8   9 2538.04  225.97
   0  -8  -9 2466.51  302.53
   0  -8  -9 2546.07  381.14
   0  -8 -10  246.06  236.96
   0  -8 -10  198.48  220.33
   0  -8 -11  188.84  197.91
   0  -8 -11  246.73  298.67
   0  -8 -12  163.89  220.20
   0  -8 -13  296.51  231.86
   0  -8 -13  212.91  343.16
   0  -8 -14 1584.36  284.27
   0  -8 -14 1496.22  252.67
   0  -8 -15  280.26  194.37
   0  -8 -15  160.12  310.54
   0   9 -12  191.83  298.68
   0  -9  12  342.59  273.00
   0   9 -11   93.44  227.59
   0  -9  11  251.30  221.31
   0   9 -10   70.03  162.67
   0  -9  10  141.38  293.58
   0   9  -9   70.69  139.42
   0  -9   9   25.11  156.58
   0   9  -8   13.78  116.58
   0  -9   8   27.13  199.90
   0   9  -7   88.43  120.15
   0  -9   7   96.01  249.71
   0   9  -6  113.82  205.24
   0  -9   6   16.04  157.83
   0  -9   6   41.28  116.59
   0   9  -5  933.17  749.06
   0  -9   5 1022.45  291.35
   0  -9   5  916.31  173.68
   0   9  -4 1473.11  296.09
   0  -9   4 1894.27  325.93
   0  -9   4 1627.02  180.48
   0   9  -3   51.73  132.19
   0  -9   3   22.81  124.40
   0  -9   3   45.56   96.57
   0   9  -2 1589.14  505.40
   0  -9   2 1613.93  262.83
   0  -9   2 1705.63  175.95
   0   9  -1 5357.23  655.59
   0  -9   1 5239.06  446.05
   0  -9   1 5896.79  393.68
   0   9   0 2723.86  571.94
   0  -9   0 2432.45  270.24
   0  -9   0 2703.63  217.91
   0   9   1  904.29  354.23
   0  -9  -1  807.96  247.37
   0  -9  -1  989.95  175.94
   0   9   2 1658.10  305.05
   0  -9  -2 1644.56  280.59
   0  -9  -2 1725.38  184.25
   0   9   3    7.57   73.79
   0  -9  -3   35.82  136.68
   0  -9  -3   40.00   88.34
   0   9   4   29.49  145.64
   0  -9  -4  127.28  249.94
   0  -9  -4   67.29  117.52
   0   9   5   17.24  134.10
   0  -9  -5   -8.77  152.04
   0  -9  -5  -10.72  104.42
   0   9   6  426.06  547.20
   0  -9  -6  547.71  270.52
   0  -9  -6  637.11  530.06
   0   9   7 7373.58  450.95
   0  -9  -7 8335.23  590.41
   0  -9  -7 8502.60  571.09
   0   9   8   18.92  100.02
   0  -9  -8  -15.85  158.75
   0  -9  -8   -1.74  116.69
   0   9   9 3677.13  408.86
   0  -9  -9 4025.29  527.27
   0  -9  -9 3657.46  462.25
   0  -9 -10 2869.09  424.97
   0  -9 -10 2708.15  430.13
   0  -9 -11   46.63  196.52
   0  -9 -11    6.35   74.91
   0  -9 -12  443.11  231.78
   0  -9 -12  290.56  452.83
   0  -9 -13   34.19  196.94
   0  -9 -13   27.82   70.37
   0  -9 -14 4274.92  605.02
   0  -9 -14 4132.43  721.25
   0  10 -10 2762.40  735.29
   0 -10  10 3448.73  520.27
   0  10  -9  348.94  390.52
   0 -10   9  462.97  279.93
   0  10  -8  -14.15  145.46
   0 -10   8  -15.86  183.78
   0  10  -7  347.16  319.50
   0 -10   7  540.21  382.29
   0  10  -6  649.34  484.69
   0 -10   6  845.14  379.45
   0  10  -5  330.46  283.43
   0 -10   5  465.90  345.46
   0  10  -4   28.86  155.82
   0 -10   4   43.36  148.52
   0  10  -3 7790.39  929.08
   0 -10   3 8257.15  858.78
   0  10  -2  966.86  313.01
   0 -10   2  869.35  280.45
   0 -10   2  933.94  145.36
   0  10  -1  511.02  394.25
   0 -10   1  557.24  303.71
   0 -10   1  527.54  137.36
   0  10   0  107.95  187.16
   0 -10   0   73.85  223.08
   0 -10   0  138.69  141.23
   0  10   1  321.69  363.19
   0 -10  -1  341.41  298.72
   0 -10  -1  357.25  364.56
   0  10   2 1223.76  600.33
   0 -10  -2 1341.40  323.35
   0 -10  -2 1294.17  276.49
   0  10   3  947.12  627.08
   0 -10  -3 1067.39  317.73
   0 -10  -3 1052.00  438.71
   0  10   4 2407.53  443.06
   0 -10  -4 2805.00  407.04
   0 -10  -4 2837.10  264.43
   0  10   5  584.99  523.48
   0 -10  -5  642.08  373.08
   0 -10  -5  633.78  522.30
   0  10   6   19.62   55.09
   0 -10  -6   39.80  194.35
   0 -10  -6   74.97  104.22
   0  10   7 1003.81  200.19
   0 -10  -7 1281.52  314.42
   0 -10  -7 1182.51  384.39
   0  10   8 3084.09  350.35
   0 -10  -8 3716.31  469.46
   0 -10  -8 3373.92  588.62
   0 -10  -9 2361.28  359.78
   0 -10  -9 2186.38  388.06
   0 -10 -10 1121.54  265.81
   0 -10 -10  994.14  580.09
   0 -10 -11   28.08  150.58
   0 -10 -11    1.35   90.48
   0 -10 -12  102.67  211.01
   0 -10 -12  112.07  238.35
   0 -10 -13  670.90  246.42
   0 -10 -13  444.60  587.23
   0  11  -8   59.81  161.31
   0 -11   8   40.13  159.19
   0  11  -7  349.12  495.92
   0 -11   7  672.29  314.95
   0  11  -6  137.43  240.08
   0 -11   6  210.02  338.00
   0  11  -5   61.19  229.15
   0 -11   5   39.81  190.40
   0  11  -4  536.92  462.74
   0 -11   4  636.45  335.30
   0  11  -3  -13.83  205.33
   0 -11   3  -29.10  157.59
   0  11  -2  822.20  677.47
   0 -11   2  835.12  305.46
   0  11  -1 3173.50  909.84
   0 -11   1 3823.27  524.12
   0  11   0 6777.41  939.71
   0 -11   0 7993.06  907.37
   0  11   1   46.89  109.80
   0 -11  -1  146.29  255.78
   0 -11  -1   59.90  128.58
   0  11   2 7145.24  969.28
   0 -11  -2 8007.31  928.97
   0 -11  -2 8158.61  942.94
   0  11   3    9.90  111.34
   0 -11  -3   24.43  165.92
   0 -11  -3   19.58   84.12
   0  11   4   57.06  159.20
   0 -11  -4   91.60  227.85
   0 -11  -4  249.37  435.90
   0  11   5   26.60   92.05
   0 -11  -5   70.10  165.40
   0 -11  -5   42.83   98.28
   0  11   6 5030.33  481.85
   0 -11  -6 6409.37  666.96
   0 -11  -6 5817.26  683.58
   0  11   7 1088.97  285.50
   0 -11  -7 1283.32  313.90
   0 -11  -7 1266.16  279.48
   0  11   8 1308.75  205.99
   0 -11  -8 1538.92  296.25
   0 -11  -8 1420.12  426.63
   0 -11  -9   28.21  155.40
   0 -11  -9    2.08   71.80
   0 -11 -10  457.84  213.58
   0 -11 -10  307.39  501.54
   0 -11 -11 1279.18  291.64
   0 -11 -11  974.67  402.10
   0 -12   6  386.41  302.64
   0  12  -5  397.98  599.88
   0 -12   5  650.00  341.81
   0  12  -4  586.03  794.48
   0 -12   4  847.76  337.76
   0  12  -3   83.71  195.20
   0 -12   3  252.08  270.35
   0  12  -2  100.22  207.57
   0 -12   2  142.52  241.49
   0  12  -1   17.65  182.47
   0 -12   1  -41.89  135.31
   0  12   0  482.30  551.78
   0 -12   0  700.48  269.90
   0  12   1  227.04  243.24
   0 -12  -1  313.03  231.14
   0  12   2   33.28  111.68
   0 -12  -2  161.54  230.49
   0  12   3 5796.63  609.16
   0 -12  -3 6845.45  569.65
   0  12   4 2240.70  374.99
   0 -12  -4 2756.90  374.22
   0  12   5  189.08  336.09
   0 -12  -5  473.51  306.64
   0 -12  -5  238.86  315.76
   0  12   6  117.30  204.07
   0 -12  -6  350.01  246.20
   0 -12  -6  202.82  283.84
   0  12   7 1406.67  240.44
   0 -12  -7 1618.71  253.63
   0 -12  -7 1522.64  253.29
   0 -12  -8 1242.85  272.86
   0 -12  -8 1098.83  427.33
   0 -12  -9 2913.16  484.26
   0 -12  -9 2560.06  458.27
   0  13  -2  337.87  672.71
   0 -13   2  698.80  305.58
   0  13  -1  247.51  445.30
   0 -13   1  460.12  278.21
   0  13   0  959.88  564.79
   0 -13   0 1339.14  352.33
   0  13   1  353.83  603.41
   0 -13  -1  676.65  297.37
   0  13   2   37.53  106.03
   0 -13  -2   30.50  197.63
   0  13   3 2732.29  418.93
   0 -13  -3 3259.06  450.06
   0  13   4   53.39  177.78
   0 -13  -4  102.32  272.55
   0  13   5  119.71  260.54
   0 -13  -5  283.68  274.90
   0 -13  -6   96.14  305.21
   1 -13  -5  604.33  320.89
  -1  13   5  162.33  487.04
   1 -13  -4 6632.31  923.26
  -1  13   4 4781.27  718.52
   1 -13  -3  154.78  271.37
  -1  13   3   -3.51  175.74
   1 -13  -2   75.36  148.48
  -1  13   2   80.11  264.76
   1 -13  -1 1449.75  323.99
  -1  13   1 1300.90  501.92
   1 -13   0  -14.95  141.42
  -1  13   0   41.36  155.36
   1 -13   1  276.30  232.67
  -1  13  -1  182.22  333.94
   1 -13   2  430.34  255.45
  -1  13  -2  320.56  537.78
   1 -12  -8  546.65  252.11
   1 -12  -7  108.28  210.55
   1 -12  -6   63.64  179.17
  -1  12   6   71.48  194.18
   1 -12  -5  904.97  274.31
  -1  12   5  664.75  510.17
   1 -12  -4  535.45  273.06
  -1  12   4  322.85  569.63
   1 -12  -3  415.90  284.05
  -1  12   3  222.58  391.10
   1 -12  -2 4305.20  438.09
  -1  12   2 3923.82  828.22
   1 -12  -1  420.60  282.15
  -1  12   1  287.56  484.31
   1 -12   0   44.26  233.77
  -1  12   0  109.79  195.95
   1 -12   1   38.65  174.77
  -1  12  -1  -22.26  162.81
   1 -12   2  473.93  387.30
  -1  12  -2  413.08  479.78
   1 -12   3  628.14  270.47
  -1  12  -3  443.08  547.03
   1 -12   4  945.44  337.08
  -1  12  -4  648.91  866.24
   1 -12   5  160.21  290.92
  -1  12  -5  137.67  226.02
   1 -12   6   49.67  213.39
  -1  12  -6   66.41  110.61
   1 -11 -11 3895.08  619.47
   1 -11 -10  118.71  245.04
   1 -11 -10   65.62  199.20
   1 -11  -9  869.23  231.27
   1 -11  -9  736.81  472.91
   1 -11  -8   65.24  192.40
   1 -11  -8   27.05  137.61
   1 -11  -7  192.90  339.93
   1 -11  -7  394.22  242.07
  -1  11   7  153.43  283.70
   1 -11  -6 1804.17  313.92
   1 -11  -6 1854.77  339.59
  -1  11   6 1860.63  570.80
   1 -11  -5   73.13  144.36
   1 -11  -5  127.90  202.03
  -1  11   5   89.16  182.20
   1 -11  -4  263.47  275.65
  -1  11   4   87.69  249.71
   1 -11  -3 2509.04  371.05
  -1  11   3 2578.48  381.67
   1 -11  -2 3817.33  449.18
  -1  11   2 4030.01  734.87
   1 -11  -1 1330.57  336.26
  -1  11   1 1124.18  524.04
   1 -11   0  699.59  292.84
  -1  11   0  468.59  477.36
   1 -11   1  890.36  328.88
  -1  11  -1  836.68  926.63
   1 -11   2  597.05  307.59
  -1  11  -2  452.69  560.18
   1 -11   3   -4.86  185.65
  -1  11  -3   40.93  213.21
   1 -11   4    6.18  183.38
  -1  11  -4   45.62  133.23
   1 -11   5   27.66  155.19
  -1  11  -5    0.40   87.32
   1 -11   6   68.97  142.11
  -1  11  -6   84.55  215.54
   1 -11   7   -2.10  138.41
  -1  11  -7  -23.92  186.96
   1 -11   8   73.10  220.18
  -1  11  -8  -32.67  181.58
   1 -10 -12  704.55  293.58
   1 -10 -11  267.40  223.91
   1 -10 -10  952.51  289.66
   1 -10 -10  911.41  282.76
   1 -10  -9  272.53  264.56
   1 -10  -9  212.02  364.87
   1 -10  -8   18.30   77.78
   1 -10  -8   13.14  145.78
  -1  10   8   21.00   84.85
   1 -10  -7  163.69  240.05
   1 -10  -7  292.21  283.31
  -1  10   7   86.02  155.33
   1 -10  -6  336.29  375.61
   1 -10  -6  515.96  281.37
  -1  10   6  357.77  547.26
   1 -10  -5 1166.39  306.76
   1 -10  -5 1374.97  331.85
  -1  10   5 1363.55  455.73
   1 -10  -4   37.38  111.89
   1 -10  -4   74.86  257.12
  -1  10   4   24.21  149.60
   1 -10  -3 1776.73  304.80
   1 -10  -3 2079.53  318.13
  -1  10   3 2126.04  649.87
   1 -10  -2 1339.65  242.94
   1 -10  -2 1308.07  290.72
  -1  10   2 1419.46  330.69
   1 -10  -1 1002.07  288.93
  -1  10   1 1061.30  748.64
   1 -10   010661.17  725.04
  -1  10   010490.70  979.87
   1 -10   1  284.88  243.39
   1 -10   2 2768.33  359.92
  -1  10  -2 2398.39  701.93
   1 -10   3  431.77  268.42
  -1  10  -3  415.18  325.10
   1 -10   4  321.16  270.15
  -1  10  -4  276.04  371.22
   1 -10   5  441.59  373.94
  -1  10  -5  412.54  415.75
   1 -10   6  126.28  229.80
  -1  10  -6   94.07  188.55
   1 -10   7 2976.60  497.15
  -1  10  -7 2806.61  680.88
   1 -10   8  863.71  320.37
  -1  10  -8  666.21  687.30
   1 -10   9  201.86  259.77
  -1  10  -9  239.47  277.77
   1 -10  10  783.84  292.56
  -1  10 -10  366.71  668.20
   1  -9 -13   14.81  143.47
  -1   9  13   -7.63  133.05
   1  -9 -12   93.55  252.75
   1  -9 -11  199.76  256.48
   1  -9 -10 1910.38  373.30
   1  -9 -10 1953.13  355.49
   1  -9  -9 1473.84  359.08
   1  -9  -9 1495.85  409.78
   1  -9  -8 6849.71  813.87
   1  -9  -8 6699.91  730.21
   1  -9  -7  734.60  327.77
   1  -9  -7  842.87  333.79
  -1   9   7  640.83  400.20
   1  -9  -6 1374.56  176.33
   1  -9  -6 1354.36  303.26
  -1   9   6 1466.16  216.87
   1  -9  -5  840.40  152.96
   1  -9  -5 1011.97  284.29
  -1   9   5  852.38  294.09
   1  -9  -4 6462.02  585.40
   1  -9  -4 7518.38  598.02
  -1   9   4 7150.05  631.65
   1  -9  -3  489.14  269.76
   1  -9  -3  527.96  239.64
  -1   9   3  582.36  476.73
   1  -9  -2  905.36  168.73
   1  -9  -2  854.52  245.14
  -1   9   2  965.88  609.99
   1  -9  -1 1485.72  179.82
   1  -9  -1 1583.34  267.94
  -1   9   1 1440.80  470.02
   1  -9   0 1516.47  153.38
   1  -9   0 1547.36  211.03
  -1   9   0 1570.34  536.76
   1  -9   1 4005.00  263.83
   1  -9   1 4506.18  407.52
  -1   9  -1 3961.48  470.54
   1  -9   2  213.98  207.53
  -1   9  -2  142.94  101.18
   1  -9   3  908.28  220.58
  -1   9  -3  923.57  782.41
   1  -9   411195.60  679.12
  -1   9  -410356.78 1089.18
   1  -9   5 2652.57  403.36
  -1   9  -5 2383.69  416.24
   1  -9   6 7739.20  890.11
  -1   9  -6 6817.97  794.81
   1  -9   7   44.93  167.03
  -1   9  -7  128.96  257.98
   1  -9   8  499.63  255.87
  -1   9  -8  425.93  581.17
   1  -9   9   43.66  134.64
  -1   9  -9   67.27  124.03
   1  -9  10 1933.41  395.73
  -1   9 -10 1612.30  696.91
   1  -9  11  590.67  284.60
  -1   9 -11  256.97  556.85
   1  -9  12 3026.15  498.82
  -1   9 -12 2781.49  584.46
   1  -8 -14   14.57  139.15
  -1   8  14   55.63  186.74
   1  -8 -13  837.80  260.38
  -1   8  13  624.80  314.27
   1  -8 -12  994.00  324.66
   1  -8 -11  758.18  327.65
   1  -8 -10   59.48  330.93
   1  -8 -10   99.63  187.28
   1  -8  -9    6.13   44.35
   1  -8  -9  -23.46  178.76
   1  -8  -9   28.47   94.15
   1  -8  -8  573.00  133.45
   1  -8  -8  540.77  272.92
   1  -8  -8  448.59  532.39
   1  -8  -7 2017.02  311.56
   1  -8  -7 2234.99  362.86
  -1   8   7 1970.56  208.49
   1  -8  -6  155.34  174.66
   1  -8  -6   97.85  190.53
  -1   8   6   86.56  182.15
   1  -8  -5  501.98  395.81
   1  -8  -5  446.03  218.41
  -1   8   5  565.32  564.72
   1  -8  -4   41.21   82.08
   1  -8  -4    6.32  132.01
  -1   8   4   84.34  150.40
   1  -8  -3  627.22  212.08
   1  -8  -3  535.63  224.54
  -1   8   3  800.91  711.28
   1  -8  -2   34.30   89.63
   1  -8  -2   54.92  111.84
  -1   8   2   53.73  128.73
  -1   8   2   66.38   90.72
   1  -8  -1 1145.57  158.00
   1  -8  -1 1075.86  200.82
  -1   8   1 1021.40  303.40
  -1   8   1 1091.97  127.62
   1  -8   0 1252.83  138.52
   1  -8   0 1087.79  188.86
  -1   8   0 1403.65  422.83
  -1   8   0 1165.78  129.49
   1  -8   1  951.11   98.29
   1  -8   1  872.39  175.35
  -1   8  -1  739.27  190.46
  -1   8  -1  898.33   89.19
   1  -8   2 8155.43  404.16
  -1   8  -2 7004.61  699.03
   1  -8   3  780.11  213.34
  -1   8  -3  617.91  282.87
   1  -8   4  899.69  273.15
  -1   8  -4  638.53  268.02
   1  -8   5 3407.26  406.59
  -1   8  -5 2618.34  450.13
   1  -8   610714.10  682.36
  -1   8  -6 8875.43  691.44
   1  -8   7  964.96  332.58
  -1   8  -7  944.23  872.36
   1  -8   8  463.62  320.42
  -1   8  -8  374.61  353.21
   1  -8   9  219.63  212.54
  -1   8  -9  232.36  407.07
   1  -8  10   27.98  117.67
  -1   8 -10    2.21   82.29
   1  -8  11 1705.95  364.18
  -1   8 -11 1587.29  332.17
   1  -8  12   12.20  132.53
  -1   8 -12   26.43  111.18
   1  -8  13   66.74  134.31
  -1   8 -13   38.16   87.06
   1  -7 -15   27.31  127.77
  -1   7  15   20.10  134.47
   1  -7 -14 1937.02  291.24
  -1   7  14 2018.43  362.53
   1  -7 -13   12.42  147.19
  -1   7  13   36.62  212.94
   1  -7 -12   29.03  169.19
  -1   7  12   34.13  150.73
   1  -7 -11  630.74  338.01
   1  -7 -10  317.82  290.46
   1  -7 -10  328.16  247.42
   1  -7  -9  416.45   94.81
   1  -7  -9  487.66  282.61
   1  -7  -9  432.91  414.42
   1  -7  -8    5.45   46.63
   1  -7  -8   30.01  147.94
   1  -7  -8   13.75  137.82
   1  -7  -7 1542.42  267.64
   1  -7  -7 1510.65  376.57
   1  -7  -6 3832.12  377.01
   1  -7  -6 3753.98  332.29
  -1   7   6 4267.46  337.53
   1  -7  -5 6190.06  619.64
   1  -7  -5 5640.96  460.16
  -1   7   5 7273.81  695.90
   1  -7  -4 7249.85  561.15
   1  -7  -4 7067.13  544.37
  -1   7   4 8545.75  722.94
   1  -7  -3 4583.42  484.38
   1  -7  -3 4553.88  308.51
  -1   7   3 4939.88  429.61
   1  -7  -215236.69  645.00
   1  -7  -1 1668.66  167.37
   1  -7  -1 1443.75  223.22
  -1   7   1 1347.48  450.43
  -1   7   1 1739.71  130.86
   1  -7   0   48.74   57.23
   1  -7   0   42.50  127.33
  -1   7   0   74.94  100.98
  -1   7   0   50.25   70.23
   1  -7   1  298.10  116.19
   1  -7   1  293.57  157.01
  -1   7  -1  283.80  314.54
  -1   7  -1  275.70   66.33
   1  -7   2    0.74    6.15
   1  -7   2   10.62   93.84
  -1   7  -2   -6.78   95.25
  -1   7  -2   13.83   24.20
   1  -7   3 1037.47  215.70
  -1   7  -3  834.05  257.74
   1  -7   415610.18 1081.08
  -1   7  -410755.91 1036.24
   1  -7   5  926.19   51.65
   1  -7   5  998.07  283.10
  -1   7  -5  859.61  388.04
   1  -7   6 7846.90  213.50
   1  -7   6 9778.80  549.64
  -1   7  -6 7784.05  720.08
   1  -7   7   55.30   78.58
   1  -7   7   73.03  203.97
  -1   7  -7  142.63  219.64
   1  -7   8   44.57   88.74
   1  -7   8   42.72  232.67
  -1   7  -8   33.33  140.39
   1  -7   9  290.51  225.96
  -1   7  -9  304.49  391.57
   1  -7  10 2645.30  397.21
  -1   7 -10 2570.12  477.00
   1  -7  11   26.99  122.81
  -1   7 -11   59.55  180.19
   1  -7  12  510.25  283.57
  -1   7 -12  366.59  479.15
   1  -7  13  490.20  250.59
  -1   7 -13  288.94  509.67
   1  -7  14   11.14  134.15
  -1   7 -14   34.54  128.73
   1  -6 -16  592.73  227.03
  -1   6  16  585.86  323.98
   1  -6 -15   40.02  185.95
  -1   6  15   21.63  137.21
   1  -6 -14   95.75  227.44
  -1   6  14   47.21  223.27
   1  -6 -13 1105.18  286.31
  -1   6  13 1205.89  411.86
   1  -6 -12  251.55  284.16
  -1   6  12  326.92  389.51
   1  -6 -11 4869.37  469.73
  -1   6  11 4517.70  514.39
   1  -6 -10 1739.69  278.67
   1  -6  -9   13.61   37.21
   1  -6  -9   23.09   50.61
   1  -6  -9   25.13  136.20
   1  -6  -9   -3.68  137.47
   1  -6  -8  427.72   78.46
   1  -6  -8  491.91   91.62
   1  -6  -8  477.27  239.86
   1  -6  -8  539.01  563.32
   1  -6  -7 1476.05  139.08
   1  -6  -7 1781.55  176.88
   1  -6  -7 1332.44  248.32
   1  -6  -7 1596.36  245.86
   1  -6  -6  469.34  198.68
   1  -6  -6  507.40   91.11
   1  -6  -6  541.22  329.77
  -1   6   6  487.26  131.75
   1  -6  -5 7018.32  423.27
   1  -6  -5 7024.94  401.74
  -1   6   5 7735.08  452.75
   1  -6  -4  336.71  298.85
   1  -6  -4  285.63  157.62
  -1   6   4  423.96  434.62
   1  -6  -3 4507.51  404.86
   1  -6  -3 3604.19  249.92
  -1   6   3 5059.05  560.37
  -1   6   3 4889.42  209.42
   1  -6  -2  359.04  125.64
   1  -6  -2  387.10  149.16
  -1   6   2  356.64  387.26
  -1   6   2  345.33   86.25
   1  -6  -1 1317.48  140.61
   1  -6  -1 1208.91  198.58
  -1   6   1 1103.84  350.22
  -1   6   1 1412.34  137.84
   1  -6   0  162.40  111.20
   1  -6   0  224.50  133.12
  -1   6   0  184.43  217.22
  -1   6   0  162.46   75.80
   1  -6   1  897.75   88.55
   1  -6   1  855.29  159.71
  -1   6  -1  831.87  180.58
  -1   6  -1  900.30   95.11
   1  -6   2 5305.24  261.98
  -1   6  -2 5227.02  493.90
   1  -6   313433.86  438.84
  -1   6  -311719.12  643.05
   1  -6   417912.78   87.66
  -1   6  -417710.31  567.28
   1  -6   5 4106.25  197.08
   1  -6   5 3746.96  290.78
  -1   6  -5 3304.49  359.63
   1  -6   6   30.70   35.92
   1  -6   6   73.60  166.60
   1  -6   6   25.63   57.86
  -1   6  -6   46.08   75.11
   1  -6   7 1709.68  148.42
   1  -6   7 2008.28  295.27
   1  -6   7 1674.19  139.42
  -1   6  -7 1458.17  348.99
   1  -6   8  751.19  155.00
   1  -6   8  936.34  277.38
  -1   6  -8  905.02  831.21
   1  -6   9 5597.40  367.01
   1  -6   9 8680.42  589.35
  -1   6  -9 8136.29  701.45
   1  -6  10  564.07  179.55
   1  -6  10  554.22  244.82
  -1   6 -10  440.27  698.95
   1  -6  11  884.22  195.31
   1  -6  11  982.64  304.50
  -1   6 -11  859.74  603.34
   1  -6  12  652.36  284.52
  -1   6 -12  375.38  532.86
   1  -6  13   71.26  187.45
  -1   6 -13   -2.78  135.89
   1  -6  14  655.46  251.85
  -1   6 -14  291.39  510.82
   1  -6  15 2943.77  504.46
  -1   6 -15 1988.22  393.69
   1  -5 -16 2124.58  364.18
  -1   5  16 2071.11  469.26
   1  -5 -15  109.66  189.19
   1  -5 -14   20.66  124.95
  -1   5  14   56.57  268.01
   1  -5 -13  558.65  308.35
  -1   5  13  518.22  327.96
   1  -5 -12   61.07  196.88
  -1   5  12   93.92  317.74
   1  -5 -11 1218.98  255.64
  -1   5  11 1279.02  397.51
   1  -5 -10 2174.51  297.60
  -1   5  10 2158.19  348.22
   1  -5  -9  195.70   44.71
   1  -5  -9  223.54   55.89
   1  -5  -9  151.68  175.93
   1  -5  -8  204.64   57.88
   1  -5  -8  225.28   67.72
   1  -5  -8  162.84  162.25
   1  -5  -8  179.28  204.57
   1  -5  -7 7794.20  310.82
   1  -5  -7 8331.73  336.82
   1  -5  -7 8014.16  453.25
   1  -5  -7 7295.67  526.35
   1  -5  -6 4989.65  231.47
   1  -5  -6 5469.60  264.60
   1  -5  -6 4434.03  284.82
   1  -5  -6 4271.36  318.40
   1  -5  -510638.68  386.93
   1  -5  -511986.08  308.62
   1  -5  -5 9812.62  352.92
  -1   5   510550.53  353.88
   1  -5  -4 5572.16  321.59
   1  -5  -4 6876.25  417.09
   1  -5  -4 5967.03  473.28
  -1   5   4 6425.82  503.67
   1  -5  -3  108.75  148.61
   1  -5  -3  185.69  148.76
   1  -5  -3  150.91  114.45
  -1   5   3  175.61  184.55
  -1   5   3  154.42  135.10
   1  -5  -2 3516.10  276.79
   1  -5  -2 3791.12  260.56
  -1   5   2 3354.56  356.95
  -1   5   2 3785.61  209.23
   1  -5  -1 1540.47  218.40
   1  -5  -1 1531.23  170.47
  -1   5   1 1469.58  357.14
  -1   5   1 1614.91  110.48
   1  -5   0 8263.28  387.30
   1  -5   0 7271.73  377.03
  -1   5   0 8046.29  418.57
   1  -5   1 1769.80   95.93
   1  -5   1 1645.62  179.27
  -1   5  -1 1638.46  335.85
  -1   5  -1 1771.86  105.07
   1  -5   211613.90  537.03
  -1   5  -212898.53  590.18
   1  -5   3 4011.29  263.48
  -1   5  -3 3920.65  548.88
   1  -5   4   12.22   18.68
   1  -5   4  -10.01   95.14
  -1   5  -4   33.98   71.80
   1  -5   5 4391.08  195.47
   1  -5   5 3877.25  223.67
   1  -5   5 4176.50  144.91
  -1   5  -5 3703.41  447.12
   1  -5   6 2010.47  146.71
   1  -5   6 1746.03  193.02
   1  -5   6 1968.85  136.89
  -1   5  -6 1771.29  321.20
  -1   5  -7 6971.29  644.87
   1  -5   8 3252.08  256.36
   1  -5   8 3807.82  371.25
   1  -5   8 3460.62  295.11
  -1   5  -8 3052.56  337.41
   1  -5   9 2299.62  219.93
   1  -5   9 2531.43  286.14
  -1   5  -9 2297.43  412.26
   1  -5  10  409.53  176.69
   1  -5  10  431.62  220.00
  -1   5 -10  375.06  516.08
   1  -5  11  910.82  213.61
   1  -5  11  939.04  265.52
  -1   5 -11  885.42  679.17
   1  -5  12  604.67  239.05
   1  -5  12  726.29  255.31
  -1   5 -12  548.42  512.50
   1  -5  13  946.33  243.43
   1  -5  13 1007.97  318.31
  -1   5 -13  832.34  367.26
   1  -5  14  432.68  176.21
   1  -5  14  458.89  250.25
  -1   5 -14  253.90  409.76
   1  -5  15 5371.10  398.37
   1  -5  16   34.24  145.92
   1  -4 -17 3407.38  696.28
  -1   4  17 2960.13  550.58
   1  -4 -16  135.55  226.81
  -1   4  16  182.33  309.62
   1  -4 -15  313.17  273.51
  -1   4  15  280.21  295.30
   1  -4 -14  203.74  184.30
  -1   4  14  160.86  278.95
   1  -4 -13  277.66  261.28
  -1   4  13  258.68  341.43
   1  -4 -12 3594.50  381.05
  -1   4  12 3551.93  463.91
   1  -4 -11 1181.01  232.15
  -1   4  11 1260.91  351.04
   1  -4 -10 2457.97  280.59
  -1   4  10 2635.41  367.47
   1  -4  -9 1060.94  227.30
  -1   4   9 1025.14  277.90
   1  -4  -8 4740.15  193.23
   1  -4  -8 4709.36  184.23
   1  -4  -8 4550.52  341.34
   1  -4  -7 1008.98  108.21
   1  -4  -7 1070.08  122.99
   1  -4  -7  941.92  182.11
   1  -4  -6 2114.41  151.08
   1  -4  -6 2232.85  126.24
   1  -4  -6 2095.84  209.92
   1  -4  -6 1733.27  184.79
   1  -4  -524167.43 1574.05
   1  -4  -520966.42 1366.54
   1  -4  -518577.73  833.51
   1  -4  -421130.53 1378.91
   1  -4  -417944.35  784.51
   1  -4  -416399.24  722.97
  -1   4   422962.06 1505.75
   1  -4  -3   20.02  126.48
   1  -4  -3   16.10   94.40
   1  -4  -3    9.31   31.64
  -1   4   3   24.33   83.04
  -1   4   3    4.93   34.83
   1  -4  -2 7064.34  298.27
   1  -4  -2 7143.07  274.04
   1  -4  -2 6380.93  322.90
  -1   4   2 6047.70  429.90
  -1   4   2 8224.21  334.82
   1  -4  -1 6925.10  372.29
   1  -4  -1 5659.77  268.34
   1  -4  -1 6579.64  351.95
  -1   4   1 7186.10  275.81
  -1   4   1 7019.35  236.11
   1  -4   0 6966.58  296.70
   1  -4   0 9564.51  360.03
  -1   4   0 8133.51  355.56
  -1   4   0 9217.61  334.58
  -1   4   0 8415.74  259.27
   1  -4   1  354.77  132.06
   1  -4   1  346.25  206.93
  -1   4  -1  345.61  391.14
  -1   4  -1  348.77  120.78
   1  -4   2  871.44  154.34
  -1   4  -2  990.45  384.98
  -1   4  -2 1123.51  127.14
   1  -4   3 9167.28  356.63
  -1   4  -310171.62  396.68
  -1   4  -311777.81  399.47
   1  -4   4  711.35  102.61
   1  -4   4  557.20  151.99
   1  -4   4  678.06   74.05
  -1   4  -4  583.08  392.82
   1  -4   519717.55  852.78
  -1   4  -524252.41 1606.48
   1  -4   6 8088.13  259.30
   1  -4   6 7303.27  300.68
   1  -4   6 7876.78  254.10
  -1   4  -6 6545.66  379.08
   1  -4   7   -7.46   32.57
   1  -4   7   16.15  105.58
   1  -4   7   10.87   61.68
  -1   4  -7   14.81  102.79
   1  -4   8    1.37   17.58
   1  -4   8   63.62  173.87
   1  -4   8  -12.61   48.85
  -1   4  -8   21.21   62.17
   1  -4   9   10.02   57.91
   1  -4   9   27.43  110.15
  -1   4  -9   73.48  137.57
   1  -4  10 9998.05  383.14
   1  -4  1011784.23  490.62
  -1   4 -1012009.11  573.00
   1  -4  11  120.59  149.56
   1  -4  11   97.92  162.45
  -1   4 -11   63.58  139.62
   1  -4  12  -11.17   69.50
   1  -4  12   17.16  109.13
  -1   4 -12   28.80  107.85
   1  -4  13  110.73  164.00
   1  -4  13  177.06  170.53
  -1   4 -13   92.01  120.59
   1  -4  14   66.93  161.73
   1  -4  14   10.20   90.83
   1  -4  15   31.71  142.12
   1  -4  15  -12.98  101.05
   1  -4  16   15.30  113.43
   1  -4  16   83.58  170.38
   1  -3 -17 2059.27  486.60
  -1   3  17 2088.06  471.93
   1  -3 -16   63.13  121.67
  -1   3  16   89.46  237.74
   1  -3 -15 3662.43  765.05
  -1   3  15 3462.91  578.07
   1  -3 -14  677.71  278.25
  -1   3  14  592.68  346.06
   1  -3 -13 3797.65  419.22
  -1   3  13 3292.76  470.29
   1  -3 -12 1350.45  287.22
  -1   3  12 1227.59  338.97
   1  -3 -11  437.86  231.11
  -1   3  11  358.46  259.74
   1  -3 -10   88.41  203.38
  -1   3  10  103.30  234.10
   1  -3  -9  217.81  183.08
  -1   3   9  174.50  179.77
   1  -3  -8 4045.92  157.81
   1  -3  -8 4183.43  159.03
   1  -3  -8 3621.92  274.66
  -1   3   8 3588.37  295.62
   1  -3  -718112.99  354.85
   1  -3  -715612.32  318.20
   1  -3  -717168.22  511.76
  -1   3   716843.03  496.74
   1  -3  -6 1560.30  126.75
   1  -3  -6 1982.50  131.19
   1  -3  -6 1616.21  194.63
  -1   3   6 1676.11  226.74
   1  -3  -5 4523.30  172.79
   1  -3  -5 5271.12  198.95
   1  -3  -5 4129.69  248.44
  -1   3   5 4351.78  268.89
   1  -3  -4 2597.70  136.98
   1  -3  -4 2877.71  143.18
   1  -3  -4 2451.82  181.93
  -1   3   4 2858.76  181.42
   1  -3  -3 7363.33  241.59
   1  -3  -3 6209.01  217.81
   1  -3  -3 6468.08  255.07
  -1   3   3 6164.31  252.86
  -1   3   3 7543.57  238.80
   1  -3  -2 1560.49  152.63
   1  -3  -2 1423.61  141.82
  -1   3   2 1679.76  153.99
  -1   3   2 1697.09  115.38
  -1   3   2 1457.39  129.10
   1  -3  -1 5383.79  213.61
   1  -3  -1 6259.62  219.63
  -1   3   1 5248.54  253.53
  -1   3   1 5984.63  223.57
  -1   3   1 6358.68  207.42
  -1   3   1 5937.60  218.01
   1  -3   040406.66 1144.67
  -1   3   038152.13 1105.83
  -1   3   035393.66  993.87
  -1   3   039952.02 1084.15
   1  -3   1 3520.81  187.43
   1  -3   1 4258.98  417.26
  -1   3  -1 4350.15  418.18
  -1   3  -1 4598.61  204.26
   1  -3   2  157.99  119.39
   1  -3   2  173.32  179.67
  -1   3  -2  225.73  275.48
  -1   3  -2  161.18  104.61
   1  -3   315041.83  355.51
   1  -3   314190.03  399.04
   1  -3   313527.74  310.35
  -1   3  -313754.59  371.64
  -1   3  -313839.77  435.68
   1  -3   4 6135.72  219.45
   1  -3   4 6554.77  333.95
   1  -3   4 4793.50  228.72
   1  -3   4 6327.46  223.42
  -1   3  -4 6042.84  545.99
   1  -3   518058.84  547.68
   1  -3   518433.65  573.31
   1  -3   515714.96  529.78
   1  -3   518640.12  529.84
  -1   3  -517933.63  599.31
   1  -3   617980.95  729.50
   1  -3   615918.27  704.09
   1  -3   617177.31  732.21
  -1   3  -616655.54  750.42
   1  -3   7 4036.72  228.34
   1  -3   7 4133.05  249.83
   1  -3   7 4091.15  225.21
  -1   3  -7 4068.48  333.65
   1  -3   8   87.84   80.04
   1  -3   8   74.28  146.08
   1  -3   8   55.01  100.06
  -1   3  -8   97.30  133.70
   1  -3   9  106.72  150.45
   1  -3   9  182.38  181.96
  -1   3  -9  113.91  173.87
   1  -3  10 1483.34  225.15
   1  -3  10 1502.49  270.15
  -1   3 -10 1452.19  427.36
   1  -3  11 1816.91  232.14
   1  -3  11 2177.69  305.54
  -1   3 -11 1894.18  447.59
   1  -3  12 2523.70  271.83
   1  -3  13    3.96   70.11
   1  -3  13   17.96  120.82
   1  -3  14 1036.75  138.77
   1  -3  14 1098.52  237.14
   1  -3  15  365.60  223.27
   1  -3  15  259.50  191.83
   1  -3  16  -12.06  111.72
   1  -3  16   -4.91  119.30
   1  -3  17  201.87  174.82
   1  -3  17  119.86  190.49
   1  -2 -17   76.14  208.90
  -1   2  17  -11.75  136.45
   1  -2 -16 2599.50  531.76
  -1   2  16 2447.60  464.54
   1  -2 -15  967.54  627.81
  -1   2  15  854.87  328.42
   1  -2 -14  946.60  920.08
  -1   2  14  849.08  349.34
   1  -2 -13   -6.15  174.95
  -1   2  13   19.87  135.55
   1  -2 -12   48.25  144.72
  -1   2  12   24.90  144.42
   1  -2 -11  763.51  242.28
  -1   2  11  602.92  235.00
   1  -2 -10   14.43  124.56
  -1   2  10  110.35  163.94
   1  -2  -9 8358.51  461.38
  -1   2   9 8027.71  441.54
   1  -2  -8 5537.81  136.50
   1  -2  -8 6179.22  138.04
   1  -2  -8 5717.75  289.70
  -1   2   8 5779.61  309.87
   1  -2  -7  108.60   54.71
   1  -2  -7  131.24  161.20
  -1   2   7    9.49   97.70
   1  -2  -613518.20  548.10
   1  -2  -613281.70  616.73
  -1   2   614094.25  665.47
   1  -2  -5 5612.45  186.57
   1  -2  -5 5814.54  273.78
  -1   2   5 5571.70  285.78
   1  -2  -477961.07 2105.78
  -1   2   489621.88 2434.87
  -1   2   484502.36 2317.40
   1  -2  -327069.93  783.78
   1  -2  -321556.94  539.05
   1  -2  -323210.55  625.44
  -1   2   323637.61  709.85
  -1   2   323937.38  742.80
  -1   2   322511.06  633.39
   1  -2   0  179.01  248.04
   1  -2   0  111.65  189.37
   1  -2   0  247.40  175.91
   1  -2   0  256.51  152.08
  -1   2   0  451.47  244.65
  -1   2   0  228.34  163.40
   1  -2   1 4550.85  202.94
   1  -2   1 6047.61  323.55
   1  -2   1 5594.06  158.37
  -1   2  -1 5301.32  292.40
  -1   2  -1 5805.57  186.32
  -1   2  -1 6137.84  242.30
   1  -2   2 1374.53  140.56
   1  -2   2 1627.57  184.08
  -1   2  -2 1487.22  179.88
  -1   2  -2 1711.44  134.72
  -1   2  -2 1674.07   98.38
   1  -2   3  631.71  127.40
   1  -2   3  760.24  252.59
   1  -2   3  744.03   63.93
  -1   2  -3  806.72  436.50
  -1   2  -3  834.47  130.12
  -1   2  -3  759.35  108.29
   1  -2   420445.97  506.09
   1  -2   421049.91  534.94
   1  -2   419716.73  542.84
   1  -2   420334.59  477.69
  -1   2  -420691.85  557.91
  -1   2  -420972.09  508.28
   1  -2   5 3145.53  214.13
   1  -2   5 2977.12  166.57
   1  -2   5 3403.61  212.43
   1  -2   5 3208.39  191.27
  -1   2  -5 2831.40  192.34
  -1   2  -5 3378.16  222.93
   1  -2   6 2369.33  199.60
   1  -2   6 2352.94  178.75
   1  -2   6 2591.52  190.77
   1  -2   6 2540.79  181.97
  -1   2  -6 2039.23  178.53
  -1   2  -6 2734.26  278.66
   1  -2   7  249.71  110.52
   1  -2   7   83.69   93.29
   1  -2   7   42.90   53.10
  -1   2  -7   79.03  158.63
  -1   2  -7  106.49  130.81
  -1   2  -8  268.65  333.08
  -1   2  -8  244.06  131.03
   1  -2   9  656.64  162.39
  -1   2  -9  715.36  292.85
  -1   2  -9  657.19  294.29
   1  -2  10  249.32  197.62
  -1   2 -10  279.96  265.95
   1  -2  1110143.33  355.66
   1  -2  11 9531.65  434.33
  -1   2 -11 9498.32  602.88
   1  -2  12 1335.19  148.73
   1  -2  12 1168.53  246.42
  -1   2 -12 1270.99  439.11
   1  -2  13 5570.78  336.02
   1  -2  13 5429.41  426.88
  -1   2 -13 5614.00  485.80
   1  -2  14 1794.77  218.60
   1  -2  14 1850.58  346.29
  -1   2 -14 1909.56  507.77
   1  -2  15   60.46  154.92
  -1   2 -15    1.62   58.86
   1  -2  16    1.21   89.71
  -1   2 -16   10.38  104.54
   1  -2  17   26.36  113.96
  -1   2 -17    8.19   93.85
   1  -1 -17 2085.52  473.08
  -1   1  17 2025.55  423.28
   1  -1 -16 3853.84  616.02
  -1   1  16 3638.02  510.97
   1  -1 -15 2556.70  569.21
  -1   1  15 2383.50  571.03
   1  -1 -14 5855.99  995.25
  -1   1  14 5553.73  745.82
   1  -1 -13  936.96  453.78
  -1   1  13  811.30  276.18
   1  -1 -12 3870.00  649.03
  -1   1  12 3360.67  369.31
   1  -1 -11 1322.83  492.36
  -1   1  11 1248.28   51.86
  -1   1  11 1076.34  221.51
   1  -1 -10   26.12   38.27
   1  -1 -10   13.00   64.73
  -1   1  10   23.12   39.16
  -1   1  10   56.92  146.83
   1  -1  -9 8851.22  333.94
   1  -1  -9 8642.15  468.07
  -1   1   9 9109.83  330.25
  -1   1   9 8115.11  440.45
   1  -1  -8  801.02  103.66
   1  -1  -8  828.11  185.11
  -1   1   8  869.77   79.97
  -1   1   8  822.13  231.73
   1  -1  -7  528.94   89.07
   1  -1  -7  475.46  160.47
  -1   1   7  536.11   67.11
  -1   1   7  448.00  191.68
   1  -1  -6 6026.60  203.27
   1  -1  -6 5398.06  268.88
  -1   1   6 6596.13  204.46
  -1   1   6 5733.68  285.78
   1  -1  -5 8944.13  279.59
   1  -1  -5 8273.03  324.27
  -1   1   5 8893.90  269.23
  -1   1   510045.61  372.34
  -1   1   510627.85  502.85
  -1   1   5 9566.98  396.94
   1  -1  -4  570.15   80.73
   1  -1  -4  385.15  134.81
  -1   1   4  586.04   67.80
  -1   1   4  601.79  126.40
  -1   1   4  457.92  161.83
   1  -1  -1 3606.70  203.63
   1  -1  -1 4519.45  281.70
   1  -1  -1 3464.34  233.61
  -1   1   1 4006.11  229.04
  -1   1   1 3951.23  428.39
  -1   1   1 4258.09  200.15
   1  -1   1 1790.86  229.23
   1  -1   1 2674.75  300.15
   1  -1   1 1956.52  198.31
  -1   1  -1 2437.91  231.28
  -1   1  -1 2263.30  266.06
  -1   1  -1 2124.94  172.15
   1  -1   2 2470.69  157.00
   1  -1   2 2283.65  158.10
   1  -1   2 2372.51  160.06
   1  -1   2 2561.31  134.37
  -1   1  -2 2634.98  143.41
  -1   1  -2 2480.07  137.18
   1  -1   310974.71  322.58
   1  -1   310027.51  294.85
   1  -1   3 9198.43  252.89
   1  -1   310481.15  301.93
  -1   1  -310190.17  325.41
   1  -1   412566.54  314.48
   1  -1   411979.95  314.50
   1  -1   412220.68  328.74
  -1   1  -411641.81  402.35
   1  -1   530088.66  858.74
   1  -1   528947.75  802.79
   1  -1   528725.08  807.23
  -1   1  -526360.96  742.08
  -1   1  -524815.21  712.21
   1  -1   6   30.00   53.14
   1  -1   6   32.66   67.05
   1  -1   6   55.18   73.52
   1  -1   6  118.55  111.03
  -1   1  -6  134.86  184.39
  -1   1  -6   91.34   85.51
   1  -1   7  184.98  107.38
   1  -1   7  196.45   94.63
   1  -1   7  183.45   78.91
   1  -1   7  196.21  166.48
  -1   1  -7  258.12  271.84
  -1   1  -7  160.95  231.54
   1  -1   8 4701.53  193.50
   1  -1   8 5457.82  210.17
   1  -1   8 5180.80  188.94
  -1   1  -8 5018.70  293.46
  -1   1  -8 4257.32  293.50
   1  -1   9 8125.83  432.16
   1  -1   9 8688.25  361.98
  -1   1  -9 8274.93  596.96
  -1   1  -9 7925.34  586.69
   1  -1  10  146.57   73.33
   1  -1  10  181.76   83.40
  -1   1 -10  242.38  270.60
  -1   1 -10  202.69  180.93
   1  -1  11 2132.02  126.12
   1  -1  11 2314.94  140.50
  -1   1 -11 2530.28  410.87
   1  -1  12 3635.79  177.55
   1  -1  12 3735.49  330.11
  -1   1 -12 3992.85  547.20
   1  -1  13 3308.47  221.92
   1  -1  13 3007.37  354.16
  -1   1 -13 3323.60  333.47
   1  -1  14 7741.90  787.79
  -1   1 -14 8541.03  947.49
   1  -1  15 1073.59  285.09
  -1   1 -15 1184.55  279.54
   1  -1  16  603.18  250.37
  -1   1 -16  560.39  438.22
   1  -1  17    0.13   95.08
  -1   1 -17    8.97   80.68
   1  -1  18  748.43  279.76
   1   0 -17   -7.94  133.30
  -1   0  17    4.93  155.80
   1   0 -16  412.01  486.47
  -1   0  16  503.96  307.33
   1   0 -15   73.96  169.93
  -1   0  15   95.54  229.21
   1   0 -14   11.29  112.60
  -1   0  14   -5.57  178.00
   1   0 -13 1834.81  734.89
  -1   0  13 1526.00  381.42
   1   0 -12   42.96   42.36
   1   0 -12  102.28  227.31
  -1   0  12   20.95  137.06
   1   0 -11    3.29   34.95
   1   0 -11  -18.89  136.09
  -1   0  11   -5.75   19.96
  -1   0  11   66.89  168.36
   1   0 -10 3670.11  290.05
   1   0 -10 3102.92  524.52
  -1   0  10 3433.95  232.32
  -1   0  10 3125.13  351.94
   1   0  -9 9758.52  393.33
   1   0  -9 9489.48  570.89
  -1   0   9 9966.28  373.96
  -1   0   9 9019.41  484.98
   1   0  -8  869.96  131.08
   1   0  -8  943.02  346.63
  -1   0   8  884.53   85.27
  -1   0   8  897.68  239.19
   1   0  -7  630.44  111.40
   1   0  -7  676.61  287.14
  -1   0   7  618.98   68.21
  -1   0   7  618.45  194.81
   1   0  -6 6595.52  242.00
   1   0  -6 5070.02  259.65
  -1   0   6 6275.80  207.39
  -1   0   6 5111.63  282.70
   1   0  -5 3604.14  165.38
   1   0  -5 3218.47  192.28
   1   0  -5 3051.01  208.05
  -1   0   5 3275.54  186.63
  -1   0   5 3001.97  214.10
  -1   0   5 3433.06  133.71
   1   0  -414683.69  368.33
   1   0  -417026.71  458.04
   1   0  -415707.23  453.88
  -1   0   416438.61  443.16
  -1   0   415424.53  446.59
  -1   0   415481.79  383.04
   1   0  -315542.66  429.41
   1   0  -317766.73  460.92
   1   0  -315880.26  466.18
  -1   0   316537.38  447.83
  -1   0   316188.67  462.65
  -1   0   316258.03  419.44
   1   0  -2 8702.10  259.81
   1   0  -2 9927.85  299.81
   1   0  -2 9357.01  316.02
  -1   0   2 9278.32  273.58
  -1   0   2 9187.04  376.10
  -1   0   2 9516.29  256.53
   1   0  -1 8983.47  345.13
   1   0  -1 9434.16  405.57
  -1   0   110934.98  348.34
  -1   0   111175.18  375.22
  -1   0   110874.34  757.18
   1   0   0 9528.11  350.26
   1   0   011508.45  415.71
   1   0   010513.87  331.09
  -1   0   011247.23  342.53
  -1   0   0 9751.13  531.71
  -1   0   011927.81  352.87
   1   0   1 6444.73  271.09
   1   0   1 8699.37  455.43
   1   0   1 7588.49  236.28
  -1   0  -1 7524.71  239.13
  -1   0  -1 7033.30  436.35
  -1   0  -1 7948.97  294.05
   1   0   2 2318.61  187.45
   1   0   2 3019.70  213.16
  -1   0  -2 2439.43  240.91
  -1   0  -2 2816.79  163.17
   1   0   3   -3.29   85.34
   1   0   3   -9.20   30.06
   1   0   3  -14.77   82.05
  -1   0  -3  -21.40   94.38
  -1   0  -3  -21.42   74.38
   1   0   4 3764.09  159.08
   1   0   4 4469.32  171.09
   1   0   4 4305.28  145.34
  -1   0  -4 4313.10  223.16
  -1   0  -4 3526.43  270.76
  -1   0  -4 4691.89  162.30
   1   0   517544.84  433.22
   1   0   515932.44  401.37
   1   0   517056.35  421.65
   1   0   518895.87  488.37
  -1   0  -516919.50  421.61
  -1   0  -516779.13  453.16
   1   0   6 1617.77  129.35
   1   0   6 1723.81  128.88
   1   0   6 1520.01   95.48
   1   0   6 1633.18  144.48
  -1   0  -6 1630.96  225.88
  -1   0  -6 1516.04  196.74
   1   0   7 4394.98  214.83
   1   0   7 5284.54  256.12
   1   0   7 4728.69  220.52
  -1   0  -7 4858.23  321.17
  -1   0  -7 4038.38  334.69
   1   0   8 5539.79  265.61
   1   0   8 6591.39  305.85
   1   0   8 6222.22  288.27
  -1   0  -8 6175.94  427.70
  -1   0  -8 5270.37  351.74
   1   0   9 2954.88  139.77
   1   0   9 3241.10  133.50
   1   0   9 2940.69  141.17
  -1   0  -9 3102.27  279.71
  -1   0  -9 2517.03  268.78
   1   0  10  220.69  116.44
   1   0  10  249.22   77.05
  -1   0 -10  294.79  255.09
  -1   0 -10  201.00  252.81
   1   0  11 1279.91  127.63
   1   0  11 1467.31  138.54
  -1   0 -11 1588.12  311.02
  -1   0 -11 1460.82  445.45
   1   0  12   29.66   73.38
  -1   0 -12   19.50   86.79
  -1   0 -12   60.22  163.65
   1   0  13  516.25   86.49
  -1   0 -13  689.29  302.50
   1   0  14  556.85  269.38
  -1   0 -14  727.24  321.45
   1   0  15 1810.46  332.80
  -1   0 -15 2117.84  453.38
   1   0  16   33.22  177.67
  -1   0 -16   22.20  108.65
   1   0  17  222.02  240.08
  -1   0 -17  181.58  267.36
   1   0  18 1003.47  300.39
   1   1 -17 1172.57  495.56
  -1  -1  17 1154.24  384.92
   1   1 -16   77.80  218.46
  -1  -1  16   85.02  206.41
   1   1 -15  230.99  321.56
  -1  -1  15  150.16  204.14
   1   1 -14 2259.37  501.40
  -1  -1  14 1925.32  466.42
   1   1 -13  821.98  471.67
  -1  -1  13  653.94  353.25
   1   1 -12 3957.85  264.62
   1   1 -12 4695.07  622.31
  -1  -1  12 4430.62  510.15
   1   1 -1111742.57  364.84
   1   1 -1111991.80  932.87
  -1  -1  1111751.34  590.95
   1   1 -10   51.01   76.47
   1   1 -10   21.25   76.70
  -1  -1  10   38.97   40.73
  -1  -1  10  219.05  257.95
   1   1  -9 4860.36  260.59
   1   1  -9 4284.73  498.41
  -1  -1   9 5098.23  226.54
  -1  -1   9 4088.07  328.86
   1   1  -8  175.30  109.09
   1   1  -8  226.60  253.83
  -1  -1   8  201.93   68.89
  -1  -1   8  132.21  165.74
   1   1  -7 1197.31  156.47
   1   1  -7 1143.94  165.57
  -1  -1   7 1253.34   99.19
  -1  -1   7 1084.22  215.25
   1   1  -6 8253.53  382.94
   1   1  -6 8202.38  456.61
  -1  -1   6 8407.43  366.08
  -1  -1   6 7403.82  415.78
   1   1  -5 6880.30  260.72
   1   1  -5 7371.79  372.79
   1   1  -5 7908.69  316.10
  -1  -1   5 7760.54  267.23
  -1  -1   5 7356.67  356.10
   1   1  -4 5577.48  210.45
   1   1  -4 6433.20  248.06
   1   1  -4 5694.11  276.74
  -1  -1   4 6633.73  250.63
  -1  -1   4 5820.32  291.28
  -1  -1   4 6079.90  201.96
   1   1  -3 4966.59  207.34
   1   1  -3 6064.29  259.93
   1   1  -3 5431.37  209.22
  -1  -1   3 6111.32  230.98
  -1  -1   3 5734.23  288.36
  -1  -1   3 6149.54  245.94
   1   1  -214177.16  380.24
   1   1  -213953.66  425.49
  -1  -1   217924.18  454.58
  -1  -1   215958.86  437.51
  -1  -1   215936.01  507.60
   1   1  -1 4002.08  202.95
   1   1  -1 4127.96  295.83
   1   1  -1 3684.23  223.88
  -1  -1   1 4885.37  218.44
  -1  -1   1 4455.19  437.20
  -1  -1   1 4677.54  177.67
   1   1   0 2856.53  258.35
   1   1   0 4148.38  603.96
   1   1   0 3211.19  310.44
  -1  -1   0 3291.73  310.57
  -1  -1   0 2952.52  561.46
  -1  -1   0 3435.73  230.43
   1   1   115408.83  481.97
   1   1   118676.05  590.80
  -1  -1  -116505.63  447.04
  -1  -1  -115553.29  593.84
  -1  -1  -116975.83  440.96
  -1  -1  -231153.64  865.09
  -1  -1  -230152.12  820.12
  -1  -1  -228011.76  818.16
   1   1   4  160.99  100.97
   1   1   4  148.90  120.55
   1   1   4  112.70   93.64
  -1  -1  -4  109.92   86.94
  -1  -1  -4   58.15  113.52
  -1  -1  -4   64.17   78.46
   1   1   525351.06  699.92
  -1  -1  -523419.69  554.01
  -1  -1  -523604.53  703.93
   1   1   6  825.61   96.65
   1   1   6  798.59  117.18
   1   1   6  884.01   83.55
  -1  -1  -6  959.73  116.68
  -1  -1  -6  825.94  254.95
  -1  -1  -6  837.90   71.51
   1   1   7 1965.11  125.45
   1   1   7 2185.15  127.54
   1   1   7 2388.89  138.43
  -1  -1  -7 2390.12  213.64
  -1  -1  -7 1798.52  238.11
   1   1   8 2277.15  160.52
   1   1   8 2616.75  136.21
   1   1   8 2713.43  165.21
  -1  -1  -8 2872.90  296.55
  -1  -1  -8 2254.32  366.01
   1   1   9 2581.34  127.49
   1   1   9 2856.52  101.26
   1   1   9 2926.16  158.60
  -1  -1  -9 3263.77  310.68
  -1  -1  -9 2556.04  438.90
   1   1  10  910.33  120.03
   1   1  10  938.16   79.47
  -1  -1 -10  981.76  276.60
  -1  -1 -10  814.81  327.60
   1   1  11 1150.64  116.61
   1   1  11 1242.42  104.24
  -1  -1 -11 1431.67  521.49
  -1  -1 -11 1111.25  389.09
   1   1  12 5236.53  165.97
  -1  -1 -12 5977.86  612.09
  -1  -1 -12 4868.62  463.26
  -1  -1 -1315925.89  981.22
  -1  -1 -1315771.47 1150.28
  -1  -1 -14 3467.95  373.39
  -1  -1 -14 3797.98  502.05
  -1  -1 -15 1306.83  686.75
   1   1  16   24.88  113.52
  -1  -1 -16   -5.12  119.01
   1   1  17  366.03  288.43
  -1  -1 -17  345.22  355.64
   1   1  18  143.40  225.34
  -1  -2  17  176.66  242.26
   1   2 -16   80.94  176.75
  -1  -2  16  188.31  295.61
   1   2 -15  505.49  674.57
  -1  -2  15  521.86  303.15
   1   2 -14 2022.06  447.42
  -1  -2  14 1951.77  400.47
   1   2 -13 1570.58  210.04
   1   2 -13 2075.11  799.73
  -1  -2  13 1946.26  458.17
   1   2 -12 2404.84  266.86
   1   2 -12 2988.11  615.43
  -1  -2  12 2860.79  446.86
   1   2 -11  393.46  386.92
   1   2 -11  563.85  361.25
  -1  -2  11  464.23  321.88
   1   2 -10 1036.05  274.23
   1   2 -10  916.65  635.38
  -1  -2  10  947.92  314.46
   1   2  -9 2316.94  268.90
   1   2  -9 1892.84  235.51
  -1  -2   9 1903.40  331.56
   1   2  -815768.54  334.98
   1   2  -814684.99  691.72
  -1  -2   813797.74  664.81
   1   2  -712164.02  357.39
   1   2  -711589.66  548.92
  -1  -2   712649.23  302.55
  -1  -2   711188.78  466.53
   1   2  -621076.44 1385.67
   1   2  -620008.39  911.82
  -1  -2   623442.21 1519.60
  -1  -2   621869.95 1471.80
   1   2  -5 7150.80  285.40
   1   2  -5 8328.44  351.57
  -1  -2   5 9426.92  313.80
  -1  -2   5 8780.02  397.58
   1   2  -4 7378.39  276.78
   1   2  -4 8384.54  280.88
   1   2  -4 7847.10  284.91
  -1  -2   4 8348.58  348.32
  -1  -2   4 8694.55  409.84
  -1  -2   4 8271.57  255.25
   1   2  -3 9375.97  312.77
   1   2  -311763.73  364.45
   1   2  -3 9306.54  319.24
  -1  -2   311283.24  412.62
  -1  -2   3 9582.71  381.24
  -1  -2   310571.38  307.84
   1   2  -2 1785.27  188.76
   1   2  -2 2314.98  203.25
   1   2  -2 1829.04  357.92
  -1  -2   2 2096.60  225.69
  -1  -2   2 1471.39  230.80
  -1  -2   2 2133.07  117.78
   1   2  -113269.93  380.09
   1   2  -114838.36  503.43
   1   2  -112764.11  387.98
  -1  -2   115001.64  444.27
  -1  -2   113142.97  561.91
  -1  -2   114640.46  389.80
   1   2   080375.20 2204.70
  -1  -2   076230.62 2112.17
  -1  -2   075135.12 2041.84
   1   2   1 5080.39  262.25
   1   2   1 5463.10  264.56
   1   2   1 6087.39  214.27
  -1  -2  -1 5017.20  227.22
  -1  -2  -1 5123.08  255.73
  -1  -2  -1 5897.21  221.00
   1   2   2 3649.22  156.34
   1   2   2 4553.89  200.70
   1   2   2 4624.69  175.91
  -1  -2  -2 4342.91  194.04
  -1  -2  -2 4124.66  217.32
  -1  -2  -2 4757.33  202.28
   1   2   315908.52  438.31
   1   2   314555.70  357.53
  -1  -2  -314025.29  354.77
  -1  -2  -314084.26  413.79
  -1  -2  -315121.93  392.70
   1   2   4 1883.19  124.04
   1   2   4 1856.84  169.31
   1   2   4 1819.63   98.89
  -1  -2  -4 1790.88  114.21
  -1  -2  -4 1512.30  151.31
  -1  -2  -4 1855.18   98.43
   1   2   551424.83 1408.91
   1   2   550297.88 1366.47
   1   2   558900.24 1626.68
  -1  -2  -550543.10 1387.23
  -1  -2  -547414.22 1334.61
   1   2   6 5077.46  194.34
   1   2   6 5286.27  193.89
  -1  -2  -6 5188.14  218.60
  -1  -2  -6 5115.74  175.09
  -1  -2  -6 4463.97  231.68
   1   2   715989.04  651.70
   1   2   718370.58  749.61
  -1  -2  -716623.44  711.58
  -1  -2  -714861.42  598.04
  -1  -2  -717089.47  751.83
   1   2   8 3492.15  109.62
   1   2   8 3546.19  153.50
  -1  -2  -8 3408.57  171.98
  -1  -2  -8 3205.30  279.11
   1   2   9 1536.15  120.41
   1   2   9 1804.09   98.47
   1   2   9 1744.76  132.65
  -1  -2  -9 1936.22  190.61
  -1  -2  -9 1547.68  339.87
   1   2  10   26.61   28.08
  -1  -2 -10   38.71  121.26
  -1  -2 -10   20.32   90.76
   1   2  11 5705.84  359.31
   1   2  11 5797.44  360.92
  -1  -2 -11 6839.57  579.54
  -1  -2 -11 5022.16  631.01
  -1  -2 -12   33.47  103.12
  -1  -2 -12   55.10  160.55
  -1  -2 -13   43.53  109.11
  -1  -2 -13   71.17  110.69
  -1  -2 -14 6570.83  491.98
  -1  -2 -14 6319.20  570.13
  -1  -2 -15   38.74  116.99
  -1  -2 -15   40.84  254.28
  -1  -2 -16  139.58  148.69
   1   2  17   80.42  184.89
  -1  -2 -17   15.16   88.62
   1   2  18   89.65  228.02
   1   3 -16 5221.43  618.58
  -1  -3  16 5298.18  479.19
   1   3 -15   49.44  131.55
  -1  -3  15    7.55  147.18
   1   3 -14  859.29  494.10
  -1  -3  14  801.83  349.96
   1   3 -13  861.61  315.74
   1   3 -13 1165.26  809.15
  -1  -3  13 1222.05  392.75
   1   3 -12    4.75   39.98
   1   3 -12   -3.11  116.81
  -1  -3  12   31.45  208.52
   1   3 -11  216.81  238.27
   1   3 -11  298.87  381.45
  -1  -3  11  186.48  310.09
   1   3 -10 5449.82  472.19
   1   3 -10 5087.93  601.18
  -1  -3  10 5660.12  473.64
   1   3  -9  782.88  200.04
   1   3  -9  700.98  310.77
  -1  -3   9  890.47  319.59
   1   3  -8 7964.39  402.08
   1   3  -8 6912.76  526.47
  -1  -3   8 7808.34  491.03
   1   3  -7 2553.16  222.17
   1   3  -7 2439.13  388.44
  -1  -3   7 2208.25  240.60
   1   3  -6   55.49  124.15
   1   3  -6   20.45   62.97
  -1  -3   6  135.92  234.25
   1   3  -515374.26  673.01
   1   3  -514716.68  731.20
  -1  -3   517741.23  816.49
   1   3  -4  577.30  155.68
   1   3  -4  533.35  125.64
   1   3  -4  684.15  131.30
  -1  -3   4  717.52  106.31
  -1  -3   4  636.23  225.06
   1   3  -3 1138.26  156.22
   1   3  -3 1459.52  176.92
   1   3  -3 1031.66  166.67
  -1  -3   3 1290.65  124.42
  -1  -3   3  904.09  205.84
  -1  -3   3 1335.59  112.70
   1   3  -224191.62  728.18
  -1  -3   226666.80  770.04
  -1  -3   223093.57  636.10
   1   3  -111785.97  357.07
   1   3  -114069.64  402.09
  -1  -3   112854.73  364.77
  -1  -3   111106.60  371.47
  -1  -3   111107.35  359.49
   1   3   0 6055.95  234.72
   1   3   0 7745.01  283.67
  -1  -3   0 7024.39  227.12
  -1  -3   0 5885.78  227.31
  -1  -3   0 6105.75  277.23
  -1  -3   0 6817.26  239.61
   1   3   1 4295.86  194.45
   1   3   1 5678.38  241.12
   1   3   1 5493.57  186.39
  -1  -3  -1 4723.88  187.34
  -1  -3  -1 5004.42  245.62
  -1  -3  -1 5497.59  208.57
   1   3   210920.50  335.33
   1   3   214297.66  413.85
   1   3   213307.27  358.76
  -1  -3  -211129.80  312.73
  -1  -3  -213039.94  397.85
  -1  -3  -212750.20  348.23
   1   3   3 6432.72  247.82
   1   3   3 6571.44  213.43
  -1  -3  -3 5594.49  191.67
  -1  -3  -3 5330.71  230.92
  -1  -3  -3 5878.17  193.47
   1   3   4 1102.16  134.92
   1   3   4 1090.30  149.45
   1   3   4 1012.85   93.76
  -1  -3  -4  969.47  120.05
  -1  -3  -4  840.51  151.34
  -1  -3  -4 1116.04   81.88
   1   3   5 6579.31  260.89
   1   3   5 7470.40  260.59
  -1  -3  -5 6707.92  257.42
  -1  -3  -5 7314.20  235.21
  -1  -3  -5 6307.98  412.60
   1   3   620901.92 1356.97
   1   3   622621.67 1465.99
  -1  -3  -620307.92  858.05
  -1  -3  -619474.68  782.52
  -1  -3  -620423.79  868.31
   1   3   712364.91  511.79
   1   3   715732.25  656.13
  -1  -3  -713693.02  608.47
  -1  -3  -714235.03  579.78
  -1  -3  -713544.22  755.19
   1   3   8 7420.90  184.38
   1   3   8 8078.05  254.05
  -1  -3  -8 7944.02  286.96
  -1  -3  -8 7723.92  183.99
  -1  -3  -8 7104.02  490.14
   1   3   9 2298.58  124.04
  -1  -3  -9 2430.35  116.98
  -1  -3  -9 2338.98  194.02
  -1  -3  -9 2130.45  362.28
   1   3  10 1528.69  116.01
   1   3  10 1691.63  120.32
  -1  -3 -10 1735.63  207.47
  -1  -3 -10 1376.66  375.76
  -1  -3 -11 1298.51  200.45
  -1  -3 -11 1060.34  490.29
  -1  -3 -12  553.35  192.28
  -1  -3 -12  476.63  461.38
  -1  -3 -13 6177.45  481.54
  -1  -3 -13 5261.05  700.92
  -1  -3 -14 3523.73  491.04
  -1  -3 -14 3188.56  507.88
  -1  -3 -15 4148.64  563.70
  -1  -3 -15 4063.10  697.54
  -1  -3 -16   20.12   85.14
  -1  -3 -16   79.28  215.75
  -1  -3 -17   57.96  100.70
   1   3  18   46.20  201.91
   1   4 -16  326.67  558.29
  -1  -4  16  596.53  422.47
   1   4 -15 1779.78  519.35
  -1  -4  15 2030.92  355.19
   1   4 -14  850.04  788.79
  -1  -4  14 1194.83  389.37
   1   4 -13 2026.49  264.10
   1   4 -13 2369.37  580.71
  -1  -4  13 2723.96  467.24
   1   4 -12  105.68  168.15
   1   4 -12  133.30  282.70
  -1  -4  12  183.78  228.80
   1   4 -11  622.07  465.03
   1   4 -11  818.65  480.60
  -1  -4  11  646.86  310.31
   1   4 -10 2602.25  385.14
   1   4 -10 2478.23  405.98
  -1  -4  10 2780.28  403.34
   1   4  -9 4477.06  310.78
   1   4  -9 3816.94  622.26
  -1  -4   9 5030.00  458.02
   1   4  -8 1517.57  278.88
   1   4  -8 1187.31  433.43
  -1  -4   8 1539.42  316.58
   1   4  -7  937.42  213.33
   1   4  -7  974.63  351.63
  -1  -4   7 1169.17  280.55
   1   4  -6   10.01   96.67
   1   4  -6   44.26  101.98
  -1  -4   6   87.86  169.51
   1   4  -5  518.50  152.55
   1   4  -5  540.66  161.67
  -1  -4   5  440.92  172.74
   1   4  -4 8385.47  429.16
  -1  -4   4 9039.84  446.56
  -1  -4   4 7215.91  398.84
   1   4  -3 6832.87  374.17
   1   4  -3 8367.70  423.10
  -1  -4   3 6347.40  386.68
  -1  -4   3 7443.06  393.51
   1   4  -2 2952.89  188.30
   1   4  -2 3371.70  212.03
  -1  -4   2 2501.67  215.43
  -1  -4   2 2981.53  223.58
   1   4  -1 5310.99  273.81
   1   4  -1 5492.28  255.49
  -1  -4   1 5450.78  310.54
  -1  -4   1 4369.42  268.02
  -1  -4   1 5168.51  268.71
   1   4   0 6055.41  288.31
   1   4   0 6623.75  267.19
   1   4   0 6781.93  259.23
  -1  -4   0 6267.40  274.35
  -1  -4   0 5467.48  285.07
  -1  -4   0 6551.47  261.57
   1   4   1 5622.77  279.49
   1   4   1 6435.86  260.64
   1   4   1 6362.91  239.26
  -1  -4  -1 5897.31  251.73
  -1  -4  -1 5224.29  259.21
  -1  -4  -1 6557.29  251.79
   1   4   2    6.54   91.98
   1   4   2   46.74  100.50
   1   4   2   38.02   88.18
  -1  -4  -2   21.76   72.10
  -1  -4  -2   26.93  127.33
  -1  -4  -2   21.45   61.87
   1   4   311658.04  400.36
   1   4   311720.13  380.68
  -1  -4  -3 9411.62  334.97
  -1  -4  -3 9880.68  383.39
  -1  -4  -310644.18  342.82
   1   4   4 3516.00  201.99
   1   4   4 3913.86  184.27
  -1  -4  -4 3432.79  190.95
  -1  -4  -4 3871.63  165.05
  -1  -4  -4 3107.72  214.34
   1   4   5  349.99  113.39
   1   4   5  372.15   92.74
  -1  -4  -5  316.84  135.64
  -1  -4  -5  370.44   84.30
  -1  -4  -5  353.84  166.65
   1   4   6 8835.60  410.92
   1   4   6 8620.94  388.17
  -1  -4  -6 8575.88  413.42
  -1  -4  -6 9106.11  389.93
  -1  -4  -6 7857.58  530.14
   1   4   7 1766.76  120.73
   1   4   7 1740.19  123.13
  -1  -4  -7 1776.25  163.17
  -1  -4  -7 1761.06   94.65
  -1  -4  -7 1690.15  312.91
   1   4   8 1535.96  111.41
  -1  -4  -8 1597.46   95.80
  -1  -4  -8 1681.60  178.43
  -1  -4  -8 1457.06  291.54
   1   4   9 3102.44  156.41
  -1  -4  -9 3409.99  146.91
  -1  -4  -9 3498.05  244.22
  -1  -4  -9 2968.76  291.69
   1   4  10  794.51   60.45
  -1  -4 -10  887.26   47.94
  -1  -4 -10  876.81  200.18
  -1  -4 -10  787.11  378.32
  -1  -4 -11   -1.40   88.21
  -1  -4 -11   17.69   95.11
  -1  -4 -12  969.50  181.70
  -1  -4 -12  954.85  547.24
  -1  -4 -13 4856.81  358.94
  -1  -4 -13 4498.37  491.47
  -1  -4 -14 5517.95  591.84
  -1  -4 -14 5012.18  857.45
  -1  -4 -15 2223.24  556.29
  -1  -4 -15 2080.80  406.04
  -1  -4 -16   48.56  101.53
  -1  -4 -16   -0.69  123.55
  -1  -4 -17   36.85   70.80
  -1  -4 -17  156.88  274.49
  -1  -5  15 1993.09  449.11
   1   5 -14  990.90  186.16
  -1  -5  14 1270.43  317.78
   1   5 -13 1023.78  455.00
   1   5 -13 1186.88  344.18
  -1  -5  13 1257.32  337.20
   1   5 -12  172.60  228.49
   1   5 -12  150.16  224.66
  -1  -5  12  285.05  273.10
   1   5 -11 1991.90  289.63
   1   5 -11 1784.85  358.03
  -1  -5  11 2024.26  364.19
   1   5 -10  110.94  128.84
   1   5 -10   68.18  220.18
  -1  -5  10  134.24  281.02
   1   5  -9  305.46  283.74
  -1  -5   9  182.54  275.82
   1   5  -8 1406.21  273.41
  -1  -5   8 1345.07  340.58
   1   5  -7 1330.89  263.84
  -1  -5   7 1287.25  237.06
  -1  -5   7 1295.02  283.15
   1   5  -6 1584.95  257.60
  -1  -5   6 1887.36  206.87
  -1  -5   6 2058.04  321.93
   1   5  -5   63.65  163.42
  -1  -5   5   51.32  150.74
  -1  -5   5   88.63  191.06
   1   5  -412113.52  410.30
  -1  -5   411979.99  417.55
  -1  -5   411865.21  446.33
   1   5  -3 3741.97  260.65
  -1  -5   3 3845.21  282.28
  -1  -5   3 4054.52  272.00
   1   5  -2 4222.26  251.18
  -1  -5   2 4544.04  298.66
  -1  -5   2 4745.65  359.84
   1   5  -1  421.81  151.83
   1   5  -1  401.56  144.05
  -1  -5   1  367.12  161.32
  -1  -5   1  410.25  141.92
   1   5   0 6577.78  356.84
   1   5   0 6998.62  353.88
  -1  -5   0 6405.39  354.13
  -1  -5   0 5578.95  312.84
   1   5   1  337.60  154.82
   1   5   1  506.13  159.97
  -1  -5  -1  303.23  159.39
  -1  -5  -1  360.39  163.67
   1   5   2 5386.06  312.00
  -1  -5  -2 5191.23  283.39
  -1  -5  -2 5643.47  320.60
   1   5   3  770.12  139.01
  -1  -5  -3  779.21  171.21
  -1  -5  -3  722.24  181.77
   1   5   412314.52  549.70
  -1  -5  -414043.63  593.34
  -1  -5  -411268.33  509.91
  -1  -5  -412277.34  571.51
   1   5   5 3260.07  199.53
  -1  -5  -5 3425.85  142.27
  -1  -5  -5 3163.63  199.30
  -1  -5  -5 2817.34  209.77
   1   5   6 4025.00  202.61
  -1  -5  -6 4344.14  156.44
  -1  -5  -6 4095.53  224.77
  -1  -5  -6 3768.19  333.47
   1   5   7 2458.09  178.25
  -1  -5  -7 2689.82  148.57
  -1  -5  -7 2789.86  232.88
  -1  -5  -7 2326.29  232.55
   1   5   8  209.09   83.22
  -1  -5  -8  253.32   60.65
  -1  -5  -8  257.85  147.77
  -1  -5  -8  284.13  247.49
   1   5   920656.53  264.87
  -1  -5  -921902.44  211.27
  -1  -5  -923999.90  490.99
  -1  -5  -921160.00  610.46
   1   5  10 4395.40  159.22
  -1  -5 -10 4640.48  157.88
  -1  -5 -10 4838.88  305.93
  -1  -5 -10 3949.83  336.27
   1   5  11  885.11   42.66
  -1  -5 -11 1698.40  221.02
  -1  -5 -11 1596.33  588.47
  -1  -5 -12 1289.98  183.06
  -1  -5 -12 1335.59  438.52
  -1  -5 -13 3055.60  297.50
  -1  -5 -13 2658.27  645.08
  -1  -5 -14   93.60  180.51
  -1  -5 -14   44.79  159.04
  -1  -5 -15 1231.74  262.11
  -1  -5 -15  916.65  745.94
  -1  -5 -16  362.52  166.70
  -1  -5 -16  250.36  465.06
  -1  -5 -17  728.39  826.36
   1   6 -14   35.24   66.15
  -1  -6  14   84.38  208.56
  -1  -6  14    4.50  128.40
   1   6 -13   32.80  103.67
  -1  -6  13   38.30  195.16
  -1  -6  13    2.98  129.78
   1   6 -12  905.54  609.98
  -1  -6  12 1304.92  418.53
  -1  -6  12 1074.12  298.86
   1   6 -11 1463.36  709.78
  -1  -6  11 1686.17  379.20
  -1  -6  11 1542.93  348.29
   1   6 -10 3917.82  450.35
  -1  -6  10 4172.55  473.70
  -1  -6  10 3687.09  440.59
   1   6  -9 1783.08  361.68
  -1  -6   9 1705.49  278.68
  -1  -6   9 1578.58  348.66
   1   6  -8 7312.28  560.46
  -1  -6   8 7308.70  555.48
  -1  -6   8 6749.47  550.74
   1   6  -7 9727.85  500.53
  -1  -6   7 8327.73  404.35
  -1  -6   7 9530.42  533.96
   1   6  -6 2144.68  346.13
  -1  -6   6 2436.12  308.84
  -1  -6   6 2451.04  378.79
   1   6  -4 7127.93  428.60
  -1  -6   4 7851.09  431.50
  -1  -6   4 8645.53  537.78
   1   6  -3 3195.90  296.69
  -1  -6   3 3538.14  260.39
  -1  -6   3 3729.31  368.97
   1   6  -2 1264.28  236.58
  -1  -6   2 1328.04  211.21
  -1  -6   2 1286.78  249.22
   1   6  -1 9932.65  352.74
  -1  -6   1 9782.62  368.92
  -1  -6   110640.00  412.50
   1   6   0 5373.53  302.71
  -1  -6   0 5680.24  291.98
  -1  -6   0 6005.58  318.64
   1   6   1 6650.58  335.97
  -1  -6  -1 6936.47  295.66
  -1  -6  -1 6992.65  316.16
   1   6   2   49.85  104.37
  -1  -6  -2   38.20  117.05
  -1  -6  -2   26.25  120.92
   1   6   314132.34  418.60
  -1  -6  -315242.20  432.87
  -1  -6  -314344.10  423.58
   1   6   4  138.01  121.85
  -1  -6  -4  107.15  180.85
  -1  -6  -4  101.76  137.04
   1   6   5 8004.61  399.37
  -1  -6  -5 7951.64  398.26
  -1  -6  -5 6568.90  365.88
   1   6   6  853.20  174.93
  -1  -6  -6  954.88  187.76
  -1  -6  -6  794.47  507.49
   1   6   7 8673.02  592.07
  -1  -6  -7 9055.53  651.41
  -1  -6  -7 7905.23  738.18
   1   6   8 1157.74  142.89
  -1  -6  -8 1259.05  122.71
  -1  -6  -8 1223.69  204.62
  -1  -6  -8 1089.26  351.40
   1   6   9 2122.26  163.70
  -1  -6  -9 2059.28  107.23
  -1  -6  -9 2309.15  240.77
  -1  -6  -9 2014.81  253.74
   1   6  10 1873.87  120.46
  -1  -6 -10 1999.98  231.02
  -1  -6 -10 2076.50  321.78
  -1  -6 -11 1471.57  198.45
  -1  -6 -11 1491.41  533.39
  -1  -6 -12  741.39  194.74
  -1  -6 -12  701.69  524.81
  -1  -6 -13 1747.80  278.15
  -1  -6 -13 1849.45  378.80
  -1  -6 -14 1313.29  245.05
  -1  -6 -14 1362.21  781.40
  -1  -6 -15 4965.10  386.71
  -1  -6 -15 4640.10  545.70
  -1  -6 -16  642.33  184.42
  -1  -6 -16  381.36  649.69
  -1  -6 -17  551.57  541.46
   1   7 -13   40.40   84.90
  -1  -7  13   75.84  211.81
  -1  -7  13    8.10  100.82
   1   7 -12  174.66  322.17
  -1  -7  12  394.47  249.21
  -1  -7  12  192.95  225.32
   1   7 -11   48.03  128.26
  -1  -7  11   61.94  262.92
  -1  -7  11   -6.16  120.12
   1   7 -10  428.86  472.36
  -1  -7  10  546.61  320.89
  -1  -7  10  456.16  230.77
   1   7  -9  276.38  312.49
  -1  -7   9  261.66  220.72
  -1  -7   9  221.42  235.68
   1   7  -8   15.67   84.06
  -1  -7   8   39.77  212.67
  -1  -7   8   49.39  191.53
   1   7  -7 2938.15  411.93
  -1  -7   7 3192.94  327.14
  -1  -7   7 2937.47  368.18
   1   7  -6 3608.64  689.13
  -1  -7   6 3936.00  329.47
  -1  -7   6 3580.20  335.49
   1   7  -5 4586.98  444.34
  -1  -7   5 4432.78  325.50
  -1  -7   5 4809.74  384.64
   1   7  -4 3113.00  362.08
  -1  -7   4 2719.26  298.17
  -1  -7   4 3366.75  384.93
   1   7  -3   59.26  202.81
  -1  -7   3  109.20  227.12
  -1  -7   3   50.34  177.68
   1   7  -2 4427.30  382.04
  -1  -7   2 4369.25  392.72
  -1  -7   2 4982.29  450.11
   1   7  -1  332.75  174.72
  -1  -7   1  316.21  188.85
  -1  -7   1  322.92  197.86
   1   7   0  305.75  181.48
  -1  -7   0  318.46  206.31
  -1  -7   0  263.89  198.30
   1   7   1  199.84  160.20
  -1  -7  -1  264.48  193.76
  -1  -7  -1  234.59  197.66
   1   7   2 1247.36  219.75
  -1  -7  -2 1320.57  209.35
  -1  -7  -2 1617.44  225.42
   1   7   3 2310.97  227.50
  -1  -7  -3 2081.69  224.14
  -1  -7  -3 2451.17  260.99
   1   7   4  413.65  208.86
  -1  -7  -4  345.30  190.61
  -1  -7  -4  370.51  166.87
   1   7   514372.84  973.21
  -1  -7  -513653.70  922.38
  -1  -7  -513333.97  907.84
   1   7   6 2041.99  274.28
  -1  -7  -6 2258.84  276.66
  -1  -7  -6 2072.03  332.02
   1   7   7  742.25  151.16
  -1  -7  -7  801.63  208.33
  -1  -7  -7  856.69  586.90
   1   7   8  946.09  174.89
  -1  -7  -8  946.60  203.08
  -1  -7  -8  980.82  723.62
   1   7   9   21.85   88.03
  -1  -7  -9   19.69  108.67
  -1  -7  -9   21.86   88.54
   1   7  10 5203.63  298.39
  -1  -7 -10 6278.31  450.33
  -1  -7 -10 5896.43  578.45
  -1  -7 -11 3756.79  342.86
  -1  -7 -11 3595.96  710.05
  -1  -7 -12 4559.54  537.91
  -1  -7 -12 4289.26  788.31
  -1  -7 -13   24.82  171.99
  -1  -7 -13   -0.88  163.30
  -1  -7 -14 1970.35  258.13
  -1  -7 -14 1953.28  387.32
  -1  -7 -15   63.42  115.97
  -1  -7 -15    2.38   93.71
  -1  -7 -16   36.31  113.11
  -1  -7 -16   16.41   98.31
   1   8 -12  -15.66  109.65
  -1  -8  12   39.86  156.55
   1   8 -11  142.52  187.47
  -1  -8  11  213.12  305.99
  -1  -8  11  205.51  175.70
   1   8 -10  218.39  292.23
  -1  -8  10  350.10  364.80
  -1  -8  10  188.94  246.47
   1   8  -9  449.36  560.34
  -1  -8   9  704.82  423.23
  -1  -8   9  481.30  269.24
   1   8  -8  380.25  426.58
  -1  -8   8  444.57  313.75
  -1  -8   8  422.74  208.32
   1   8  -7 3890.38  776.45
  -1  -8   7 4077.34  421.55
  -1  -8   7 3551.83  355.50
   1   8  -6  309.15  264.25
  -1  -8   6  262.36  239.46
  -1  -8   6  262.03  199.36
   1   8  -5 9071.93  825.06
  -1  -8   5 9011.45  635.93
  -1  -8   5 8086.55  522.85
   1   8  -4  721.62  331.32
  -1  -8   4  724.59  271.99
  -1  -8   4  754.94  201.61
   1   8  -3    0.62  152.55
  -1  -8   3   -7.59  124.68
  -1  -8   3    6.59   77.87
   1   8  -2  479.31  249.91
  -1  -8   2  545.22  246.05
  -1  -8   2  571.03  210.70
   1   8  -1 1001.41  237.35
  -1  -8   1  962.03  259.33
  -1  -8   1 1127.01  252.00
   1   8   0 2515.60  289.71
  -1  -8   0 2612.03  285.77
  -1  -8   0 3169.13  317.06
   1   8   1   66.59  143.85
  -1  -8  -1   66.18  150.65
  -1  -8  -1   59.05  202.58
   1   8   2 7119.61  604.45
  -1  -8  -2 6138.43  518.45
  -1  -8  -2 7080.96  557.99
   1   8   3  497.17  229.00
  -1  -8  -3  504.05  221.84
  -1  -8  -3  481.47  220.57
   1   8   4    5.59  122.14
  -1  -8  -4   94.38  213.51
  -1  -8  -4    8.59   97.15
   1   8   5 2155.88  273.85
  -1  -8  -5 2291.43  269.98
  -1  -8  -5 1938.01  276.01
   1   8   6 2518.30  292.93
  -1  -8  -6 2720.38  284.58
  -1  -8  -6 2615.28  423.23
   1   8   7 4297.09  379.42
  -1  -8  -7 4535.67  373.26
  -1  -8  -7 4432.11  547.99
   1   8   8 2832.08  360.84
  -1  -8  -8 2828.30  309.46
  -1  -8  -8 3004.05  663.16
   1   8   9 2208.24  292.77
  -1  -8  -9 2396.43  284.65
  -1  -8  -9 2586.74  645.85
   1   8  10   18.09   56.11
  -1  -8 -10   76.61  184.44
  -1  -8 -10   15.08  117.81
  -1  -8 -11  473.17  206.97
  -1  -8 -11  516.80  534.00
  -1  -8 -12   60.29  209.00
  -1  -8 -12   61.46  133.78
  -1  -8 -13  539.63  202.34
  -1  -8 -13  408.17  550.16
  -1  -8 -14 8967.83  613.39
  -1  -8 -14 8522.91  816.79
  -1  -8 -15  676.65  188.28
  -1  -8 -15  603.01  521.52
   1   9 -11  183.40  306.11
  -1  -9  11  294.81  286.58
   1   9 -10   19.63   70.00
  -1  -9  10   50.42  172.46
   1   9  -9  -17.68  138.00
  -1  -9   9   65.63  287.70
   1   9  -8 2597.13  900.41
  -1  -9   8 2561.54  481.21
  -1  -9   8 2647.86  458.43
   1   9  -7  117.52  197.52
  -1  -9   7  252.80  310.15
  -1  -9   7  225.84  190.26
   1   9  -6 2618.08  574.36
  -1  -9   6 2631.38  426.63
  -1  -9   6 2349.60  355.74
   1   9  -5  166.06  219.11
  -1  -9   5  289.10  254.94
  -1  -9   5  276.00  195.79
   1   9  -4 4913.21  816.92
  -1  -9   4 4581.03  429.72
  -1  -9   4 4174.09  342.53
   1   9  -3  144.87  258.08
  -1  -9   3   12.83  164.05
  -1  -9   3  139.80  146.54
   1   9  -215231.52  932.93
  -1  -9   214393.17  979.95
  -1  -9   214547.56  844.10
   1   9  -1   33.71  139.52
  -1  -9   1   37.55  144.08
  -1  -9   1   -1.48   84.69
   1   9   0  330.56  248.19
  -1  -9   0  237.81  251.28
  -1  -9   0  303.89  171.83
   1   9   1  109.79  239.80
  -1  -9  -1   73.42  126.67
  -1  -9  -1  212.83  213.50
   1   9   2  377.71  302.03
  -1  -9  -2  371.37  252.57
  -1  -9  -2  362.96  213.14
   1   9   3 4937.40  486.26
  -1  -9  -3 5074.00  463.93
  -1  -9  -3 4442.44  384.33
   1   9   4  431.40  399.20
  -1  -9  -4  612.99  262.21
  -1  -9  -4  535.78  219.54
   1   9   5 3183.83  518.12
  -1  -9  -5 3409.25  354.78
  -1  -9  -5 3125.76  339.96
   1   9   6   36.68  123.21
  -1  -9  -6  -23.03  138.05
  -1  -9  -6  -25.75  108.35
   1   9   7   -6.68   90.97
  -1  -9  -7   -2.80  139.59
  -1  -9  -7   28.68   88.75
   1   9   8 1877.30  247.88
  -1  -9  -8 1936.63  265.74
  -1  -9  -8 2156.00  330.76
   1   9   9  217.88  329.31
  -1  -9  -9  290.68  189.62
  -1  -9  -9  373.72  352.04
  -1  -9 -10 1852.41  264.43
  -1  -9 -10 1977.82  499.00
  -1  -9 -11 1600.71  317.95
  -1  -9 -11 1436.28  418.02
  -1  -9 -12   83.10  254.41
  -1  -9 -12   56.33   80.31
  -1  -9 -13 1706.08  230.34
  -1  -9 -13 1783.37  335.19
  -1  -9 -14  -28.89   92.87
  -1  -9 -14  -29.25  143.38
   1  10 -10    2.62  128.65
  -1 -10  10   37.60  220.62
   1  10  -9  311.91  520.88
  -1 -10   9  617.15  331.39
   1  10  -8   49.80  110.20
  -1 -10   8   54.26  180.17
   1  10  -7   54.00  121.64
  -1 -10   7   29.16  168.14
   1  10  -6  369.84  370.94
  -1 -10   6  383.74  274.36
  -1 -10   6  371.25  164.32
   1  10  -5   83.68  168.09
  -1 -10   5  139.41  291.55
  -1 -10   5   86.54  159.85
   1  10  -4 2025.32  537.22
  -1 -10   4 2293.53  411.41
  -1 -10   4 1826.96  324.75
   1  10  -3  959.79  693.72
  -1 -10   3 1000.73  331.52
  -1 -10   3  916.47  240.49
   1  10  -2  614.45  556.85
  -1 -10   2  644.69  350.75
  -1 -10   2  627.70  201.30
   1  10  -1 2151.96  570.42
  -1 -10   1 1959.76  400.23
  -1 -10   1 2051.31  258.76
   1  10   0 4160.33  577.35
  -1 -10   0 3877.97  460.21
  -1 -10   0 3927.72  343.24
   1  10   1  451.82  485.43
  -1 -10  -1  393.03  306.51
  -1 -10  -1  399.56  183.04
   1  10   2 2080.93  702.39
  -1 -10  -2 2279.71  397.81
  -1 -10  -2 1997.50  243.63
   1  10   3 2939.78  537.96
  -1 -10  -3 3188.30  412.76
  -1 -10  -3 2783.22  294.56
   1  10   4 3475.27  370.34
  -1 -10  -4 3500.50  401.28
  -1 -10  -4 3420.03  494.98
   1  10   5   32.95  175.82
  -1 -10  -5   28.18  161.72
  -1 -10  -5   36.50  125.60
   1  10   6 2963.16  483.37
  -1 -10  -6 3144.88  434.87
  -1 -10  -6 3198.56  484.37
   1  10   7 3444.71  456.41
  -1 -10  -7 4096.23  526.60
  -1 -10  -7 3798.74  484.22
   1  10   8 2600.53  480.08
  -1 -10  -8 2908.67  372.07
  -1 -10  -8 3013.46  469.84
   1  10   9 3126.40  419.11
  -1 -10  -9 3965.44  542.46
  -1 -10  -9 3919.67  701.17
  -1 -10 -10 1740.83  278.27
  -1 -10 -10 1855.49  317.78
  -1 -10 -11 1127.54  253.12
  -1 -10 -11 1046.17  417.92
  -1 -10 -12 3426.92  291.12
  -1 -10 -12 3245.44  441.47
  -1 -10 -13  979.94  244.84
  -1 -10 -13  751.05  710.67
   1  11  -8   -7.36  122.17
  -1 -11   8   98.56  218.51
   1  11  -7 2524.87  481.11
  -1 -11   7 3077.38  522.62
   1  11  -6    2.63   71.21
  -1 -11   6   45.99  164.49
   1  11  -5 1419.64  678.75
  -1 -11   5 1615.25  351.12
   1  11  -4 1797.60  664.64
  -1 -11   4 2058.89  365.21
   1  11  -3   44.78  142.55
  -1 -11   3  -11.30  131.14
  -1 -11   3   69.92  140.88
   1  11  -2   22.77  137.72
  -1 -11   2   25.19  190.56
  -1 -11   2   48.17  130.91
   1  11  -1 1532.77  649.26
  -1 -11   1 1426.80  295.07
  -1 -11   1 1536.01  264.52
   1  11   0 1370.24  718.85
  -1 -11   0 1376.49  332.91
  -1 -11   0 1316.88  255.19
   1  11   1 2043.77 1028.07
  -1 -11  -1 2213.90  427.52
  -1 -11  -1 2059.15  308.34
   1  11   2  284.69  425.50
  -1 -11  -2  432.74  332.78
  -1 -11  -2  403.53  190.26
   1  11   3 2061.92  386.53
  -1 -11  -3 2089.90  420.20
  -1 -11  -3 1988.28  302.31
   1  11   4  684.73  833.42
  -1 -11  -4  963.14  287.22
  -1 -11  -4 1036.31  597.98
   1  11   5 3619.47  442.18
  -1 -11  -5 3816.78  453.32
  -1 -11  -5 3811.56  445.81
   1  11   6  -21.31   99.69
  -1 -11  -6   64.54  207.07
  -1 -11  -6   36.26  123.76
   1  11   7  628.73  613.79
  -1 -11  -7 1099.94  299.06
  -1 -11  -7 1008.66  770.08
   1  11   8  932.45  358.80
  -1 -11  -8 1269.24  254.51
  -1 -11  -8 1427.45  625.80
  -1 -11  -9   60.44  209.55
  -1 -11  -9   73.03  133.52
  -1 -11 -10 1417.06  256.17
  -1 -11 -10 1309.13  314.77
  -1 -11 -11  325.18  240.60
  -1 -11 -11  222.81  286.86
   1  12  -5  247.74  475.44
  -1 -12   5  527.38  293.06
   1  12  -4   36.11  164.69
  -1 -12   4    2.09  156.37
   1  12  -3  665.97  932.74
  -1 -12   3  972.58  269.99
   1  12  -2    6.25  142.65
  -1 -12   2  -22.11  123.31
   1  12  -1  121.34  269.94
  -1 -12   1  118.55  182.30
   1  12   0  105.69  227.93
  -1 -12   0   58.51  192.31
  -1 -12  -1  389.35  279.14
  -1 -12  -1  311.93  129.62
   1  12   2  444.41  710.64
  -1 -12  -2  845.50  276.98
  -1 -12  -2  751.72  210.66
   1  12   3   58.98  181.21
  -1 -12  -3   52.96  125.37
  -1 -12  -3   76.18  127.00
   1  12   4  158.26  300.83
  -1 -12  -4  399.97  254.91
  -1 -12  -4  310.22  242.76
   1  12   5 1265.54  243.29
  -1 -12  -5 1546.58  326.41
  -1 -12  -5 1471.74  320.04
   1  12   6   13.24   73.67
  -1 -12  -6   25.74  156.67
  -1 -12  -6   29.42   53.04
   1  12   7   41.44  109.28
  -1 -12  -7   -3.56  152.41
  -1 -12  -7   31.13  139.44
  -1 -12  -8   80.76  185.66
  -1 -12  -8    6.98   96.90
  -1 -12  -9   60.88  169.27
  -1 -12  -9   54.38  194.28
   1  13  -1  167.63  308.10
  -1 -13   1  253.82  289.89
   1  13   0 1481.04  503.03
  -1 -13   0 1739.55  394.19
   1  13   1   35.29   89.48
  -1 -13  -1  123.63  230.57
   1  13   2 1100.53  492.36
  -1 -13  -2 1286.44  340.37
   1  13   3  150.56  284.17
  -1 -13  -3  445.63  244.06
   1  13   4   17.14   73.41
  -1 -13  -4  124.07  214.28
   1  13   5 2987.40  556.41
  -1 -13  -5 3699.32  556.45
   2 -12  -6 1155.17  231.66
   2 -12  -6 1190.32  307.76
   2 -12  -5   15.41  129.07
   2 -12  -5   19.31  141.60
   2 -12  -4  516.05  280.74
   2 -12  -3   54.19  229.83
  -2  12   3   36.10  137.34
   2 -12  -2  188.24  229.89
  -2  12   2   66.90  201.52
   2 -12  -1  977.13  328.18
  -2  12   1  642.11  653.77
   2 -12   0  112.80  215.19
  -2  12   0  143.25  330.59
   2 -12   1  278.05  238.96
  -2  12  -1   85.67  268.98
   2 -12   2  130.95  167.41
  -2  12  -2   16.88   92.68
   2 -12   3  104.46  210.40
  -2  12  -3  147.24  277.03
   2 -12   4  156.86  302.50
  -2  12  -4    7.65  117.33
   2 -12   5  411.85  277.34
  -2  12  -5  158.44  306.33
   2 -11  -9   -3.10  161.15
   2 -11  -8  425.34  271.65
   2 -11  -7   33.96  113.49
   2 -11  -7   58.50  228.22
   2 -11  -6  822.45  198.69
   2 -11  -6  745.60  303.40
   2 -11  -5   65.35  159.44
   2 -11  -5  113.88  276.90
   2 -11  -4   99.24  164.48
   2 -11  -3   46.18  173.88
  -2  11   3   79.06  162.66
   2 -11  -2 5460.25  774.62
  -2  11   2 4633.97  657.72
   2 -11  -1  146.11  265.40
  -2  11   1   83.66  229.14
   2 -11   0 1989.85  405.09
  -2  11   0 1772.89  349.29
   2 -11   1  570.89  342.81
  -2  11  -1  304.40  511.45
   2 -11   2  816.10  269.03
  -2  11  -2  561.13  724.65
   2 -11   3 2796.28  384.67
  -2  11  -3 2291.60 1058.49
   2 -11   4 2299.28  332.67
  -2  11  -4 1868.35  816.69
   2 -11   5  283.75  223.02
  -2  11  -5  204.92  375.16
   2 -11   6   26.20  183.28
  -2  11  -6   35.05  142.79
   2 -11   7   21.66  112.97
  -2  11  -7    4.64  169.64
   2 -11   8  357.46  271.77
  -2  11  -8  161.38  426.38
   2 -10 -11   80.08  232.35
  -2  10  11    2.61  101.92
   2 -10 -10  469.86  251.90
  -2  10  10  451.08  228.02
  -2  10   9   70.15  133.65
   2 -10  -8   23.56  129.54
  -2  10   8  -13.07   91.20
   2 -10  -7  969.15  192.47
   2 -10  -7 1019.87  280.57
  -2  10   7  962.70  217.08
   2 -10  -6  533.59  191.17
   2 -10  -6  437.44  266.23
  -2  10   6  430.46  194.02
   2 -10  -5   26.64  119.90
   2 -10  -5   32.33  239.45
  -2  10   5   26.85  106.60
   2 -10  -4   83.61  212.53
   2 -10  -3  717.10  291.84
  -2  10   3  436.10  641.32
   2 -10  -2 6493.15  782.18
  -2  10   2 5443.85  668.91
   2 -10  -1  125.92  223.55
  -2  10   1  100.61  258.48
   2 -10   0  353.91  297.30
  -2  10   0  339.37  498.92
   2 -10   113372.06  577.67
  -2  10  -112361.78 1781.75
   2 -10   2 1273.22  386.12
  -2  10  -2 1063.53  521.62
   2 -10   3  112.78  222.53
  -2  10  -3  119.87  279.67
   2 -10   4 1001.04  311.13
  -2  10  -4  837.46  791.11
   2 -10   5 3438.07  511.98
  -2  10  -5 2845.93  643.27
   2 -10   6   45.21  164.71
  -2  10  -6   57.44  131.01
   2 -10   7  197.25  245.83
  -2  10  -7  132.31  180.80
   2 -10   8   63.82  185.80
  -2  10  -8   27.07  163.28
   2 -10   9  161.32  207.43
  -2  10  -9   56.98  144.94
   2 -10  10   64.07  138.26
  -2  10 -10   49.83  178.69
   2  -9 -12 1329.48  296.38
  -2   9  12 1185.72  300.62
   2  -9 -11   -6.52  131.52
  -2   9  11    2.92  109.81
   2  -9 -10 1594.64  290.54
  -2   9  10 1531.97  397.14
   2  -9  -9  335.53  250.78
  -2   9   9  130.75  161.09
   2  -9  -8   -9.97   66.41
   2  -9  -8   53.58  223.13
  -2   9   8   41.98  156.99
   2  -9  -7  132.45  140.52
   2  -9  -7  143.93  220.37
  -2   9   7  114.65  183.07
   2  -9  -6 1329.01  214.83
   2  -9  -6 1433.27  388.87
  -2   9   6 1134.00  251.86
   2  -9  -5   16.15   82.63
   2  -9  -5   24.78  160.31
  -2   9   5   19.76  112.47
   2  -9  -4 4931.02  423.97
   2  -9  -4 4515.63  417.27
  -2   9   4 4385.96  362.48
   2  -9  -3 3075.33  355.47
  -2   9   3 2674.67  326.24
  -2   9   3 2770.51  242.38
   2  -9  -2   52.79  200.17
  -2   9   2   32.95  153.21
  -2   9   2   81.13   92.55
   2  -9  -1 7401.10  533.92
  -2   9   1 6479.12 1153.66
   2  -9   0  188.57  210.36
  -2   9   0  233.14  331.02
   2  -9   1 2748.99  327.74
  -2   9  -1 2615.70  479.02
   2  -9   2 1053.09  315.89
  -2   9  -2  909.28  335.21
   2  -9   3 8424.15  627.18
  -2   9  -3 8032.55  642.17
   2  -9   4 3506.14  419.28
  -2   9  -4 3170.96  498.42
   2  -9   5   42.65  184.22
  -2   9  -5   17.47  105.94
   2  -9   6   67.14  165.47
  -2   9  -6   24.40  142.50
   2  -9   7   41.90  156.10
  -2   9  -7  109.87  208.02
   2  -9   8  821.15  284.05
  -2   9  -8  658.46  530.02
   2  -9   9   77.61  184.55
  -2   9  -9   94.11  181.76
   2  -9  10 3626.02  359.50
  -2   9 -10 3186.66  367.85
   2  -9  11  319.83  276.05
  -2   9 -11   55.63  136.46
   2  -8 -13  695.02  268.41
  -2   8  13  561.70  292.06
   2  -8 -12 2817.14  365.20
  -2   8  12 2355.45  385.78
   2  -8 -11 2100.41  339.70
  -2   8  11 1831.87  366.90
   2  -8 -10  562.03  252.83
  -2   8  10  438.86  209.78
   2  -8  -9  637.92  287.92
  -2   8   9  556.29  194.73
   2  -8  -8   -3.82   72.05
   2  -8  -8   45.65  186.35
  -2   8   8   27.18  142.31
   2  -8  -7   48.41  110.95
   2  -8  -7   46.94  230.06
  -2   8   7  102.82  180.17
   2  -8  -6 2314.00  224.06
   2  -8  -6 2350.76  294.76
  -2   8   6 2075.98  248.26
   2  -8  -516172.50  930.76
   2  -8  -515414.09  929.23
  -2   8   513899.36  787.37
   2  -8  -4  858.91  174.36
   2  -8  -4  831.80  246.86
  -2   8   4  719.25  174.06
   2  -8  -3 1548.58  240.13
  -2   8   3 1488.84  163.69
   2  -8  -2  753.38  226.57
  -2   8   2  634.64  244.62
  -2   8   2  684.11  139.66
   2  -8  -1 9686.16  505.57
  -2   8   1 8886.73  539.37
  -2   8   1 8326.84  284.65
   2  -8   010820.04  533.14
  -2   8   010228.02  620.88
   2  -8   2 1347.46  257.83
  -2   8  -2 1342.02  601.71
   2  -8   3 1170.54  291.03
  -2   8  -3 1131.89  253.84
   2  -8   4   16.16  133.69
  -2   8  -4   17.18  135.67
   2  -8   5 3534.40  341.93
  -2   8  -5 3282.41  522.57
   2  -8   6  697.77  239.66
  -2   8  -6  626.87  648.30
   2  -8   7  506.41  222.31
  -2   8  -7  419.12  481.61
   2  -8   8   11.80  111.76
  -2   8  -8  -16.94  194.93
   2  -8   9  500.27  256.69
  -2   8  -9  298.93  445.34
   2  -8  10   63.71  153.64
  -2   8 -10  -10.21  162.06
   2  -8  11  461.30  264.18
  -2   8 -11  497.62  298.18
   2  -8  12   82.06  191.04
   2  -8  13   22.97  121.59
   2  -8  13  111.99  210.25
   2  -7 -14   20.08  169.72
  -2   7  14   25.03  133.53
   2  -7 -13   69.41  208.81
   2  -7 -12  162.86  274.93
  -2   7  12  106.43  248.72
   2  -7 -11 1050.01  324.39
  -2   7  11  867.14  314.67
   2  -7 -10  417.99  277.55
  -2   7  10  406.66  262.77
   2  -7  -9 2389.16  203.25
   2  -7  -9 2383.22  356.05
  -2   7   9 2124.86  345.50
   2  -7  -8   14.05   64.81
   2  -7  -8   20.43  167.21
  -2   7   8   81.47  214.76
   2  -7  -7 1256.63  153.52
   2  -7  -7 1291.20  262.06
  -2   7   7 1111.43  257.65
   2  -7  -6   11.78  123.07
   2  -7  -6   78.97  180.01
  -2   7   6    5.60  104.32
   2  -7  -5 4532.14  273.81
   2  -7  -5 3654.97  265.81
  -2   7   5 4401.89  353.75
   2  -7  -4  225.19  146.92
   2  -7  -4  145.49  153.27
  -2   7   4  204.87  172.46
   2  -7  -3   94.84  145.60
   2  -7  -3   92.40  174.57
  -2   7   3   65.46  121.08
   2  -7  -2  704.23  178.60
  -2   7   2  751.89   92.08
  -2   7   2  816.67  119.44
   2  -7  -1 2308.14  284.65
  -2   7   1 2144.20  306.31
  -2   7   1 2514.66  194.41
  -2   7   1 2345.96  208.78
   2  -7   0 7044.24  588.08
  -2   7   0 6573.91  907.35
  -2   7   0 6682.19  425.06
   2  -7   1  821.51  252.63
  -2   7  -1  679.21  375.14
   2  -7   2 2316.28  306.85
  -2   7  -2 1942.92  296.02
   2  -7   3  143.47  204.00
  -2   7  -3   13.90   78.07
   2  -7   4 1784.49  266.02
  -2   7  -4 1165.01  249.91
   2  -7   5 4460.43  308.44
  -2   7  -5 3277.30  391.38
   2  -7   6 4531.32  382.41
  -2   7  -6 3889.22  410.02
   2  -7   7 5322.38  423.15
  -2   7  -7 4953.27  468.16
   2  -7   8  174.96  193.69
  -2   7  -8   65.41  200.97
   2  -7   9  265.44  187.45
  -2   7  -9  252.57  399.82
   2  -7  10  318.25  178.74
  -2   7 -10  254.00  317.38
   2  -7  11 2941.74  433.48
  -2   7 -11 2307.86  410.84
   2  -7  12  969.54  310.71
   2  -7  13 2047.64  238.79
   2  -7  13 2385.72  374.23
   2  -7  14  123.36  119.58
   2  -7  14   21.84   97.11
   2  -6 -15   85.15  198.40
  -2   6  15   84.54  225.83
   2  -6 -14  287.24  227.15
  -2   6  14  282.57  276.00
   2  -6 -13   48.68  140.39
  -2   6  13  119.67  223.62
   2  -6 -12  116.78  263.89
  -2   6  12  100.87  239.91
   2  -6 -11  140.21  227.86
  -2   6  11  109.46  205.11
   2  -6 -10   34.08  168.87
  -2   6  10   87.91  248.51
   2  -6  -9   13.60   57.62
   2  -6  -9   54.94  163.55
  -2   6   9   10.53  134.12
   2  -6  -8   -7.89   52.22
   2  -6  -8   37.44  198.97
  -2   6   8   13.21  114.55
   2  -6  -7 1754.39  152.83
   2  -6  -7 1114.68  231.45
  -2   6   7 1572.38  249.56
   2  -6  -610424.79  423.64
   2  -6  -6 9090.52  450.56
  -2   6   6 9643.25  481.69
   2  -6  -5 1383.59  187.20
   2  -6  -5 1119.11  177.32
  -2   6   5 1337.10  261.14
   2  -6  -4  895.79  165.98
   2  -6  -4  794.66  185.46
  -2   6   4  831.58  220.45
   2  -6  -3  388.52  152.40
   2  -6  -3  274.91  133.81
  -2   6   3  282.94  204.70
  -2   6   3  296.14  119.76
   2  -6  -2 8315.81  428.72
   2  -6  -2 7484.02  397.33
  -2   6   2 9218.25  371.70
  -2   6   2 8459.02  383.21
   2  -6  -1 1850.48  189.09
   2  -6  -1 2086.07  256.24
  -2   6   1 2206.53  143.05
  -2   6   1 2114.36  194.54
   2  -6   0  707.82  194.89
  -2   6   0  736.13  207.25
  -2   6   0  828.22   69.95
  -2   6   0  831.41   98.24
   2  -6   1 6279.80  355.76
  -2   6  -1 6117.31  406.61
   2  -6   2   63.45  160.48
  -2   6  -2   30.48   95.06
   2  -6   3  879.11  230.67
  -2   6  -3  605.21  155.91
   2  -6   4 4482.63  392.79
  -2   6  -4 3632.62  539.55
   2  -6   5  225.06  149.06
  -2   6  -5  255.04  337.69
   2  -6   6 2611.95  251.58
  -2   6  -6 2246.27  456.18
   2  -6   7 6140.94  407.48
  -2   6  -7 5030.42  576.82
   2  -6   8 2452.56  334.47
  -2   6  -8 1966.84  722.30
   2  -6   9 2911.85  343.31
  -2   6  -9 2575.58  343.05
   2  -6  10  601.64  229.62
  -2   6 -10  460.26  252.00
   2  -6  11    3.60  101.65
   2  -6  11   -0.52   90.73
   2  -6  12  266.28  170.59
   2  -6  12  254.75  194.18
   2  -6  13  976.46  216.36
   2  -6  13 1050.42  301.40
   2  -6  14  113.85  198.72
   2  -6  14  127.09  148.09
   2  -6  15   89.75  122.11
   2  -5 -15 2499.37  370.23
  -2   5  15 2322.18  468.24
   2  -5 -14  798.58  266.61
  -2   5  14  804.36  351.01
   2  -5 -13  334.52  277.39
  -2   5  13  335.71  329.13
   2  -5 -12  393.17  287.79
  -2   5  12  379.95  321.29
   2  -5 -11 1226.76  329.40
  -2   5  11 1103.29  347.25
   2  -5 -10   13.32   44.50
   2  -5 -10   73.69  213.80
  -2   5  10  -13.62  148.67
   2  -5  -9 1243.99  105.72
   2  -5  -9 1307.17  265.63
  -2   5   9 1284.53  318.27
   2  -5  -8 3699.35  188.34
   2  -5  -8 4856.46  207.21
   2  -5  -8 3926.81  331.76
  -2   5   8 4545.43  428.53
   2  -5  -7 3090.10  173.58
   2  -5  -7 2400.00  233.78
  -2   5   7 2527.87  330.81
   2  -5  -611464.24  762.40
   2  -5  -6 9762.74  699.17
  -2   5   6 9992.78  736.04
   2  -5  -5  341.12  132.42
   2  -5  -5  384.50  185.06
  -2   5   5  376.66  176.31
   2  -5  -4 6710.06  338.79
   2  -5  -4 5655.51  332.43
  -2   5   4 5780.39  362.07
   2  -5  -3 5842.49  243.30
   2  -5  -3 5928.29  280.97
  -2   5   3 6190.87  318.84
   2  -5  -2  304.09  137.87
   2  -5  -2  281.14  155.49
  -2   5   2  346.84  161.63
  -2   5   2  324.03  121.20
   2  -5  -1  537.46  146.03
   2  -5  -1  566.62  189.26
  -2   5   1  627.55   93.20
  -2   5   1  541.16  115.77
   2  -5   0  298.41  158.03
   2  -5   0  292.05  138.80
  -2   5   0  317.49  111.25
  -2   5   0  322.91  110.33
   2  -5   1 2520.87  195.78
   2  -5   1 2301.37  193.54
  -2   5  -1 2620.29   76.00
  -2   5  -1 2540.37   92.83
   2  -5   2 6483.22  282.93
   2  -5   3  233.00  163.53
  -2   5  -3  118.42  164.11
   2  -5   4  543.14  142.47
  -2   5  -4  459.66  183.73
   2  -5   5 7471.13  380.18
  -2   5  -5 6040.92  564.59
   2  -5   612631.77  863.94
  -2   5  -610672.31  764.46
   2  -5   7 3786.72  255.05
   2  -5   7 4288.00  417.99
  -2   5  -7 3065.34  355.88
   2  -5   814381.55  453.08
   2  -5   813447.36  210.35
   2  -5   9  267.79  207.72
   2  -5   9  189.70  101.40
   2  -5  10 2349.09  267.13
   2  -5  10 2334.21  278.97
   2  -5  10 2014.34  160.08
   2  -5  11  781.20  225.84
   2  -5  11  713.78  192.74
   2  -5  11  585.82  146.66
   2  -5  12 1143.64  231.16
   2  -5  12 1013.48  223.83
   2  -5  13   84.02  125.35
   2  -5  13   73.59  194.45
   2  -5  14  206.33  194.74
   2  -5  14  154.70  172.99
   2  -5  15 1275.24  182.03
   2  -4 -16   44.04  105.52
  -2   4  16   21.59  164.56
   2  -4 -15  713.35  235.81
  -2   4  15  628.93  299.99
   2  -4 -14   79.48  155.07
  -2   4  14   19.38  150.79
   2  -4 -13  -13.09  169.06
  -2   4  13   69.21  293.42
   2  -4 -12  178.85  290.40
  -2   4  12  190.59  350.99
   2  -4 -11   71.26  228.02
  -2   4  11  210.31  371.26
   2  -4 -10 2573.35  163.84
   2  -4 -10 2583.73  342.21
  -2   4  10 2581.04  412.24
   2  -4  -9  197.78  131.39
   2  -4  -9  321.43   84.69
   2  -4  -9  193.06  204.88
  -2   4   9  199.91  221.92
   2  -4  -8  143.25   89.96
   2  -4  -8  222.70   80.53
   2  -4  -8  140.25  156.07
  -2   4   8  227.41  231.99
   2  -4  -7   63.30   56.16
   2  -4  -7   96.79   80.12
   2  -4  -7   46.75  147.16
  -2   4   7   67.08  162.40
   2  -4  -6 4277.55  247.66
   2  -4  -6 5204.41  265.58
   2  -4  -6 4007.94  284.88
  -2   4   6 4099.33  371.49
   2  -4  -511104.06  463.83
   2  -4  -5 9784.73  450.48
  -2   4   5 9589.05  497.43
   2  -4  -319370.92  532.43
   2  -4  -2 3055.84  193.88
   2  -4  -2 2941.51  222.13
  -2   4   2 3188.04  225.85
  -2   4   2 3375.04  273.29
   2  -4  -1 2628.33  195.79
   2  -4  -1 2242.88  202.14
  -2   4   1 2651.24  162.59
  -2   4   1 2914.06  207.19
   2  -4   0 7896.88  392.58
   2  -4   0 7151.98  371.71
  -2   4   0 8424.54  361.34
  -2   4   0 8180.80  377.20
   2  -4   1 7316.13  387.98
   2  -4   1 7043.68  354.08
  -2   4  -1 8078.79  353.55
  -2   4  -1 7718.40  338.88
   2  -4   213275.72  596.47
   2  -4   214163.25  620.99
  -2   4  -217992.28  710.43
   2  -4   319681.98  843.20
   2  -4   321936.85 1447.29
   2  -4   4  580.56  154.69
   2  -4   4  633.74  141.20
   2  -4   5 4005.12  220.49
   2  -4   5 3967.26  210.09
   2  -4   5 3947.71  111.50
   2  -4   6 3292.01  234.32
   2  -4   6 3588.28  257.88
   2  -4   6 3351.08  162.35
   2  -4   6 3495.32  173.45
   2  -4   7 2677.56  229.10
   2  -4   7 3300.70  322.42
   2  -4   7 2938.37  224.47
   2  -4   7 2931.85  232.27
   2  -4   8  397.35  188.79
   2  -4   8  382.62  172.67
   2  -4   8  335.31   84.24
   2  -4   8  356.75  110.73
   2  -4   9 1435.96  203.69
   2  -4   9 1251.64  207.07
   2  -4   9 1129.99  118.30
   2  -4   9 1256.83  171.99
   2  -4  10 1058.00  214.09
   2  -4  10 1155.48  194.63
   2  -4  10  949.49  181.55
   2  -4  11 3979.15  326.97
   2  -4  11 3748.20  280.13
   2  -4  11 3498.13  302.89
   2  -4  12  570.03  176.56
   2  -4  12  628.40  226.32
   2  -4  12  487.51  170.11
   2  -4  13  111.49  108.32
   2  -4  13  230.87  204.20
   2  -4  13  160.03  136.23
   2  -4  14   54.53  142.63
   2  -4  14  253.69  199.02
   2  -4  15   25.62   77.00
   2  -4  15   72.07  149.54
   2  -3 -16 1725.97  863.44
  -2   3  16 1453.67  440.96
   2  -3 -15  405.92  449.11
  -2   3  15  371.99  288.30
   2  -3 -14   53.10  156.63
  -2   3  14   47.01  140.42
   2  -3 -13 2867.83  475.57
  -2   3  13 2564.47  517.50
   2  -3 -12 4238.14  462.87
  -2   3  12 3956.03  523.44
   2  -3 -1110340.77  718.72
  -2   3  11 9538.46  744.71
   2  -3 -10   14.11   35.29
   2  -3 -10   17.43  139.42
  -2   3  10    8.51  166.33
   2  -3  -9   92.02   70.18
   2  -3  -9  157.19   65.81
   2  -3  -9   72.13  147.23
  -2   3   9   86.60  201.33
   2  -3  -8  139.91  122.77
   2  -3  -8  199.87   91.62
   2  -3  -8  169.19  169.87
  -2   3   8   65.00  172.41
   2  -3  -7 4184.99  237.42
   2  -3  -7 4928.47  245.52
   2  -3  -7 4219.32  280.73
  -2   3   7 4182.80  374.15
   2  -3  -6 3894.38  216.25
   2  -3  -6 4718.92  235.96
   2  -3  -6 4529.70  291.47
  -2   3   6 3656.74  308.23
  -2   3   537839.02  531.38
   2  -3  -458295.98 3753.60
   2  -3  -454024.56 3491.91
  -2   3   458101.67 3757.13
   2  -3  -3 1916.48  174.33
   2  -3  -3 1960.16  170.97
   2  -3  -3 2039.45  202.07
  -2   3   3 1775.55  228.29
   2  -3  -2  149.74  178.35
   2  -3  -2  110.39  133.11
   2  -3  -2  129.16  131.06
   2  -3  -2  134.23   78.97
  -2   3   2  178.10  160.02
   2  -3  -1 1115.25  149.40
   2  -3  -1 1056.72  164.64
   2  -3  -1 1111.86  113.28
  -2   3   1 1145.38  174.25
  -2   3   1 1193.13  119.30
   2  -3   0   11.21   78.81
   2  -3   0    5.26   73.16
   2  -3   0   32.20   77.79
  -2   3   0   37.60   83.23
  -2   3   0    8.94   53.78
   2  -3   1 7408.74  290.34
   2  -3   1 7296.99  277.09
   2  -3   1 8806.29  284.64
  -2   3  -1 8016.15  284.14
  -2   3  -1 8508.60  294.58
   2  -3   2 6405.49  260.18
   2  -3   2 7279.82  249.21
  -2   3  -2 6939.67  237.86
  -2   3  -2 6836.47  249.91
   2  -3   3 5530.31  303.80
   2  -3   3 5856.88  299.58
   2  -3   3 5338.70  239.79
  -2   3  -3 5954.16  270.50
  -2   3  -3 5911.35  281.63
   2  -3   4 1634.63  171.08
   2  -3   4 1833.19  172.44
   2  -3   4 1658.92  123.17
  -2   3  -4 1809.35  155.56
  -2   3  -4 1831.90  144.46
   2  -3   5 2301.37  167.62
   2  -3   5 2224.95  160.53
   2  -3   5 2107.98  117.31
  -2   3  -5 2398.93  168.46
  -2   3  -5 2330.45  137.07
   2  -3   6  955.00  176.01
   2  -3   6  968.68  173.79
   2  -3   6 1056.04  170.02
   2  -3   6 1053.35  124.62
  -2   3  -6 1035.76  204.19
   2  -3   710869.47  481.07
   2  -3   712647.71  498.51
   2  -3   711362.12  487.78
   2  -3   712431.80  475.67
  -2   3  -712489.88  613.01
   2  -3   810972.85  756.23
   2  -3   810190.09  675.48
   2  -3   810475.34  671.12
  -2   3  -811220.07  817.52
   2  -3   9 6112.07  473.00
   2  -3   9 5593.63  409.78
  -2   3  -9 6505.50  592.73
   2  -3  10 9784.50  427.61
   2  -3  1010025.88  382.55
   2  -3  1114958.84  845.06
   2  -3  1116273.65  880.84
   2  -3  1114318.98  796.46
   2  -3  12 7060.67  393.82
   2  -3  12 7923.42  461.69
   2  -3  12 6935.26  431.46
   2  -3  13   -6.42   64.42
   2  -3  13   17.60   89.43
   2  -3  13  -23.79   78.62
   2  -3  14    8.87   75.85
   2  -3  14   29.62  116.27
   2  -3  14  -10.14   83.42
   2  -3  15  267.79  187.62
   2  -3  16  932.95  183.08
   2  -2 -16 2877.86  503.91
  -2   2  16 2886.45  567.67
   2  -2 -15  555.62  549.89
  -2   2  15  599.35  397.35
   2  -2 -14   37.40  139.09
  -2   2  14  -16.66  167.70
   2  -2 -13 1777.36  384.13
  -2   2  13 1570.14  385.44
   2  -2 -12   97.27  236.32
  -2   2  12   71.13  294.55
   2  -2 -11  859.50   93.84
   2  -2 -11 1064.98  297.28
  -2   2  11 1039.34  355.02
   2  -2 -10 1367.27  122.29
   2  -2 -10 1005.38  243.36
  -2   2  10  957.98  279.61
   2  -2  -9 1128.35  121.14
   2  -2  -9  851.39  209.49
  -2   2   9 1081.75   85.38
  -2   2   9  949.52  275.33
   2  -2  -8  111.21   79.09
   2  -2  -8   40.78  110.92
  -2   2   8   51.89   42.33
  -2   2   8   43.50  151.25
   2  -2  -7  873.06  130.67
   2  -2  -7  720.49  170.45
  -2   2   7  780.64   74.20
  -2   2   7  700.84  215.89
   2  -2  -6  621.45  118.34
   2  -2  -6  532.41  154.39
  -2   2   6  597.11   84.85
  -2   2   6  520.52  212.74
   2  -2  -5 6106.71  302.57
   2  -2  -5 5423.20  323.81
  -2   2   5 6139.19  285.70
  -2   2   5 5350.27  369.06
   2  -2  -4   -5.31   66.03
   2  -2  -4   -4.67   89.12
  -2   2   4   -5.57   48.51
  -2   2   4  -12.07   94.47
   2  -2  -3 1210.03  120.70
   2  -2  -3 1397.75  156.89
   2  -2  -3 1414.22  133.91
  -2   2   3 1485.36  105.13
  -2   2   3 1300.74  185.56
   2  -2  -212608.70  426.54
   2  -2  -215739.02  497.25
   2  -2  -213013.05  451.40
  -2   2   214017.11  437.32
  -2   2   213178.38  468.63
  -2   2   214654.59  449.12
   2  -2  -1 8544.13  334.61
   2  -2  -1 9810.74  364.42
   2  -2  -1 7931.73  319.55
  -2   2   1 9784.92  329.20
  -2   2   1 8313.20  355.54
  -2   2   1 9471.41  328.81
   2  -2   0   10.61   84.79
   2  -2   0  142.31  104.61
   2  -2   0    0.68   68.62
  -2   2   0   72.47  102.06
  -2   2   0  156.24  134.81
  -2   2   0   42.71  126.23
   2  -2   112372.52  423.61
   2  -2   115962.71  479.11
   2  -2   112616.58  399.88
  -2   2  -114386.85  428.49
  -2   2  -113784.67  437.49
  -2   2  -114576.11  464.51
   2  -2   215987.69  534.98
   2  -2   217724.24  539.68
   2  -2   217973.89  522.82
  -2   2  -218701.36  561.05
  -2   2  -218111.57  525.71
   2  -2   3 7247.61  307.56
   2  -2   3 8294.31  300.05
   2  -2   3 8224.75  276.19
  -2   2  -3 8858.00  319.96
  -2   2  -3 8404.44  272.42
   2  -2   4  481.13  118.38
   2  -2   4  527.42  115.75
   2  -2   4  460.97   78.47
  -2   2  -4  513.44  110.04
  -2   2  -4  519.02   77.46
   2  -2   5  329.22  143.89
   2  -2   5  376.50  100.41
   2  -2   5  392.73  105.21
   2  -2   5  318.76   61.76
  -2   2  -5  414.98  161.38
   2  -2   6 1822.66  180.72
   2  -2   6 1879.06  112.15
   2  -2   6 1976.71  146.07
   2  -2   6 1813.41  125.87
  -2   2  -6 2119.97  197.21
   2  -2   7 1789.16  166.18
   2  -2   7 1726.21  129.56
   2  -2   7 1858.80  135.33
   2  -2   7 1717.56  124.65
  -2   2  -7 1895.63  175.24
   2  -2   8 2852.92  214.86
   2  -2   8 2733.20  202.99
   2  -2   8 2925.14  177.51
  -2   2  -8 2877.79  279.74
   2  -2   9   31.15   89.17
   2  -2   9    6.14   34.44
   2  -2   9   32.19   86.76
  -2   2  -9   -5.88   84.00
   2  -2  10 2578.11  221.79
   2  -2  10 2562.27  195.38
  -2   2 -10 2434.87  257.63
   2  -2  11  972.71  150.45
   2  -2  11 1013.31  167.04
  -2   2 -11 1113.69  494.47
   2  -2  12 1248.57  127.17
   2  -2  12 1290.13  206.00
  -2   2 -12 1480.50  238.26
   2  -2  13   45.41  131.11
   2  -2  13   45.55  103.50
   2  -2  14 5950.00  631.39
   2  -2  14 5613.32  610.81
   2  -2  14 5395.62  604.46
   2  -2  15 1252.95  297.21
   2  -2  16  531.02  222.37
   2  -2  17   86.72  158.58
   2  -1 -16  -38.24  124.44
  -2   1  16    8.55  153.30
   2  -1 -15 4452.74  770.03
  -2   1  15 4397.79  662.07
   2  -1 -14   13.66  172.72
  -2   1  14   71.58  272.32
   2  -1 -13  464.18  488.05
  -2   1  13  400.32  351.38
   2  -1 -12 1221.28  611.76
  -2   1  12 1149.72  384.03
   2  -1 -11   89.77   75.27
   2  -1 -11  162.78  249.23
  -2   1  11   96.19  220.70
   2  -1 -10 3077.45  173.67
   2  -1 -10 2566.29  581.49
  -2   1  10 2600.55  390.89
   2  -1  -9 1859.42  188.44
   2  -1  -9 1422.24  215.48
  -2   1   9 1740.44  147.48
  -2   1   9 1393.25  334.28
   2  -1  -8 8424.75  365.17
   2  -1  -8 6688.54  398.48
  -2   1   8 8329.63  333.49
  -2   1   8 7523.20  455.42
   2  -1  -7  421.18  117.16
   2  -1  -7  412.32  170.09
  -2   1   7  441.50   75.57
  -2   1   7  513.36  254.39
   2  -1  -610071.20  299.11
   2  -1  -6 9214.92  351.10
  -2   1   6 9921.35  257.43
  -2   1   6 8783.21  406.05
   2  -1  -5 4272.06  244.07
   2  -1  -5 3766.65  267.33
  -2   1   5 4323.15  217.95
  -2   1   5 3768.29  329.01
   2  -1  -4 1679.69  138.96
   2  -1  -4 1657.71  168.05
  -2   1   4 2004.79  131.82
  -2   1   4 1362.14  235.13
   2  -1  -3  162.67  104.82
   2  -1  -3  222.32  112.02
   2  -1  -3  128.44  136.40
  -2   1   3  232.69   97.08
  -2   1   3  258.47  188.46
  -2   1   3  233.18   79.49
   2  -1  -2   75.64  100.99
   2  -1  -2  110.48  126.43
   2  -1  -2   38.15   85.57
  -2   1   2  156.28   81.30
  -2   1   2  133.47  165.30
  -2   1   2  124.77   78.31
   2  -1  -1 7672.89  262.25
   2  -1  -1 6912.18  268.34
  -2   1   1 8935.39  271.39
  -2   1   1 8338.77  240.81
  -2   1   1 7743.80  308.66
   2  -1   018881.21  506.62
   2  -1   020602.12  527.43
  -2   1   021797.75  551.28
  -2   1   021706.70  526.38
  -2   1   020180.95  545.53
   2  -1   1 7297.84  266.94
   2  -1   1 8675.33  286.19
   2  -1   1 8229.74  276.02
  -2   1  -1 8384.03  238.26
  -2   1  -1 7421.28  278.30
  -2   1  -1 8074.41  276.77
   2  -1   214139.50  390.22
   2  -1   213511.85  353.71
  -2   1  -214222.18  353.30
  -2   1  -212511.31  364.63
  -2   1  -214143.08  387.11
   2  -1   3   88.72  127.03
   2  -1   3   85.23   86.36
   2  -1   3   69.50   84.19
  -2   1  -3   81.76   84.13
  -2   1  -3   77.10  129.61
  -2   1  -3   44.70   96.67
   2  -1   4 9498.28  354.76
   2  -1   410502.88  313.15
   2  -1   410676.19  346.19
  -2   1  -411234.36  384.80
  -2   1  -410775.68  317.14
   2  -1   5 3417.50  221.21
   2  -1   5 3572.20  203.98
   2  -1   5 3377.12  156.60
   2  -1   5 3371.95  198.84
  -2   1  -5 3368.90  220.66
   2  -1   6 5880.92  298.69
   2  -1   6 7317.10  324.13
   2  -1   6 6621.04  285.76
   2  -1   6 7219.07  334.78
  -2   1  -6 6964.09  434.28
   2  -1   7 5762.58  226.97
   2  -1   7 6031.95  172.19
   2  -1   7 5875.70  165.47
  -2   1  -7 5970.63  339.53
   2  -1   8 2126.15  178.99
   2  -1   8 2153.84  128.58
   2  -1   8 2095.85  145.87
  -2   1  -8 2048.83  388.82
   2  -1   9 2619.33  197.01
   2  -1   9 2349.52  139.38
   2  -1   9 2392.78  161.21
  -2   1  -9 2430.16  326.69
   2  -1  10 7110.19  496.81
   2  -1  10 6621.39  432.31
   2  -1  10 7113.89  483.33
  -2   1 -10 7032.88  615.75
   2  -1  11 5910.40  258.30
   2  -1  11 5834.44  264.32
  -2   1 -11 5496.91  392.38
   2  -1  12 4688.95  301.53
   2  -1  12 4908.21  354.82
  -2   1 -12 4559.22  439.82
   2  -1  13 4947.20  352.20
  -2   1 -13 4584.76  587.75
   2  -1  14  416.89  116.21
   2  -1  16    1.93   86.53
   2  -1  17  158.23  216.63
   2   0 -16  162.33  227.80
  -2   0  16   69.14  176.86
   2   0 -15 1227.89  706.62
  -2   0  15 1362.26  476.52
   2   0 -14   10.25  127.58
  -2   0  14   12.59  209.33
   2   0 -13  135.03  225.54
  -2   0  13  110.45  264.90
   2   0 -12   -3.15   37.90
   2   0 -12   42.99  151.09
  -2   0  12   90.86  276.23
   2   0 -11  430.16  119.19
   2   0 -11  655.27  675.68
  -2   0  11  563.82  276.50
   2   0 -10 1909.37  155.81
   2   0 -10 1684.27  637.46
  -2   0  10 1881.37  318.48
   2   0  -9 7331.71  504.36
   2   0  -9 6142.77  635.60
  -2   0   9 7307.16  621.59
   2   0  -8 9884.80  434.99
   2   0  -8 8656.03  503.34
  -2   0   8 8982.15  356.56
  -2   0   8 8747.97  490.44
   2   0  -7  346.75  115.47
   2   0  -7  300.62  320.73
  -2   0   7  284.99   67.89
  -2   0   7  318.91  198.55
   2   0  -6 2609.25  191.32
   2   0  -6 2274.94  207.33
  -2   0   6 2551.38  129.34
  -2   0   6 2271.38  271.49
   2   0  -5  816.67  132.04
   2   0  -5  704.23  153.09
  -2   0   5  808.98   90.45
  -2   0   5  668.02  263.95
   2   0  -4  402.68  134.27
   2   0  -4  366.44  148.03
  -2   0   4  483.18   86.23
  -2   0   4  459.80  212.08
   2   0  -3 1439.48  147.92
   2   0  -3 1326.04  166.89
  -2   0   3 1514.63  108.26
  -2   0   3 1511.96  120.54
  -2   0   3 1402.33  237.17
   2   0  -2 3486.71  180.05
   2   0  -2 4621.79  250.19
   2   0  -2 3699.15  208.39
  -2   0   2 4568.02  198.80
  -2   0   2 3541.60  260.88
  -2   0   2 4910.24  192.92
   2   0  -1  533.42  109.82
   2   0  -1  601.48  135.54
   2   0  -1  428.22  120.92
  -2   0   1  666.49   99.26
  -2   0   1  464.34  152.64
  -2   0   1  672.12   98.03
   2   0   0  111.16  103.30
   2   0   0   92.75  112.36
   2   0   0  132.92  140.30
  -2   0   0  130.94   63.94
  -2   0   0  110.77  122.93
  -2   0   0  148.96   95.45
   2   0   1   24.08   78.68
   2   0   1    5.92   84.16
   2   0   1   45.47   90.37
  -2   0  -1   35.19   71.32
  -2   0  -1   59.97  146.70
  -2   0  -1   53.75  108.42
   2   0   2 7962.40  278.14
   2   0   2 9491.36  312.45
   2   0   2 8866.01  241.31
  -2   0  -2 8453.81  216.76
  -2   0  -2 7892.01  278.83
  -2   0  -2 9166.59  277.19
   2   0   3 8449.52  299.95
   2   0   3 9549.04  306.44
   2   0   3 8568.37  208.42
  -2   0  -3 9078.87  219.36
  -2   0  -3 8663.41  322.47
  -2   0  -3 9310.70  281.37
   2   0   411033.52  382.85
   2   0   413117.86  423.17
  -2   0  -411365.87  385.96
  -2   0  -413046.21  411.46
   2   0   5   -8.24   83.24
   2   0   5   16.52   90.07
  -2   0  -5   -2.78   73.36
  -2   0  -5   -3.21   57.73
   2   0   6 4651.23  271.72
   2   0   6 4455.64  187.14
   2   0   6 4855.58  204.68
  -2   0  -6 5013.60  251.22
  -2   0  -6 3819.55  259.19
   2   0   7 3239.36  195.89
   2   0   7 2920.28   98.05
   2   0   7 2879.38  103.19
  -2   0  -7 2348.01  248.67
   2   0   8 3785.07  204.71
   2   0   8 3491.54  126.53
  -2   0  -8 3331.41  397.20
   2   0   9 1986.11  162.08
   2   0   9 1891.12  115.21
  -2   0  -9 1794.86  207.38
  -2   0  -9 1931.43  256.26
   2   0  10 6003.71  415.98
   2   0  10 5503.38  365.64
  -2   0 -10 5344.20  384.65
  -2   0 -10 5379.92  502.94
   2   0  11  186.98  144.61
   2   0  11  153.82   57.02
  -2   0 -11  184.63  168.58
  -2   0 -11  269.83  295.86
   2   0  12 9366.14  523.92
  -2   0 -12 7894.41  521.73
  -2   0 -12 8502.04  648.12
   2   0  13 1038.95  113.29
  -2   0 -13  964.40  221.98
  -2   0 -13 1030.31  367.35
  -2   0 -14  328.93  370.62
  -2   0 -14  435.11  490.35
  -2   0 -15 1397.24  673.38
   2   0  17 1472.78  290.52
   2   1 -16   27.79   73.65
  -2  -1  16   -5.09  177.87
   2   1 -15 2064.20  462.83
  -2  -1  15 2028.66  436.31
   2   1 -14 1324.36  812.49
  -2  -1  14 1279.11  533.93
   2   1 -13   50.33  133.41
  -2  -1  13   28.90  205.85
   2   1 -12   18.47   80.50
   2   1 -12   47.48  166.92
  -2  -1  12   16.28  169.36
   2   1 -11  391.00  150.45
   2   1 -11  548.43  517.59
  -2  -1  11  441.73  291.71
   2   1 -10 5714.30  266.49
   2   1 -10 5243.23  425.46
  -2  -1  10 6557.83  527.12
   2   1  -9 1396.05  197.66
   2   1  -9 1153.29  237.35
  -2  -1   9 1153.63  276.84
   2   1  -8  998.84  194.72
   2   1  -8  874.10  350.63
  -2  -1   8  952.30  257.45
   2   1  -7 1117.18  184.13
   2   1  -7  850.57  336.01
  -2  -1   7  971.28  235.88
   2   1  -6 4422.63  223.60
   2   1  -6 3961.76  230.38
  -2  -1   6 3920.59  299.22
   2   1  -5  589.97  142.33
   2   1  -5  628.73  280.33
  -2  -1   5  674.04  240.44
   2   1  -412381.50  546.73
   2   1  -414377.21  658.04
  -2  -1   413302.38  635.42
   2   1  -3 5810.73  243.37
   2   1  -3 5638.55  282.81
  -2  -1   3 7063.86  260.55
  -2  -1   3 6061.50  349.82
   2   1  -210312.67  384.31
   2   1  -2 9124.05  345.93
  -2  -1   211242.56  364.90
  -2  -1   211478.59  373.33
  -2  -1   2 9777.41  398.71
   2   1  -1  511.40  137.47
   2   1  -1  547.80  160.71
   2   1  -1  374.40  213.93
  -2  -1   1  471.28   78.84
  -2  -1   1  476.55  207.09
  -2  -1   1  576.85  104.20
   2   1   010952.91  337.61
   2   1   013657.46  404.07
   2   1   011999.20  383.21
  -2  -1   012506.64  335.89
  -2  -1   011196.69  389.25
  -2  -1   012187.77  347.62
   2   1   1 2219.12  152.01
   2   1   1 2483.39  189.10
   2   1   1 2500.96  203.39
  -2  -1  -1 2450.11  127.66
  -2  -1  -1 1985.22  176.82
  -2  -1  -1 2531.67  157.79
   2   1   2 6764.67  252.53
   2   1   2 8457.11  295.10
   2   1   2 7663.18  218.90
  -2  -1  -2 7505.82  201.91
  -2  -1  -2 7128.55  302.50
  -2  -1  -2 8530.17  279.37
   2   1   311506.63  389.89
   2   1   313180.59  423.72
  -2  -1  -312815.33  474.67
  -2  -1  -313714.19  432.81
   2   1   426956.39 1090.89
  -2  -1  -424443.43 1014.70
  -2  -1  -426192.79 1057.53
   2   1   531330.76 1272.39
  -2  -1  -541434.42 1647.40
  -2  -1  -536972.84 1496.34
   2   1   6 1804.83  147.32
  -2  -1  -6 2018.82  136.63
  -2  -1  -6 1402.50  190.59
   2   1   7 5778.06  235.32
   2   1   7 6213.03  146.85
  -2  -1  -7 5780.81  181.13
  -2  -1  -7 5750.83  190.12
  -2  -1  -7 4874.78  332.46
   2   1   8 7035.80  243.68
   2   1   8 7025.61  171.48
  -2  -1  -8 7013.56  280.82
  -2  -1  -8 7243.12  223.83
  -2  -1  -8 6043.80  435.05
   2   1   9   -6.45   32.02
   2   1   9   17.07   57.31
   2   1   9   25.36   66.43
  -2  -1  -9   -0.83   37.33
  -2  -1  -9   -9.62   99.94
   2   1  10  132.05  102.26
   2   1  10  192.69   91.38
   2   1  10  138.03   62.83
  -2  -1 -10  118.41  113.97
  -2  -1 -10  140.78  259.61
   2   1  11 7266.20  259.33
   2   1  11 6972.29  236.26
  -2  -1 -11 7575.98  360.52
  -2  -1 -11 7374.55  528.89
   2   1  12 5119.02  304.01
  -2  -1 -12 5261.49  446.02
  -2  -1 -12 5137.25  653.87
   2   1  13  108.12   69.97
  -2  -1 -13  135.62  126.17
  -2  -1 -13  121.55  196.61
  -2  -1 -14 3241.73  467.43
  -2  -1 -14 3013.77  475.87
  -2  -1 -15  111.48  160.31
  -2  -1 -16  128.33  203.14
  -2  -1 -17  727.02  351.07
   2   2 -16    6.15  110.99
  -2  -2  16   28.89  167.48
   2   2 -15 1360.55  700.37
  -2  -2  15 1601.43  452.24
   2   2 -14   15.87   70.65
  -2  -2  14  116.18  290.60
   2   2 -13  207.21  332.00
  -2  -2  13  371.70  412.55
   2   2 -12 3669.78  417.38
   2   2 -12 3951.79  769.60
  -2  -2  12 4192.05  700.72
   2   2 -1110818.52  570.87
   2   2 -1112651.07  849.48
  -2  -2  1113028.37  906.72
   2   2 -10   47.24  118.16
   2   2 -10   42.06  156.83
  -2  -2  10   26.50  156.22
   2   2  -9 2850.91  248.78
   2   2  -9 2531.20  352.50
  -2  -2   9 3128.92  429.55
   2   2  -8 8235.10  598.04
   2   2  -8 7579.20  756.36
  -2  -2   8 7172.71  612.59
   2   2  -7   60.56  129.44
   2   2  -7  124.18  126.79
  -2  -2   7   81.63  219.62
   2   2  -6 1310.78  202.29
   2   2  -6 1220.20  177.76
  -2  -2   6 1216.32  290.01
   2   2  -510179.35  347.05
   2   2  -5 9816.24  373.03
  -2  -2   5 9647.80  414.16
   2   2  -4 3075.12  214.26
   2   2  -4 3247.62  325.19
  -2  -2   4 3182.93  273.56
   2   2  -3 1885.78  166.82
   2   2  -3 1702.46  177.73
  -2  -2   3 1744.71  239.21
   2   2  -2 9885.61  360.37
   2   2  -2 9579.29  385.07
  -2  -2   212362.35  409.30
  -2  -2   210529.37  424.63
   2   2  -1   33.26  130.16
   2   2  -1  -16.45   83.64
  -2  -2   1   -1.41   35.46
  -2  -2   1    3.03  116.96
   2   2   0 6532.68  282.57
   2   2   0 7490.90  289.84
   2   2   0 8246.36  340.38
  -2  -2   0 7399.56  341.36
  -2  -2   0 8201.93  287.18
   2   2   1 4852.85  237.75
   2   2   1 5725.53  284.67
   2   2   1 5206.03  221.84
  -2  -2  -1 5591.95  213.11
  -2  -2  -1 5275.94  296.62
  -2  -2  -1 6398.09  254.64
   2   2   217338.91  549.98
   2   2   221021.53  883.22
  -2  -2  -219735.62  792.85
  -2  -2  -219028.66  549.16
  -2  -2  -218528.41  611.90
  -2  -2  -219385.04  796.79
   2   2   3 2833.27  192.82
  -2  -2  -3 3309.52  163.88
  -2  -2  -3 3112.45  152.61
  -2  -2  -3 3441.88  156.43
  -2  -2  -3 3462.86  314.20
   2   2   4 1732.83  158.59
  -2  -2  -4 2171.91  128.90
  -2  -2  -4 1911.01   85.93
  -2  -2  -4 2038.77  100.60
  -2  -2  -4 1768.83  214.85
   2   2   5 9339.04  435.08
   2   2   511948.12  476.17
  -2  -2  -511546.98  464.82
  -2  -2  -512438.62  532.06
  -2  -2  -510208.73  496.36
   2   2   6   67.98  120.27
   2   2   6   30.94   54.23
  -2  -2  -6   33.32   58.73
  -2  -2  -6   70.75  101.50
  -2  -2  -6   34.46   84.26
   2   2   7  848.45  130.67
   2   2   7  821.30   82.96
  -2  -2  -7  962.49  110.33
  -2  -2  -7  830.31  101.22
  -2  -2  -7  739.21  248.98
   2   2   8  152.58   97.11
   2   2   8  116.52   56.60
  -2  -2  -8  187.46  116.56
  -2  -2  -8  131.40   63.47
  -2  -2  -8  169.69  194.12
   2   2   9 3836.77  196.70
   2   2   9 3935.66  183.72
  -2  -2  -9 4220.65  232.92
  -2  -2  -9 3822.05  184.04
  -2  -2  -9 3533.65  343.23
   2   2  10 5446.72  368.71
   2   2  10 5774.74  388.15
  -2  -2 -10 5783.00  400.61
  -2  -2 -10 4750.12  792.59
   2   2  11 4721.42  213.38
   2   2  11 4595.79  197.07
  -2  -2 -11 4751.85  296.63
  -2  -2 -11 4295.67  499.62
   2   2  12   24.75   80.27
  -2  -2 -12   28.02   67.42
  -2  -2 -12   25.18  108.60
   2   2  13  148.59   70.29
  -2  -2 -13  196.48  161.50
  -2  -2 -13  162.37  257.89
  -2  -2 -14  354.91  290.93
  -2  -2 -14  365.25  395.60
  -2  -2 -15   68.55  113.62
  -2  -2 -16  114.13  375.27
  -2  -2 -17  292.53  495.61
   2   3 -15  373.20  587.96
  -2  -3  15  607.34  399.65
   2   3 -14   55.71  127.24
  -2  -3  14  223.05  246.75
   2   3 -13 1363.82  240.19
   2   3 -13 1614.76  712.92
  -2  -3  13 1643.59  416.03
   2   3 -12   44.28  124.01
   2   3 -12   33.02  138.73
  -2  -3  12   19.67  286.57
   2   3 -11   19.71   90.29
   2   3 -11   12.71  154.53
  -2  -3  11   95.10  321.51
   2   3 -10 1081.86  232.63
   2   3 -10 1275.24  680.59
  -2  -3  10 1334.36  442.33
   2   3  -9  -10.96  115.46
   2   3  -9   25.05  116.90
  -2  -3   9   14.22  174.26
   2   3  -8    5.02   99.40
   2   3  -8   -3.66  114.22
  -2  -3   8   32.18  219.95
   2   3  -7   37.56  112.63
   2   3  -7   18.73   96.85
  -2  -3   7  215.44  298.45
   2   3  -6   19.66   94.21
   2   3  -6   -9.38   88.03
  -2  -3   6    8.60  115.96
   2   3  -5 4567.47  238.68
   2   3  -5 4888.12  361.81
  -2  -3   5 4054.10  308.84
   2   3  -4 3818.19  232.24
   2   3  -4 3572.83  236.85
  -2  -3   4 3330.21  259.72
   2   3  -3  725.25  156.74
   2   3  -3  571.63  256.71
  -2  -3   3  567.63  205.85
   2   3  -231092.62 2025.09
   2   3  -228955.39 1909.77
  -2  -3   232579.78 2130.81
   2   3  -1 4797.01  318.24
   2   3  -1 3721.40  377.19
  -2  -3   1 4917.70  290.63
  -2  -3   1 4302.41  338.71
   2   3   010350.05  375.89
  -2  -3   011998.96  458.66
   2   3   1 4833.65  311.62
  -2  -3  -1 5176.02  237.30
  -2  -3  -1 4870.36  228.83
  -2  -3  -1 4714.04  284.71
   2   3   223361.33  968.54
  -2  -3  -227995.27 1135.37
  -2  -3  -226748.81 1077.58
  -2  -3  -224463.51 1029.04
   2   3   312513.58  498.83
  -2  -3  -313961.87  420.86
  -2  -3  -313665.21  430.28
  -2  -3  -313472.41  515.47
   2   3   4  788.09  120.07
   2   3   4  970.87   90.60
  -2  -3  -4  993.39  120.90
  -2  -3  -4  828.55  201.05
   2   3   5 1939.59  162.65
   2   3   5 2033.52  123.58
  -2  -3  -5 2147.22  149.42
  -2  -3  -5 1749.05  211.16
   2   3   6 9310.02  294.11
   2   3   6 9620.30  220.81
  -2  -3  -6 9620.74  236.53
  -2  -3  -6 8459.65  326.65
   2   3   7 2951.16  175.18
   2   3   7 2914.65  118.80
  -2  -3  -7 2963.39  136.32
  -2  -3  -7 3002.53  143.14
  -2  -3  -7 2391.03  213.52
   2   3   8 4949.04  325.67
   2   3   8 4580.24  206.77
  -2  -3  -8 4788.13  222.77
  -2  -3  -8 4098.41  405.35
   2   3   9 1463.04  155.57
   2   3   9 1445.14  133.82
  -2  -3  -9 1552.27  154.91
  -2  -3  -9 1419.22  130.68
  -2  -3  -9 1266.69  462.33
   2   3  10 2786.97  150.61
   2   3  10 2777.59  151.53
  -2  -3 -10 3077.59  166.81
  -2  -3 -10 2699.85  135.19
  -2  -3 -10 2571.47  598.95
   2   3  11 2378.52  150.85
  -2  -3 -11 2675.91  231.13
  -2  -3 -11 2329.12  576.00
   2   3  12 2919.20  194.47
  -2  -3 -12 3366.15  323.16
  -2  -3 -12 2951.79  675.07
  -2  -3 -13 7404.88  528.88
  -2  -3 -13 6984.61  749.47
  -2  -3 -14 1294.58  306.08
  -2  -3 -14 1302.02  842.08
  -2  -3 -15    5.44   82.59
  -2  -3 -16  294.14  494.91
  -2  -3 -17   23.89   95.31
   2   4 -15  115.00  273.57
  -2  -4  15  422.90  281.38
   2   4 -14 3053.94  569.35
  -2  -4  14 3122.22  483.95
   2   4 -13 1036.36  215.67
   2   4 -13 1129.00  635.50
  -2  -4  13 1231.37  405.98
   2   4 -12  201.40  243.75
   2   4 -12  173.72  180.35
  -2  -4  12  179.47  246.68
   2   4 -11  255.04  189.75
   2   4 -11  215.97  297.29
  -2  -4  11  265.54  278.83
   2   4 -10 4428.03  352.02
   2   4 -10 4656.47  619.66
  -2  -4  10 4683.52  579.03
   2   4  -919700.80  491.07
   2   4  -917213.64  562.50
  -2  -4   920251.38  694.89
   2   4  -8 2163.35  301.71
   2   4  -8 1828.28  310.37
  -2  -4   8 2080.64  449.44
   2   4  -7   46.99  129.28
   2   4  -7   -4.70   59.00
  -2  -4   7   -3.01  160.27
   2   4  -6  215.80  171.41
   2   4  -6  233.62  283.38
  -2  -4   6   80.52  229.90
   2   4  -5    5.36  117.45
   2   4  -5   -3.51  111.78
  -2  -4   5   13.38  113.67
   2   4  -4   83.74  122.10
   2   4  -4   79.92  135.30
  -2  -4   4   32.33  167.06
   2   4  -318320.41  496.07
   2   4  -315770.53  475.96
  -2  -4   315359.52  482.09
   2   4  -2 1061.11  187.97
  -2  -4   2  948.39  245.13
   2   4  -1 9032.75  451.05
  -2  -4   1 7297.96  380.83
  -2  -4   1 8602.29  498.00
   2   4   0  130.77  146.88
  -2  -4   0   42.74  112.04
  -2  -4   0   48.98  132.03
   2   4   115131.61  672.28
  -2  -4  -116987.11  709.09
  -2  -4  -114662.76  644.43
  -2  -4  -115091.53  684.59
   2   4   2 2545.50  201.15
  -2  -4  -2 2730.54  196.50
  -2  -4  -2 2600.06  188.50
  -2  -4  -2 2850.05  271.46
   2   4   3 3296.32  242.55
  -2  -4  -3 3966.99  237.32
  -2  -4  -3 3249.93  232.52
   2   4   410990.21  514.72
   2   4   415088.16  618.48
  -2  -4  -414288.75  606.99
  -2  -4  -413281.61  623.67
   2   4   5 2587.14  185.29
   2   4   5 2838.45  121.18
  -2  -4  -5 2766.41  152.17
  -2  -4  -5 2515.22  216.54
   2   4   6 4400.27  300.09
   2   4   6 4476.18  158.47
  -2  -4  -6 4410.97  183.29
   2   4   7  607.14  141.46
   2   4   7  584.83   89.93
  -2  -4  -7  529.81  109.85
  -2  -4  -7  470.11  163.93
   2   4   8  294.59  268.49
   2   4   8  226.74   73.80
  -2  -4  -8  284.10  114.05
  -2  -4  -8  262.00  296.82
   2   4   9    4.70   53.17
   2   4   9    3.22   38.43
  -2  -4  -9   29.83   96.95
  -2  -4  -9   -2.77   35.30
  -2  -4  -9    2.77   62.85
   2   4  10  744.93  128.46
   2   4  10  708.47   90.06
  -2  -4 -10  774.50  111.39
  -2  -4 -10  720.25   70.44
  -2  -4 -10  689.54  358.69
   2   4  11  644.10  128.47
  -2  -4 -11  700.88  125.32
  -2  -4 -11  754.67  716.41
   2   4  12  224.09   94.07
  -2  -4 -12  240.40  132.75
  -2  -4 -12  300.05  349.80
  -2  -4 -13 6080.86  605.15
  -2  -4 -13 5774.65  763.70
  -2  -4 -14    9.00   40.98
  -2  -4 -14   -2.40  170.37
  -2  -4 -15 1462.19  652.55
  -2  -4 -16   43.37  124.83
  -2  -4 -17   42.65  134.59
  -2  -5  14  150.43  232.62
   2   5 -13   50.81   95.61
   2   5 -13   29.29  127.22
  -2  -5  13  -15.57  145.09
   2   5 -12 1923.32  363.28
   2   5 -12 1848.96  387.39
  -2  -5  12 1976.78  469.98
   2   5 -11  891.55  253.18
   2   5 -11  725.53  505.04
  -2  -5  11  702.86  295.18
   2   5 -10  745.50  256.37
   2   5 -10  749.43  384.20
  -2  -5  10  688.90  281.18
   2   5  -9  889.82  288.00
   2   5  -9  842.62  617.14
  -2  -5   9  843.28  335.10
   2   5  -810561.55  699.68
   2   5  -8 9494.05  662.27
  -2  -5   8 9606.21  720.25
   2   5  -7  824.32  296.09
   2   5  -7  626.79  196.17
  -2  -5   7  702.59  293.08
   2   5  -6 7841.73  440.81
   2   5  -6 6232.11  338.14
  -2  -5   6 8539.14  539.65
   2   5  -5 3302.01  334.67
  -2  -5   5 4111.77  445.54
   2   5  -4 9518.38  498.29
  -2  -5   4 9557.90  497.58
  -2  -5   4 8802.02  509.64
   2   5  -3 2178.53  260.69
  -2  -5   3 2310.47  271.12
  -2  -5   3 1889.89  275.07
   2   5  -2 4878.59  300.47
  -2  -5   2 4055.65  290.63
  -2  -5   2 4107.69  325.08
   2   5  -1  119.59  163.15
  -2  -5   1   28.03   83.22
  -2  -5   1   62.90  136.86
   2   5   0 1180.81  180.41
  -2  -5   0 1089.47  198.46
  -2  -5   0 1064.67  243.17
   2   5   1  921.39  201.70
  -2  -5  -1  905.40  177.35
  -2  -5  -1  786.52  226.09
   2   5   2 3084.42  253.33
  -2  -5  -2 3347.55  222.80
  -2  -5  -2 2880.89  241.54
   2   5   3 8652.36  342.15
  -2  -5  -310134.99  342.76
  -2  -5  -3 9011.68  373.57
   2   5   4 2929.97  207.57
   2   5   4 3028.00  156.14
  -2  -5  -4 3319.81  197.52
  -2  -5  -4 3016.30  267.78
   2   5   5   39.38  139.31
   2   5   5   12.86   48.19
  -2  -5  -5   35.38  104.58
  -2  -5  -5    6.83   89.60
   2   5   6  197.22  147.43
   2   5   6  198.89   78.69
  -2  -5  -6  206.80  129.72
  -2  -5  -6  226.49  173.28
   2   5   7 3455.08  339.48
   2   5   7 3058.01  233.73
  -2  -5  -7 3088.16  250.59
  -2  -5  -7 2758.14  287.73
   2   5   8 1857.77  230.00
  -2  -5  -8 1654.60  177.46
  -2  -5  -8 1642.60  296.83
   2   5   9  417.03  109.51
  -2  -5  -9  417.68  123.42
  -2  -5  -9  314.04  298.74
   2   5  10 2703.00  201.61
  -2  -5 -10 2574.25  167.13
  -2  -5 -10 2436.08  480.31
   2   5  11 1268.67  157.41
  -2  -5 -11 1191.81  141.79
  -2  -5 -11 1359.61  712.39
  -2  -5 -12 6044.18  411.44
  -2  -5 -12 6640.76  667.24
  -2  -5 -13 1111.73  193.02
  -2  -5 -13 1162.22  648.18
  -2  -5 -14  647.34  391.98
  -2  -5 -15  769.41  636.85
  -2  -5 -16  370.74  647.09
  -2  -5 -17  162.97  294.76
   2   6 -13  897.24  289.15
  -2  -6  13 1264.56  358.85
  -2  -6  13  945.28  349.60
   2   6 -12   25.42   94.64
  -2  -6  12    5.42  189.44
  -2  -6  12   -0.72  120.72
   2   6 -11 1990.93  376.36
  -2  -6  11 2478.42  496.26
  -2  -6  11 1983.99  440.53
   2   6 -10   53.07  216.53
  -2  -6  10   25.51  168.44
  -2  -6  10   -3.61  139.90
   2   6  -9  810.88  254.87
  -2  -6   9  862.58  348.24
  -2  -6   9  820.80  314.91
   2   6  -8 2464.70  396.78
  -2  -6   8 2790.94  411.77
  -2  -6   8 2440.49  380.27
   2   6  -7    3.03  150.29
  -2  -6   7   47.60  213.24
  -2  -6   7   83.13  256.30
   2   6  -6  924.21  262.36
  -2  -6   6  840.19  265.05
  -2  -6   6  892.65  357.08
   2   6  -5 2648.24  300.06
  -2  -6   5 2860.18  296.45
  -2  -6   5 3093.78  361.83
   2   6  -4  356.86  226.46
  -2  -6   4  235.17  224.00
  -2  -6   4  343.29  276.25
   2   6  -3    7.34  139.74
  -2  -6   3    6.51  110.94
  -2  -6   3   97.65  214.15
   2   6  -2 8824.28  643.11
  -2  -6   2 8403.68  624.30
  -2  -6   2 7450.29  576.61
   2   6  -1 8432.30  431.06
  -2  -6   1 7813.46  432.88
  -2  -6   1 7606.54  439.71
   2   6   0  -17.81  111.50
  -2  -6   0   26.61   97.54
  -2  -6   0  -30.13   99.72
   2   6   1  264.31  163.82
  -2  -6  -1  237.77  166.03
  -2  -6  -1  206.60  180.46
   2   6   2 2697.18  239.26
  -2  -6  -2 3237.49  267.65
  -2  -6  -2 2578.28  281.43
   2   6   3  616.63  194.40
  -2  -6  -3  710.86  175.93
  -2  -6  -3  636.30  203.69
   2   6   4 1695.39  234.07
  -2  -6  -4 1720.15  205.61
  -2  -6  -4 1528.36  234.54
   2   6   5 9980.12  708.60
  -2  -6  -5 9593.11  653.81
  -2  -6  -5 8260.67  619.69
   2   6   6 1236.20  237.26
  -2  -6  -6 1134.17  194.03
  -2  -6  -6  917.09  200.90
   2   6   7  234.70  149.45
  -2  -6  -7  277.88  163.37
  -2  -6  -7  129.54  156.25
   2   6   8 3635.18  246.97
  -2  -6  -8 3642.84  232.29
  -2  -6  -8 2749.19  308.85
   2   6   9  336.59  127.83
  -2  -6  -9  385.26  148.50
  -2  -6  -9  385.04  336.68
   2   6  10 9330.83  544.31
  -2  -6 -1010212.31  587.41
  -2  -6 -10 9962.42  735.01
   2   6  11 1366.63  174.22
  -2  -6 -11 1564.16  193.57
  -2  -6 -11 1835.43  619.66
  -2  -6 -12  819.12  171.82
  -2  -6 -12  950.87  567.92
  -2  -6 -13 2277.25  249.28
  -2  -6 -13 2450.53  404.75
  -2  -6 -14 1537.04  847.87
  -2  -6 -15   61.51  235.27
  -2  -6 -16 1147.16  721.19
   2   7 -12  280.49  445.30
  -2  -7  12  495.21  290.87
  -2  -7  12  334.90  284.85
   2   7 -11  440.16  574.99
  -2  -7  11  626.83  350.64
  -2  -7  11  525.14  289.23
   2   7 -10 1512.47  456.64
  -2  -7  10 1661.97  394.61
  -2  -7  10 1568.44  391.23
   2   7  -9  288.43  288.07
  -2  -7   9  301.24  251.07
  -2  -7   9  144.55  193.93
   2   7  -8 3833.96  590.02
  -2  -7   8 3991.96  563.26
  -2  -7   8 3863.52  592.19
   2   7  -7 2634.21  439.56
  -2  -7   7 2573.23  384.10
  -2  -7   7 2393.92  425.30
   2   7  -6 2842.19  458.15
  -2  -7   6 3027.37  419.36
  -2  -7   6 2878.00  441.98
   2   7  -5    2.58  183.95
  -2  -7   5    3.28  148.59
  -2  -7   5   26.88  170.96
   2   7  -4 1739.92  338.60
  -2  -7   4 1863.58  326.63
  -2  -7   4 1955.11  320.51
   2   7  -3 3501.32  304.58
  -2  -7   3 4354.30  374.01
  -2  -7   3 4085.17  369.68
  -2  -7   2 6375.49  372.06
   2   7  -1   47.99  118.42
  -2  -7   1   35.71  116.02
  -2  -7   1   80.84  204.15
   2   7   0 5357.54  442.73
  -2  -7   0 5917.84  502.67
  -2  -7   0 4920.75  453.97
   2   7   1  639.56  221.55
  -2  -7  -1  836.91  237.07
  -2  -7  -1  979.46  258.37
   2   7   2 7693.05  645.88
  -2  -7  -2 7740.37  588.37
  -2  -7  -2 7663.93  649.45
   2   7   3 8861.45  688.99
  -2  -7  -3 9528.42  688.62
  -2  -7  -3 9217.58  730.75
   2   7   4   65.49  181.60
  -2  -7  -4   27.87  102.29
  -2  -7  -4   98.22  226.55
   2   7   5  458.00  196.56
  -2  -7  -5  548.21  207.75
  -2  -7  -5  469.89  238.11
   2   7   6   34.07  131.30
  -2  -7  -6    8.45   98.64
  -2  -7  -6   37.64  168.53
   2   7   7 2248.60  275.68
  -2  -7  -7 2377.48  245.56
  -2  -7  -7 2108.09  279.39
   2   7   8 3172.84  248.42
  -2  -7  -8 3419.37  293.97
  -2  -7  -8 3341.62  365.01
   2   7   925869.53  536.05
  -2  -7  -926758.87  462.84
  -2  -7  -927945.24  949.21
   2   7  10  707.07  179.06
  -2  -7 -10  780.02  178.17
  -2  -7 -10  889.72  476.41
   2   7  11   47.64   84.51
  -2  -7 -11   16.05   92.26
  -2  -7 -11   77.43  184.36
  -2  -7 -12 1124.13  184.84
  -2  -7 -12 1284.80  788.26
  -2  -7 -13  371.92  142.22
  -2  -7 -13  360.45  438.79
  -2  -7 -14 2800.66  672.11
  -2  -7 -15   55.27  194.96
  -2  -7 -16   54.66  113.30
   2   8 -11  126.97  222.19
  -2  -8  11  243.36  252.56
  -2  -8  11  159.76  310.85
   2   8 -10   24.21  137.09
  -2  -8  10   16.57  160.70
  -2  -8  10   31.07  214.57
   2   8  -9  122.04  236.54
  -2  -8   9  212.27  252.36
  -2  -8   9  131.60  231.39
   2   8  -8  661.99  375.36
  -2  -8   8  755.00  318.40
  -2  -8   8  662.94  264.97
   2   8  -7 5426.96  735.81
  -2  -8   7 5856.81  738.78
  -2  -8   7 5071.11  619.19
   2   8  -6  285.63  359.15
  -2  -8   6  129.09  260.12
  -2  -8   6  276.35  322.17
   2   8  -5 8480.11  763.81
  -2  -8   5 9585.42  794.01
  -2  -8   5 8099.78  658.50
   2   8  -4 1636.85  407.42
  -2  -8   4 1703.78  329.15
  -2  -8   4 1516.45  323.42
   2   8  -3 1656.82  386.70
  -2  -8   3 1577.78  322.74
  -2  -8   3 1468.78  277.12
   2   8  -2  673.44  270.11
  -2  -8   2  703.62  283.96
  -2  -8   2  646.15  236.81
   2   8  -1 5519.05  431.18
  -2  -8   1 5730.03  488.03
  -2  -8   1 5598.21  481.28
   2   8   0  342.22  228.26
  -2  -8   0  406.75  239.99
  -2  -8   0  285.92  258.34
   2   8   1  582.94  253.77
  -2  -8  -1  734.83  268.01
  -2  -8  -1  669.58  271.93
   2   8   2 3885.69  370.25
  -2  -8  -2 4067.86  337.34
  -2  -8  -2 4089.29  365.48
   2   8   3  132.93  213.28
  -2  -8  -3  117.13  200.03
  -2  -8  -3  173.90  274.31
   2   8   4   21.56  132.36
  -2  -8  -4   29.00  162.57
  -2  -8  -4    5.71  137.02
   2   8   5 3293.25  329.55
  -2  -8  -5 3612.95  340.44
  -2  -8  -5 3662.98  415.96
   2   8   613433.47  801.27
  -2  -8  -614377.99  840.89
  -2  -8  -613493.39  856.87
   2   8   7  494.62  220.77
  -2  -8  -7  529.91  196.42
  -2  -8  -7  532.47  304.99
   2   8   8 6289.75  402.55
  -2  -8  -8 6852.02  432.11
  -2  -8  -8 6733.76  540.40
   2   8   9 1558.07  271.14
  -2  -8  -9 1557.57  241.15
  -2  -8  -9 1736.73 1009.14
   2   8  10 3229.29  387.01
  -2  -8 -10 3323.50  402.34
  -2  -8 -10 3912.07  633.63
  -2  -8 -11 8901.67  757.90
  -2  -8 -11 9058.03  700.75
  -2  -8 -12   59.08  130.45
  -2  -8 -12  120.31  198.32
  -2  -8 -13  124.44  267.12
  -2  -8 -14   18.09  112.81
  -2  -8 -15  223.73  377.61
   2   9 -10  915.08  629.21
  -2  -9  10 1186.78  348.57
  -2  -9  10 1158.89  337.90
   2   9  -9  106.76  138.76
  -2  -9   9   54.87  159.43
  -2  -9   9   94.71  218.02
   2   9  -8 1132.61  924.80
  -2  -9   8 1761.57  383.72
  -2  -9   8 1712.96  428.12
   2   9  -7  -10.54  169.08
  -2  -9   7   23.02  161.78
  -2  -9   7   70.62  203.41
   2   9  -6  808.52  387.44
  -2  -9   6  909.90  301.70
  -2  -9   6  632.68  203.42
   2   9  -5  286.59  324.85
  -2  -9   5  143.42  214.25
  -2  -9   5  278.55  209.61
   2   9  -4  -15.20  199.54
  -2  -9   4   11.83  172.56
  -2  -9   4    9.39  175.02
   2   9  -3    4.59  185.40
  -2  -9   3   55.81  230.70
  -2  -9   3   51.52  213.61
   2   9  -2 2245.98  387.88
  -2  -9   2 2232.12  360.43
  -2  -9   2 2154.87  317.77
   2   9  -1 6143.25  512.03
   2   9   0  502.27  309.97
  -2  -9   0  419.57  286.99
  -2  -9   0  421.67  227.26
   2   9   1 5088.39  513.72
  -2  -9  -1 5116.91  444.15
  -2  -9  -1 4797.63  393.63
   2   9   2  711.52  370.85
  -2  -9  -2  717.70  233.30
  -2  -9  -2  758.69  265.72
   2   9   3 7540.14  546.23
  -2  -9  -3 8036.48  566.13
  -2  -9  -3 7865.52  559.13
   2   9   4  931.15  238.38
  -2  -9  -4 1142.34  278.34
  -2  -9  -4 1072.23  283.84
   2   9   5 5764.10  472.20
  -2  -9  -5 6282.68  452.82
  -2  -9  -5 5990.49  490.72
   2   9   6 1149.84  308.11
  -2  -9  -6 1277.09  234.87
  -2  -9  -6 1206.72  301.68
   2   9   7  366.78  228.28
  -2  -9  -7  383.41  182.89
  -2  -9  -7  356.93  323.08
   2   9   8  430.96  200.43
  -2  -9  -8  537.54  188.94
  -2  -9  -8  536.08  482.74
   2   9   9   50.46  129.89
  -2  -9  -9    9.32  108.47
  -2  -9  -9  -19.24  152.50
   2   9  10  735.02  155.30
  -2  -9 -10  685.18  173.82
  -2  -9 -10  776.77  733.08
  -2  -9 -11 1638.28  220.15
  -2  -9 -11 1745.93 1037.91
  -2  -9 -12   20.35  131.85
  -2  -9 -12   43.53  110.85
  -2  -9 -13  141.67  312.14
  -2  -9 -14   88.48  212.52
   2  10  -8  196.94  322.07
  -2 -10   8  330.98  256.73
  -2 -10   8  263.19  183.05
   2  10  -7  282.83  317.73
  -2 -10   7  364.16  239.05
  -2 -10   7  276.45  187.14
   2  10  -6 2708.34  767.47
  -2 -10   6 2945.75  392.35
  -2 -10   6 2777.60  429.83
   2  10  -5 2402.57  440.17
  -2 -10   5 2104.10  323.35
  -2 -10   5 1945.62  345.21
   2  10  -4   54.74  260.26
  -2 -10   4   70.03  246.11
  -2 -10   4  116.74  215.00
   2  10  -3  -28.83  185.06
  -2 -10   3   18.65  159.44
  -2 -10   3   24.73  138.73
   2  10  -2  360.35  337.84
  -2 -10   2  122.10  222.48
  -2 -10   2  287.10  211.91
   2  10  -1  265.30  293.32
  -2 -10   1  114.34  214.40
  -2 -10   1  304.29  206.19
   2  10   0  203.30  278.82
  -2 -10   0  177.97  256.30
  -2 -10   0  220.95  212.69
   2  10   1  992.62  398.97
  -2 -10  -1 1038.68  290.08
  -2 -10  -1  950.39  293.86
   2  10   2   27.06  294.85
  -2 -10  -2   28.04  136.14
  -2 -10  -2   -3.70  130.51
   2  10   3   12.56  157.67
  -2 -10  -3  -22.77  124.00
  -2 -10  -3   27.40  120.43
   2  10   4  884.67  262.40
  -2 -10  -4 1140.91  333.41
  -2 -10  -4  964.70  266.20
   2  10   5 1684.69  343.28
  -2 -10  -5 1902.77  310.35
  -2 -10  -5 1733.02  340.50
   2  10   6 4725.82  526.64
  -2 -10  -6 5230.88  515.10
  -2 -10  -6 5008.43  535.36
   2  10   7  516.08  224.93
  -2 -10  -7  588.68  237.71
  -2 -10  -7  588.13  359.07
   2  10   8 1819.68  354.50
  -2 -10  -8 1917.49  340.74
  -2 -10  -8 1967.01  497.10
   2  10   9  320.16  186.08
  -2 -10  -9  340.85  182.57
  -2 -10  -9  417.44  351.55
  -2 -10 -10  348.38  189.07
  -2 -10 -11  129.99  127.69
  -2 -10 -11   95.30  167.80
  -2 -10 -12  328.44  544.98
   2  11  -6   91.21  148.57
  -2 -11   6  140.86  276.40
   2  11  -5  163.61  244.48
  -2 -11   5  259.05  254.30
  -2 -11   5  241.26  152.13
   2  11  -4    4.96  100.84
  -2 -11   4   37.50  133.81
  -2 -11   4   56.74  159.95
   2  11  -3   26.29  208.58
  -2 -11   3   22.39  128.79
  -2 -11   3   22.22  116.88
   2  11  -2 1799.89  528.83
  -2 -11   2 1699.77  311.79
  -2 -11   2 1670.99  322.86
   2  11  -1  165.11  323.61
  -2 -11   1  138.22  189.63
  -2 -11   1  138.03  188.10
   2  11   0  330.70  338.18
  -2 -11   0  290.75  236.34
  -2 -11   0  373.62  200.92
   2  11   1 1027.92  360.67
  -2 -11  -1  960.84  308.56
  -2 -11  -1 1009.36  246.94
   2  11   2  537.67  299.68
  -2 -11  -2  579.02  257.67
  -2 -11  -2  597.15  227.74
   2  11   3   82.33  236.39
  -2 -11  -3   80.04  173.29
  -2 -11  -3   83.66  156.11
   2  11   4 2762.93  493.33
  -2 -11  -4 3030.92  478.37
  -2 -11  -4 2673.21  452.51
   2  11   5 2059.82  389.63
  -2 -11  -5 2071.85  308.85
  -2 -11  -5 1983.15  316.33
   2  11   6  488.31  246.02
  -2 -11  -6  559.30  272.09
  -2 -11  -6  524.83  445.95
   2  11   7  520.47  243.20
  -2 -11  -7  543.85  254.53
  -2 -11  -7  495.65  390.63
   2  11   8   11.24   63.29
  -2 -11  -8   27.72  156.04
  -2 -11  -8   47.47  179.59
  -2 -11  -9  394.07  186.91
  -2 -11  -9  415.97  373.62
  -2 -11 -10   11.81   95.66
  -2 -11 -10   -6.06  134.47
   2  12  -3   -9.51  177.36
  -2 -12   3   70.32  190.08
   2  12  -2  381.86  513.41
  -2 -12   2  521.50  253.35
  -2 -12   2  414.16  181.00
   2  12  -1   99.56  192.77
  -2 -12   1   56.76  158.96
  -2 -12   1  119.47  170.07
   2  12   0  883.06  299.68
  -2 -12   0  810.85  247.48
  -2 -12   0  800.64  227.95
   2  12   1  132.40  230.82
  -2 -12  -1  202.04  210.87
  -2 -12  -1  262.18  226.08
   2  12   2 2306.11  434.97
  -2 -12  -2 2380.27  337.15
  -2 -12  -2 2247.45  366.40
   2  12   3   64.54  225.70
  -2 -12  -3    2.80  145.68
  -2 -12  -3   79.93  165.84
   2  12   4 1332.49  325.64
  -2 -12  -4 1311.50  288.94
  -2 -12  -4 1343.04  292.98
   2  12   5   11.49  149.33
  -2 -12  -5   81.42  192.13
  -2 -12  -5   39.82  118.41
   2  12   6  300.62  637.49
  -2 -12  -6  651.59  226.49
  -2 -12  -6  593.76  480.31
   2  12   7   20.87   70.97
  -2 -12  -7   26.88  114.28
  -2 -12  -7   -4.45  129.63
   2  12   8 1530.61  287.41
  -2 -12  -8 1914.46  361.05
  -2 -12  -8 1984.53  404.17
   3 -12  -1  639.56  242.39
   3 -12  -1  668.77  251.08
   3 -12   0 4327.74  620.07
   3 -12   0 4143.43  597.52
   3 -11  -6 1729.00  301.68
   3 -11  -6 1472.85  325.13
   3 -11  -5 1994.84  298.94
   3 -11  -5 1860.63  341.61
   3 -11  -4  232.23  162.07
   3 -11  -4  212.41  196.50
   3 -11  -3  314.39  186.69
   3 -11  -3  380.17  212.12
   3 -11  -2 3016.05  304.38
   3 -11  -2 3051.52  299.68
   3 -11  -1 1444.94  237.02
   3 -11  -1 1357.18  271.96
   3 -11   0 2390.17  279.49
   3 -11   0 2365.99  313.97
   3 -11   1 1708.99  271.90
   3 -11   1 1762.30  299.53
   3 -11   2 3374.55  304.66
   3 -11   2 3336.08  341.82
   3 -11   3 1333.27  288.88
   3 -11   3 1312.46  258.98
   3 -11   4    3.42  141.52
   3 -11   4   -4.93  110.46
   3 -11   5  463.21  222.42
   3 -11   5  506.82  241.23
   3 -11   6  159.22  172.72
   3 -11   6  235.46  229.92
   3 -10  -9 1374.76  325.60
   3 -10  -8  180.14  276.26
   3 -10  -7  941.37  170.88
   3 -10  -7 1078.67  343.88
   3 -10  -6  832.20  194.94
   3 -10  -6  835.67  353.29
   3 -10  -5  -16.53  119.82
   3 -10  -5   55.56  227.29
   3 -10  -4    2.01  117.57
   3 -10  -4   24.00  162.49
   3 -10  -3  306.19  175.45
   3 -10  -3  366.12  286.23
   3 -10  -2   35.33  121.73
   3 -10  -2   18.71  142.94
   3 -10  -1  382.00  215.93
   3 -10  -1  393.86  264.44
   3 -10   0  792.52  224.12
   3 -10   0  758.21  232.39
   3 -10   1 1466.64  331.43
   3 -10   1 1512.60  336.06
   3 -10   2  547.44  199.25
   3 -10   2  589.16  232.42
   3 -10   3   18.89  125.34
   3 -10   3   16.06  129.79
   3 -10   4   23.12  124.60
   3 -10   4   46.59  181.29
   3 -10   5 1091.72  257.76
   3 -10   5 1098.64  273.24
   3 -10   6 1079.88  329.00
   3 -10   6 1045.08  267.20
   3 -10   7 1011.27  298.77
   3 -10   7  931.03  240.71
   3 -10   8  129.27  237.05
   3 -10   8   32.78  176.35
   3  -9 -10 2183.04  404.75
  -3   9  10 1819.57  359.20
   3  -9  -9   -1.63  170.69
  -3   9   9    4.39   84.58
   3  -9  -8   37.09  258.26
  -3   9   8   -6.81   86.68
   3  -9  -7  114.70  162.32
   3  -9  -7   61.71  280.91
  -3   9   7  101.68  176.81
   3  -9  -6  487.31  204.65
   3  -9  -6  423.09  348.28
  -3   9   6  362.19  170.85
   3  -9  -5   23.99  122.52
   3  -9  -5    0.74  181.64
  -3   9   5   40.45  134.09
   3  -9  -4  765.28  199.43
   3  -9  -4  802.57  315.08
   3  -9  -3   60.13  165.99
   3  -9  -3   12.37  191.44
   3  -9  -2 6346.58  719.90
   3  -9  -2 6217.59  762.88
   3  -9  -1  938.53  253.48
   3  -9  -1  869.47  276.65
   3  -9   0 3944.09  525.03
   3  -9   0 3682.67  503.32
   3  -9   1 1016.17  328.79
   3  -9   1 1034.35  276.78
   3  -9   2  243.51  280.08
   3  -9   2  233.03  194.27
   3  -9   3  632.51  214.39
   3  -9   3  655.70  209.76
   3  -9   4   73.38  203.49
   3  -9   4   33.53  180.76
   3  -9   5 2938.61  418.79
   3  -9   5 2684.57  350.86
   3  -9   6 2007.98  423.81
   3  -9   6 2050.27  388.38
   3  -9   7  412.13  283.65
   3  -9   7  409.80  204.82
   3  -9   8  190.42  209.22
   3  -9   8  180.79  176.54
   3  -9   9 2716.02  328.07
   3  -9   9 2604.31  333.42
   3  -9  10   28.25  192.12
   3  -9  10   42.52   88.84
   3  -8 -12  834.83  283.10
  -3   8  12  636.01  251.80
   3  -8 -11  432.93  288.23
  -3   8  11  315.53  207.55
   3  -8 -10  745.70  323.66
  -3   8  10  492.81  215.77
   3  -8  -9  530.79  342.38
  -3   8   9  438.47  231.02
   3  -8  -8  -14.36   73.64
   3  -8  -8   30.81  254.62
  -3   8   8   34.18  170.40
   3  -8  -7   50.24  132.81
   3  -8  -7  124.05  242.88
  -3   8   7  123.89  189.11
   3  -8  -6 1245.67  234.88
   3  -8  -6 1332.86  347.93
  -3   8   6 1196.18  345.35
   3  -8  -5  261.98  153.53
   3  -8  -5  341.93  290.47
  -3   8   5  269.99  207.07
   3  -8  -4 1275.68  235.66
   3  -8  -4 1231.54  320.88
  -3   8   4 1190.90  241.39
   3  -8  -3  226.70  175.97
   3  -8  -3   72.20  155.95
  -3   8   3  163.85  145.85
   3  -8  -2  455.98  208.74
   3  -8  -2  505.97  264.16
  -3   8   2  419.57  124.95
   3  -8  -1  623.89  225.88
   3  -8  -1  584.36  277.73
   3  -8   0   29.05  139.21
   3  -8   0   -2.13  147.65
   3  -8   1  222.89  233.58
   3  -8   1  243.37  193.12
   3  -8   2 1760.30  333.99
   3  -8   2 1731.92  269.17
   3  -8   3  226.45  200.49
   3  -8   3  182.44  167.59
   3  -8   4 3011.34  396.72
   3  -8   4 2853.39  378.03
   3  -8   5   83.39  210.98
   3  -8   5   90.56  168.02
   3  -8   6  190.27  218.19
   3  -8   6  170.28  186.26
   3  -8   7   92.12  255.33
   3  -8   7   87.49  139.78
   3  -8   8  240.90  317.69
   3  -8   8  203.23  149.13
   3  -8   9  118.73  149.75
   3  -8  10  810.57  263.10
   3  -8  10  797.65  241.08
   3  -8  11 1241.78  271.86
   3  -8  11 1185.57  242.62
   3  -8  12  583.56  245.31
   3  -7 -13  102.35  241.15
  -3   7  13   77.88  217.96
   3  -7 -12  617.17  269.95
  -3   7  12  528.71  272.25
   3  -7 -11  359.51  284.47
  -3   7  11  317.44  311.07
   3  -7 -10   18.04  166.26
  -3   7  10   34.63  181.79
   3  -7  -9 5142.96  543.89
  -3   7   9 4477.18  523.97
   3  -7  -8 1104.47  202.12
   3  -7  -8 1110.21  312.54
  -3   7   8  920.02  236.21
   3  -7  -7 1442.55  239.79
   3  -7  -7 1403.49  300.57
  -3   7   7 1307.49  316.33
   3  -7  -6  103.70  137.61
   3  -7  -6  186.09  258.43
  -3   7   6  127.78  172.39
   3  -7  -5  455.51  185.56
   3  -7  -5  342.37  226.62
  -3   7   5  327.71  207.73
   3  -7  -4  225.47  173.21
   3  -7  -4  186.58  215.98
  -3   7   4  203.56  171.19
   3  -7  -3 2451.25  286.91
   3  -7  -3 2187.90  319.79
  -3   7   3 2106.57  207.98
   3  -7  -2 2374.27  275.21
   3  -7  -2 2488.97  345.67
  -3   7   2 2124.22  203.25
   3  -7  -1   93.81  169.17
   3  -7  -1   35.30  202.53
  -3   7   1   41.37   83.35
   3  -7   0 3849.59  350.75
   3  -7   0 3889.40  350.12
  -3   7   0 3422.56  206.06
   3  -7   1 2127.78  276.67
   3  -7   1 2424.27  317.22
   3  -7   2 2736.16  343.86
   3  -7   2 3129.28  332.63
   3  -7   3 2872.40  368.77
   3  -7   3 2637.00  288.21
   3  -7   4 2097.94  297.34
   3  -7   4 2285.29  281.31
   3  -7   5  367.25  194.78
   3  -7   5  343.20  174.59
   3  -7   6 6016.38  495.82
   3  -7   6 5646.39  440.21
   3  -7   7 4194.11  509.28
   3  -7   7 3747.39  436.98
   3  -7   8  116.60  240.75
   3  -7   8   66.44  144.90
   3  -7   9  731.17  229.05
   3  -7   9  686.89  209.67
   3  -7  10  979.18  271.72
   3  -7  10  872.12  254.30
   3  -7  11  114.04  192.16
   3  -7  11   83.64  140.68
   3  -7  12   80.51  144.78
   3  -7  13  114.24  184.54
   3  -6 -13  578.81  272.05
  -3   6  13  552.84  345.19
   3  -6 -12   78.75  233.75
  -3   6  12   17.35  137.77
   3  -6 -11  789.54  308.08
  -3   6  11  751.23  299.46
   3  -6 -10   75.70  226.84
  -3   6  10   -1.04  126.91
   3  -6  -9   50.72  116.46
   3  -6  -9    9.95  152.50
  -3   6   9   77.12  185.98
   3  -6  -8 7469.73  733.25
   3  -6  -8 7803.46  847.22
  -3   6   8 7193.57  808.78
   3  -6  -7   37.22  128.49
   3  -6  -7   82.90  200.34
  -3   6   7   36.69  136.28
   3  -6  -625742.09 1246.19
   3  -6  -626168.35  661.03
  -3   6   625532.78 1313.74
   3  -6  -5  254.78  160.62
   3  -6  -5  204.94  205.75
  -3   6   5  200.79  214.60
   3  -6  -4  484.53  180.47
   3  -6  -4  430.26  227.52
  -3   6   4  372.31  198.85
   3  -6  -3  801.98  198.42
   3  -6  -3  714.20  240.49
  -3   6   3  719.00  215.02
   3  -6  -2 2011.35  273.03
   3  -6  -2 1692.92  258.47
  -3   6   2 1663.46  188.37
   3  -6  -1 2819.11  248.33
   3  -6  -1 3134.39  305.88
  -3   6   1 2844.37  150.04
  -3   6   1 2566.81  178.65
   3  -6   0 1665.45  227.96
   3  -6   0 1892.04  254.09
  -3   6   0 1900.45  110.41
  -3   6   0 1735.06  158.37
   3  -6   1 5618.75  325.50
   3  -6   1 6657.28  383.19
  -3   6  -1 7033.07  204.36
   3  -6   2 1146.04  217.19
   3  -6   2 1488.81  234.70
   3  -6   3   -8.41  114.47
   3  -6   3   39.51  110.27
   3  -6   4  949.74  200.02
   3  -6   4 1002.53  202.68
   3  -6   5   69.52  110.49
   3  -6   5   62.57  164.90
   3  -6   6 1401.77  219.76
   3  -6   6 1385.73  235.31
   3  -6   7  171.37  228.95
   3  -6   7  159.52  108.40
   3  -6   8  180.35  212.94
   3  -6   8  196.81  160.92
   3  -6   9 2038.95  358.14
   3  -6   9 1998.44  303.97
   3  -6  10  159.37  176.56
   3  -6  10  217.37  187.43
   3  -6  11    4.48  119.12
   3  -6  11   48.10  153.64
   3  -6  12   14.27  104.43
   3  -6  13   22.33   96.32
   3  -6  14 1047.64  240.92
   3  -5 -14  -19.99  145.13
  -3   5  14   15.07  169.75
   3  -5 -13 1178.98  299.91
  -3   5  13 1066.18  306.54
   3  -5 -12 1566.29  313.17
  -3   5  12 1569.26  401.48
   3  -5 -11 1694.06  362.72
  -3   5  11 1663.06  500.05
   3  -5 -10   91.34  225.94
  -3   5  10   34.05  155.29
   3  -5  -9  152.33  113.35
   3  -5  -9  180.53  202.05
  -3   5   9   80.29  231.00
   3  -5  -8  800.09  136.73
   3  -5  -8  868.03  258.36
  -3   5   8  833.63  320.91
   3  -5  -7 3204.32  257.47
   3  -5  -7 3180.71  324.57
  -3   5   7 3042.82  402.41
   3  -5  -614965.94  845.65
   3  -5  -613871.30  848.14
  -3   5   614107.71  884.40
   3  -5  -523538.90  500.91
   3  -5  -519673.04  511.10
  -3   5   523233.98  605.52
   3  -5  -4 5887.92  321.52
   3  -5  -4 5314.62  392.31
  -3   5   4 5908.31  459.72
   3  -5  -3 4407.27  383.11
   3  -5  -3 4343.69  415.58
  -3   5   3 4206.72  435.76
   3  -5  -2  937.27  189.92
   3  -5  -2  970.43  212.59
  -3   5   2  829.92  193.46
   3  -5  -1   87.36  142.12
   3  -5  -1   84.31  135.70
  -3   5   1   74.45   67.51
  -3   5   1   54.91  100.10
   3  -5   0 1030.61  194.68
   3  -5   0 1185.79  216.39
  -3   5   0 1062.35   86.45
  -3   5   0 1040.78  154.58
   3  -5   1 5229.62  419.20
   3  -5   1 5764.16  461.33
  -3   5  -1 5796.54  376.71
  -3   5  -1 6232.75  427.30
   3  -5   2 1095.04  202.99
   3  -5   2 1392.49  227.69
   3  -5   3   54.39  147.37
   3  -5   3   10.48  113.82
  -3   5  -3   15.47   36.58
   3  -5   4 1308.06  205.02
   3  -5   4 1535.22  201.32
   3  -5   5 4860.77  292.45
   3  -5   5 5900.41  305.66
   3  -5   6 2018.39  236.75
   3  -5   6 2011.45  198.28
   3  -5   714835.29  874.41
   3  -5   714541.29  798.44
   3  -5   8 4218.24  374.13
   3  -5   8 4396.95  314.95
   3  -5   9 2890.00  343.93
   3  -5   9 2744.17  279.49
   3  -5  10  711.22  226.49
   3  -5  10  656.98  201.78
   3  -5  11  847.40  211.49
   3  -5  11  730.73  160.92
   3  -5  12  710.47  222.16
   3  -5  13   58.22  184.58
   3  -5  14  622.98  221.79
   3  -5  15  428.66  176.52
   3  -4 -14 2368.86  406.55
  -3   4  14 2190.73  475.80
   3  -4 -13  297.05  252.72
  -3   4  13  213.68  271.37
   3  -4 -12  518.19  271.49
  -3   4  12  430.65  383.36
   3  -4 -11   26.58  150.65
  -3   4  11   50.82  184.48
   3  -4 -10  498.32  124.49
   3  -4 -10  528.71  266.97
  -3   4  10  460.58  407.87
   3  -4  -9   49.10  109.05
   3  -4  -9   85.14  197.09
  -3   4   9    1.86  179.56
   3  -4  -8   92.98   96.25
   3  -4  -8   72.82  174.55
  -3   4   8  112.74  235.53
   3  -4  -7 7139.54  443.21
   3  -4  -7 7137.27  530.74
  -3   4   7 7297.30  602.81
   3  -4  -6 2097.64  224.10
   3  -4  -6 2045.54  246.29
  -3   4   6 2095.23  326.17
   3  -4  -5  293.83  166.83
   3  -4  -5  197.84  205.71
  -3   4   5  277.30  259.30
   3  -4  -413670.09  928.02
   3  -4  -412515.95  889.57
  -3   4   413799.94  963.40
   3  -4  -3 2857.01  272.50
   3  -4  -3 2421.46  289.08
  -3   4   3 2965.48  367.00
   3  -4  -2  191.18  125.82
   3  -4  -2  293.48  166.12
  -3   4   2  267.46  177.90
   3  -4  -1  393.75  159.56
   3  -4  -1  445.30  162.37
   3  -4  -1  366.67   73.55
  -3   4   1  406.03  137.57
   3  -4   0 1087.05  175.30
   3  -4   0 1058.60  190.12
   3  -4   0 1062.01  120.03
  -3   4   0 1033.54  166.74
   3  -4   1  290.99  142.51
   3  -4   1  294.62  142.71
   3  -4   1  267.99   65.77
  -3   4  -1  242.69  105.93
   3  -4   2   35.73  148.72
   3  -4   2   13.57   93.09
   3  -4   2   81.21   94.25
  -3   4  -2   37.43   58.61
   3  -4   3 2201.95  198.87
   3  -4   3 2070.01  207.48
   3  -4   3 2242.23  163.55
  -3   4  -3 2297.28  153.74
   3  -4   4 1238.79  175.95
   3  -4   4 1294.49  207.14
   3  -4   4 1212.73  130.69
  -3   4  -4 1198.49  118.03
   3  -4   5  500.10  148.16
   3  -4   5  639.23  123.23
   3  -4   5  546.40   83.39
  -3   4  -5  588.29  145.13
   3  -4   6  781.49  162.82
   3  -4   6  873.38  131.86
   3  -4   6  717.97   88.96
  -3   4  -6  907.05  151.94
   3  -4   7 1238.73  231.11
   3  -4   7 1200.77  155.35
   3  -4   7 1087.32  111.86
  -3   4  -7 1256.35  186.83
   3  -4   813620.61  825.52
   3  -4   812713.45  700.71
  -3   4  -812845.02  697.94
   3  -4   9 2733.86  297.24
   3  -4   9 2522.46  232.00
  -3   4  -9 2553.20  209.36
   3  -4  10 8315.86  495.00
   3  -4  10 7440.37  407.64
   3  -4  11   28.68  123.53
   3  -4  11  106.52  113.96
   3  -4  12  778.78  225.47
   3  -4  13 1333.07  254.28
   3  -4  14  854.97  211.29
   3  -4  15   20.88  104.37
   3  -3 -14  -11.80  159.08
  -3   3  14  -37.30  166.47
   3  -3 -13  755.43  387.32
  -3   3  13  926.22  372.82
   3  -3 -12  322.72  273.96
  -3   3  12  245.96  301.85
   3  -3 -11   50.94  170.78
  -3   3  11   53.68  304.65
   3  -3 -10 1568.77  172.58
   3  -3 -10 1800.29  333.23
  -3   3  10 1857.45  604.20
   3  -3  -9  116.20  112.54
   3  -3  -9  131.92  248.84
  -3   3   9  108.09  271.15
   3  -3  -8   23.06   66.78
   3  -3  -8   -5.66  112.70
  -3   3   8   95.09  255.39
   3  -3  -7 8520.12  351.53
   3  -3  -7 8035.63  451.65
  -3   3   7 8410.10  563.36
   3  -3  -6 3977.44  264.57
   3  -3  -6 3070.23  260.71
  -3   3   6 3853.50  445.74
   3  -3  -5  863.20  146.55
   3  -3  -5 1054.36  251.35
  -3   3   5  824.51  284.50
   3  -3  -4 1624.43  202.81
   3  -3  -4 1214.61  194.65
  -3   3   4 1580.55  309.54
   3  -3  -3  945.45  162.08
   3  -3  -3  825.54  167.75
  -3   3   3  964.14  258.87
   3  -3  -2 8153.34  397.40
   3  -3  -2 8387.95  420.04
  -3   3   2 8155.76  453.68
   3  -3  -1 7257.25  369.22
   3  -3  -1 8043.42  400.50
  -3   3   1 6714.64  385.46
   3  -3   010999.68  387.22
   3  -3   012500.12  400.01
   3  -3   012851.43  339.12
  -3   3   012554.26  399.21
   3  -3   1   27.45  104.27
   3  -3   1   44.57  154.93
   3  -3   1   80.36  102.07
  -3   3  -1   95.62  142.53
   3  -3   2 7891.47  303.86
   3  -3   2 8741.00  290.35
  -3   3  -2 8907.43  361.25
  -3   3  -2 8233.17  271.00
   3  -3   3 4297.19  254.06
   3  -3   3 4505.17  249.07
   3  -3   3 4251.56  249.03
  -3   3  -3 4439.00  262.08
  -3   3  -3 4416.39  210.58
   3  -3   4  418.89  145.60
   3  -3   4  416.68  109.82
   3  -3   4  340.54   94.95
  -3   3  -4  385.97  113.60
  -3   3  -4  391.93   82.90
   3  -3   5 1884.44  206.01
   3  -3   5 2003.27  142.92
   3  -3   5 1754.47  157.31
  -3   3  -5 1900.93  158.99
  -3   3  -5 1893.61  139.73
   3  -3   6  740.69  221.58
   3  -3   6  750.58  114.49
   3  -3   6  635.75  103.40
  -3   3  -6  738.04  233.90
   3  -3   7 3405.93  350.11
   3  -3   7 3003.94  283.42
   3  -3   7 3229.11  257.36
   3  -3   7 2961.30  242.24
  -3   3  -7 3485.05  369.58
   3  -3   8 4327.20  302.96
   3  -3   8 3664.89  219.74
   3  -3   8 4019.79  217.32
  -3   3  -8 3981.86  300.35
   3  -3   911664.92  720.91
   3  -3   910068.08  550.37
  -3   3  -910078.41  639.66
   3  -3  10  472.78  181.94
   3  -3  10  375.59   99.71
  -3   3 -10  352.79  238.72
   3  -3  11    5.01  115.84
   3  -3  11    4.35   44.49
  -3   3 -11  -11.15   67.44
   3  -3  12  224.48  186.36
  -3   3 -12  199.76  245.58
   3  -3  13  346.32  163.39
   3  -3  14  357.78  155.62
   3  -2 -15   -1.57  156.39
  -3   2  15   67.73  266.58
   3  -2 -14   46.66  163.51
  -3   2  14  -20.38  179.05
   3  -2 -13   75.38  176.96
  -3   2  13   -0.79  168.96
   3  -2 -12 1442.40  656.96
  -3   2  12 1559.32  517.83
   3  -2 -11   65.57  239.76
  -3   2  11   64.05  210.47
   3  -2 -1014365.14  836.69
   3  -2 -1016133.21 1065.60
  -3   2  1015959.04 1171.05
   3  -2  -9    1.47   64.77
   3  -2  -9    7.51  140.34
  -3   2   9  -36.68  206.29
   3  -2  -810230.80  394.83
   3  -2  -810242.59  526.60
  -3   2   810157.98  735.84
   3  -2  -7 4747.30  285.43
   3  -2  -7 4154.96  304.53
  -3   2   7 4238.70  484.26
   3  -2  -6 5256.63  423.20
   3  -2  -6 4256.58  409.49
  -3   2   6 4155.05  514.22
   3  -2  -5 1510.89  210.85
   3  -2  -5 1063.44  193.73
  -3   2   5 1044.71  249.69
   3  -2  -4   76.82  120.29
   3  -2  -4   78.60  111.79
  -3   2   4  106.22  207.18
   3  -2  -3  121.44  126.81
   3  -2  -3   87.68  122.99
  -3   2   3   65.25  121.69
   3  -2  -2 8878.43  325.13
   3  -2  -210431.66  370.41
  -3   2   2 9366.97  382.44
   3  -2  -1  355.93  158.26
   3  -2  -1  355.78  149.56
  -3   2   1  311.26  189.79
   3  -2   011013.88  368.56
   3  -2   012862.90  389.71
  -3   2   011858.72  396.03
   3  -2   111268.19  369.02
   3  -2   113022.71  361.12
   3  -2   113964.57  358.80
  -3   2  -112831.90  396.95
  -3   2  -112261.31  294.75
   3  -2   2   19.64  109.24
   3  -2   2  116.63  146.09
   3  -2   3  955.80  183.09
   3  -2   3 1040.09  133.68
   3  -2   3  781.83  115.55
  -3   2  -3  912.79  146.52
  -3   2  -3  915.00  102.05
   3  -2   4  110.74  106.66
   3  -2   4  124.23   67.55
   3  -2   4  119.72   98.60
  -3   2  -4  102.71  109.10
  -3   2  -4   95.48   48.56
   3  -2   5 4205.29  270.92
   3  -2   5 4286.34  188.16
   3  -2   5 4013.14  235.80
  -3   2  -5 4685.35  272.56
  -3   2  -5 4371.63  191.81
   3  -2   6  223.52  156.26
   3  -2   6  268.26  106.15
   3  -2   6  295.95   78.58
   3  -2   6  238.79  105.20
  -3   2  -6  290.65  128.09
   3  -2   7 5112.27  405.71
   3  -2   7 5104.54  368.46
   3  -2   7 5504.16  363.96
  -3   2  -7 5527.11  521.06
   3  -2   814498.16  558.95
   3  -2   814463.74  405.13
   3  -2   814634.06  200.99
  -3   2  -815640.77  709.93
   3  -2   9 4148.95  286.72
   3  -2   9 3803.31  156.48
  -3   2  -9 4109.64  322.26
   3  -2  10 9921.91  597.43
   3  -2  10 8936.92  477.63
  -3   2 -10 9521.38  649.63
   3  -2  11  908.54  191.74
   3  -2  11  805.46  118.13
  -3   2 -11  742.81  318.50
   3  -2  12   15.94   89.33
  -3   2 -12   29.91  132.33
   3  -2  13  656.27  167.18
  -3   2 -13  492.05  417.24
   3  -2  14  193.60  122.90
  -3   2 -14  184.71  327.46
   3  -1 -15   10.48   97.52
  -3   1  15   79.36  286.09
   3  -1 -14  100.33  210.92
  -3   1  14  278.68  432.34
   3  -1 -13  257.56  235.35
  -3   1  13  301.29  334.28
   3  -1 -12   44.31  150.62
  -3   1  12   33.56  264.75
   3  -1 -11  660.55  171.89
   3  -1 -11  809.20  499.25
  -3   1  11  803.54  472.79
   3  -1 -10 1734.23  220.49
   3  -1 -10 1896.97  648.05
  -3   1  10 1926.08  537.73
   3  -1  -9 1877.11  180.50
   3  -1  -9 2005.16  246.66
  -3   1   9 2055.40  498.98
   3  -1  -8  523.81  163.74
   3  -1  -8  593.38  207.74
  -3   1   8  620.80  367.48
   3  -1  -7  962.90  179.64
   3  -1  -7  910.94  218.61
  -3   1   7  809.31  307.45
   3  -1  -614292.93  944.05
   3  -1  -613667.76  981.75
  -3   1   611600.48  864.03
   3  -1  -5 2527.86  239.78
   3  -1  -5 1872.95  222.24
  -3   1   5 1983.01  319.08
   3  -1  -4  975.97  157.79
   3  -1  -4  956.12  176.71
  -3   1   4  841.82  247.07
   3  -1  -3 1568.21  171.12
   3  -1  -3 1565.40  175.17
  -3   1   3 1281.04  238.82
   3  -1  -2  481.69  146.62
   3  -1  -2  508.38  137.73
  -3   1   2  298.85  152.08
   3  -1  -1 1028.70  165.73
   3  -1  -1 1153.94  159.62
  -3   1   1  831.45  210.51
   3  -1   0 6062.10  251.12
   3  -1   0 6149.67  254.94
  -3   1   0 6235.20  194.43
  -3   1   0 4822.82  263.98
   3  -1   1 8034.30  293.43
   3  -1   1 8277.03  279.86
  -3   1  -1 9069.09  230.60
  -3   1  -1 7381.18  322.30
   3  -1   2  286.10  134.25
   3  -1   2  282.86  108.62
  -3   1  -2  286.87   78.76
  -3   1  -2  286.67  153.90
   3  -1   317446.65  458.91
   3  -1   319074.73  405.86
  -3   1  -319438.42  378.55
  -3   1  -319362.44  474.12
   3  -1   4 8270.83  298.41
   3  -1   4 8197.75  199.95
  -3   1  -4 8317.53  189.24
  -3   1  -4 7863.59  314.27
   3  -1   5  616.83  148.56
   3  -1   5  651.28   57.21
  -3   1  -5  601.20  162.25
   3  -1   6   13.63  135.12
   3  -1   6   15.29   24.54
   3  -1   6   22.43   32.80
  -3   1  -6   25.17   78.78
   3  -1   7  277.82  164.60
  -3   1  -7  210.77  148.78
   3  -1   8  155.25  144.43
  -3   1  -8  133.38  149.10
   3  -1   9 8016.49  380.69
   3  -1   9 7354.03  209.99
  -3   1  -9 8314.79  623.46
   3  -1  10 2981.76  476.69
   3  -1  10 2576.59  160.61
  -3   1 -10 3093.26  502.53
   3  -1  11  371.57  265.38
  -3   1 -11  333.67  362.42
   3  -1  12 2239.97  219.55
  -3   1 -12 1987.63  348.69
   3  -1  13  567.93  165.19
  -3   1 -13  519.85  275.79
   3  -1  14  837.02  161.77
  -3   1 -14  578.32  511.44
  -3   1 -15 1696.24  347.08
  -3   1 -16 1364.47  314.15
  -3   0  15  254.83  341.04
   3   0 -14 1174.35  567.27
  -3   0  14 1390.25  478.49
   3   0 -13 1517.06  559.95
  -3   0  13 1774.46  529.73
   3   0 -12 6851.92  689.32
  -3   0  12 7756.92  887.74
   3   0 -11  130.35  151.89
   3   0 -11  175.16  264.63
   3   0 -10  598.55  193.73
   3   0 -10  691.02  624.21
  -3   0  10  644.14  403.61
   3   0  -9 1620.43  193.69
   3   0  -9 1737.47  277.18
  -3   0   9 1853.31  456.58
   3   0  -8 2087.02  239.66
   3   0  -8 2267.70  330.03
  -3   0   8 1812.56  401.22
   3   0  -7 2819.37  234.42
   3   0  -7 2651.33  481.27
  -3   0   7 2451.83  384.17
   3   0  -6   70.68  142.40
   3   0  -6  227.61  210.89
  -3   0   6  108.26  240.12
   3   0  -5 2188.20  213.74
   3   0  -5 1581.99  282.02
  -3   0   5 1533.68  291.82
   3   0  -4  701.72  160.51
   3   0  -4  709.63  162.83
  -3   0   4  638.94  245.97
   3   0  -3 1210.36  186.86
   3   0  -3 1187.58  194.79
  -3   0   3  945.98  241.81
   3   0  -2 2668.54  182.90
   3   0  -2 2864.79  217.47
  -3   0   2 2389.25  274.31
   3   0  -1 1430.50  190.43
   3   0  -1 1577.24  158.99
  -3   0   1 1155.33  213.53
   3   0   0 6940.50  284.85
   3   0   0 7686.97  290.95
  -3   0   0 8364.42  234.30
  -3   0   0 5913.54  300.62
   3   0   1 9101.04  429.64
   3   0   110249.13  474.12
  -3   0  -110472.90  439.75
  -3   0  -1 9578.34  510.71
   3   0   2  194.99  124.12
   3   0   2  218.68  224.64
  -3   0  -2  200.30   65.98
  -3   0  -2  165.52  146.81
   3   0   314262.83  390.65
  -3   0  -315538.41  304.58
  -3   0  -314050.32  417.13
   3   0   4 1379.57  191.25
   3   0   4 1473.53   48.30
  -3   0  -4 1435.29  103.72
  -3   0  -4 1428.85  228.26
   3   0   5  813.59  151.06
  -3   0  -5  946.50  213.87
   3   0   6 1149.71  172.18
  -3   0  -6 1324.29  194.70
   3   0   7 1335.30  183.96
  -3   0  -7 1270.60  196.10
   3   0   8  693.75  163.66
  -3   0  -8  661.09  249.57
   3   0   911194.02  483.81
  -3   0  -911753.26  740.72
   3   0  10 1452.14  224.93
  -3   0 -10 1648.09  452.88
   3   0  11   43.89   90.39
  -3   0 -11   44.50  196.85
   3   0  12   17.50   77.48
  -3   0 -12   -3.39   56.97
   3   0  13 3499.83  384.89
  -3   0 -13 3437.59  516.55
   3   0  14 1821.27  207.93
  -3   0 -14 1806.58  316.24
  -3   0 -15 2809.27  453.45
  -3   0 -16 1127.46  229.75
  -3   0 -17  178.20  379.78
   3   1 -14 1549.63  721.13
  -3  -1  14 1904.21  511.20
   3   1 -13   26.96   81.89
  -3  -1  13   87.67  249.80
   3   1 -12  415.42  428.61
  -3  -1  12  685.14  489.73
   3   1 -11 1303.88  272.36
   3   1 -11 1487.21  407.70
  -3  -1  11 1716.85  550.74
   3   1 -10  160.99  156.23
   3   1 -10  117.23  213.52
  -3  -1  10  143.20  328.13
   3   1  -9 1185.73  203.44
   3   1  -9 1124.67  593.20
  -3  -1   9 1374.06  353.89
   3   1  -8  960.23  227.43
   3   1  -8 1026.26  329.80
  -3  -1   8 1144.15  382.55
   3   1  -7  157.55  130.37
  -3  -1   7  191.79  320.76
   3   1  -6 5133.93  416.90
   3   1  -6 5581.14  632.80
  -3  -1   6 3926.65  437.04
   3   1  -5 1252.62  205.33
   3   1  -5  987.06  211.52
  -3  -1   5  977.14  258.93
   3   1  -4 4641.06  299.30
   3   1  -4 4123.35  297.93
  -3  -1   4 3803.75  343.47
   3   1  -3 4329.94  258.52
   3   1  -3 4424.95  308.37
  -3  -1   3 3800.70  322.77
   3   1  -2 1176.97  175.75
   3   1  -2 1320.78  177.57
  -3  -1   2 1278.55  271.55
   3   1  -1   11.49   95.78
   3   1  -1    7.00   49.36
  -3  -1   1  -24.66  102.76
   3   1   0 1092.98  166.14
   3   1   0 1155.25  171.88
  -3  -1   0 1231.51  141.82
  -3  -1   0  868.43  220.36
   3   1   1  799.10  160.97
   3   1   1  924.88  134.56
  -3  -1  -1  887.95  101.64
  -3  -1  -1  689.93  175.52
   3   1   2 1697.47  153.66
   3   1   2 1869.97  115.61
  -3  -1  -2 1949.25  104.67
  -3  -1  -2 1479.55  216.06
   3   1   312043.78  365.12
   3   1   313270.80  273.82
  -3  -1  -312727.64  252.36
  -3  -1  -310991.44  377.47
   3   1   4  259.77  137.55
  -3  -1  -4  190.51  159.61
   3   1   5 1299.74  181.34
  -3  -1  -5 1435.76  214.30
   3   1   6 3275.55  210.43
  -3  -1  -6 3337.81  279.19
   3   1   7 6546.15  336.48
  -3  -1  -7 5734.92  360.32
   3   1   8  802.43  158.76
  -3  -1  -8  664.31  221.83
   3   1   9 4191.37  275.80
  -3  -1  -9 4286.93  773.69
   3   1  10 4938.01  252.13
  -3  -1 -10 5406.98  462.42
   3   1  11 2551.54  205.05
  -3  -1 -11 2975.32  746.83
   3   1  12  937.97  142.52
  -3  -1 -12 1045.40  533.47
   3   1  13  599.75  145.97
  -3  -1 -13  624.54  418.31
  -3  -1 -14  699.66  426.51
  -3  -1 -15  738.50  535.95
  -3  -1 -16  477.55  472.13
  -3  -1 -17   -5.86   72.63
   3   2 -14   61.01   84.20
  -3  -2  14   73.48  269.61
   3   2 -13  374.59  472.52
  -3  -2  13  590.41  509.42
   3   2 -12  801.36  219.07
   3   2 -12 1051.03  585.72
  -3  -2  12  946.66  550.47
   3   2 -11 3349.07  443.15
   3   2 -11 3543.99  785.27
  -3  -2  11 3623.76  650.04
   3   2 -10  179.87  154.70
   3   2 -10  198.44  218.53
  -3  -2  10  279.25  414.01
   3   2  -9    9.60  101.81
   3   2  -9   32.30   73.31
  -3  -2   9  136.39  259.92
   3   2  -8  -10.25  123.10
   3   2  -8   52.03  166.58
  -3  -2   8   41.38  228.74
   3   2  -7  459.43  210.45
   3   2  -7  510.65  506.38
  -3  -2   7  290.77  232.26
   3   2  -6  744.83  236.97
   3   2  -6  665.99  389.10
  -3  -2   6  618.74  283.29
   3   2  -5 5446.89  451.77
   3   2  -5 4651.66  439.56
  -3  -2   5 4336.88  463.17
   3   2  -4 8086.13  412.51
   3   2  -4 8360.24  455.45
  -3  -2   4 7481.17  481.04
   3   2  -311876.37  530.57
   3   2  -312223.11  616.23
  -3  -2   311087.68  577.61
   3   2  -214329.45  438.30
   3   2  -215835.52  741.68
  -3  -2   213213.11  481.13
   3   2  -1 8969.49  335.99
   3   2  -1 9182.18  328.80
  -3  -2   1 8087.71  398.17
   3   2   010572.28  357.35
   3   2   012665.93  607.14
  -3  -2   012564.83  327.82
  -3  -2   011932.41  459.06
   3   2   1 3374.30  189.17
   3   2   1 3434.94  293.79
  -3  -2  -1 3411.79  141.93
  -3  -2  -1 2710.22  260.03
   3   2   2  456.62  116.05
   3   2   2  486.59   89.81
  -3  -2  -2  544.01   92.91
  -3  -2  -2  459.72  178.94
   3   2   3  -11.62   91.54
  -3  -2  -3   -3.88   31.00
  -3  -2  -3   21.30   59.17
  -3  -2  -3  -14.24  103.37
   3   2   4 4008.28  230.22
  -3  -2  -4 4663.13  118.73
  -3  -2  -4 4410.43  120.52
  -3  -2  -4 3637.40  277.92
   3   2   5 1091.55  162.25
  -3  -2  -5 1212.76  226.62
   3   2   6 1524.49  171.55
  -3  -2  -6 1318.81  211.22
   3   2   7 2696.69  244.99
  -3  -2  -7 1930.37  255.28
   3   2   8  186.28  123.41
  -3  -2  -8  161.49  205.63
   3   2   9  447.20  159.24
  -3  -2  -9  433.70  352.25
   3   2  10  222.61  127.02
  -3  -2 -10  228.24  192.93
   3   2  11 9560.60  500.20
  -3  -2 -1110445.09  960.31
   3   2  12  343.04  157.16
  -3  -2 -12  369.86  459.53
   3   2  13 1425.37  201.90
  -3  -2 -13 1423.71  623.53
  -3  -2 -14   14.63   84.67
  -3  -2 -15 1279.12  637.96
  -3  -2 -16  113.29  275.27
  -3  -2 -17 4642.31  662.90
  -3  -3  14  280.35  329.76
   3   3 -13  866.77  697.60
  -3  -3  13  864.80  356.65
   3   3 -12 5236.30  400.34
   3   3 -12 5854.20  683.30
  -3  -3  12 5556.06  660.64
   3   3 -11  421.87  180.76
   3   3 -11  489.95  660.99
  -3  -3  11  531.39  497.02
   3   3 -10 6125.48  681.38
   3   3 -10 6557.10  782.86
  -3  -3  10 6325.46  853.35
   3   3  -9 2563.42  303.21
   3   3  -9 2673.68  510.42
  -3  -3   9 2360.68  477.45
   3   3  -8 8032.99  531.46
   3   3  -8 7939.94  873.22
  -3  -3   8 7352.80  573.56
   3   3  -7  254.98  205.27
   3   3  -7  331.89  363.23
  -3  -3   7  285.86  235.17
   3   3  -6   18.54  141.41
   3   3  -6   13.01   54.95
  -3  -3   6  -43.92  120.51
   3   3  -5   22.12  138.48
   3   3  -5   54.15  135.75
  -3  -3   5   29.40  183.29
   3   3  -4  193.83  183.17
   3   3  -4  351.17  325.23
  -3  -3   4  212.16  209.83
   3   3  -3  783.16  180.38
   3   3  -3  889.13  342.80
  -3  -3   3  672.30  243.50
   3   3  -2 2768.58  249.80
   3   3  -2 3077.46  263.93
  -3  -3   2 2493.28  283.52
   3   3  -1    3.44  101.77
   3   3  -1  -26.84   96.02
  -3  -3   1   29.90  151.17
   3   3   0 3795.70  257.05
   3   3   0 4410.83  281.56
  -3  -3   0 4007.74  311.08
   3   3   1 8153.96  302.47
  -3  -3  -1 8683.04  256.15
  -3  -3  -1 7576.04  365.11
   3   3   2 2136.37  177.41
  -3  -3  -2 2187.21  138.14
  -3  -3  -2 2149.55  150.47
  -3  -3  -2 1883.13  224.86
   3   3   3 9720.79  448.19
  -3  -3  -3 9506.04  356.39
  -3  -3  -310218.65  404.46
  -3  -3  -3 9163.00  488.88
   3   3   4    8.93   99.77
  -3  -3  -4    5.63   23.26
  -3  -3  -4   60.58   80.01
  -3  -3  -4   71.22  159.05
   3   3   5 3080.96  228.37
  -3  -3  -5 3560.44  151.90
  -3  -3  -5 3376.69  147.21
  -3  -3  -5 3017.84  266.76
   3   3   6  118.30  118.06
  -3  -3  -6   39.21   20.78
  -3  -3  -6   30.63   25.71
  -3  -3  -6  102.85  213.40
   3   3   7   17.70  112.62
  -3  -3  -7  -31.44  111.63
   3   3   817254.48  458.63
  -3  -3  -812743.22  526.79
   3   3   9  420.12  156.44
  -3  -3  -9  396.81  304.54
   3   3  1013487.74  747.32
  -3  -3 -1013105.15  970.45
   3   3  11   40.00  150.39
  -3  -3 -11   48.71  172.22
   3   3  12   63.40  116.63
  -3  -3 -12   65.08  205.17
   3   3  13   12.10   61.53
  -3  -3 -13   -4.58  174.32
  -3  -3 -14   12.17  168.03
  -3  -3 -15   85.54  199.96
  -3  -3 -16   33.59  143.81
  -3  -3 -17   43.63  175.66
   3   4 -13  299.08  439.63
  -3  -4  13  268.92  297.32
   3   4 -12 1033.21  243.77
   3   4 -12 1043.35  961.72
  -3  -4  12 1235.29  434.17
   3   4 -11  521.41  231.51
   3   4 -11  508.24  729.14
  -3  -4  11  464.65  309.82
   3   4 -10 1012.50  264.08
   3   4 -10  935.64  677.82
  -3  -4  10  936.09  420.36
   3   4  -9   53.77  172.20
   3   4  -9   14.74   74.39
  -3  -4   9   12.55  191.03
   3   4  -8 1020.02  300.90
   3   4  -8 1096.23  354.17
  -3  -4   8  926.03  385.85
   3   4  -7  710.46  274.77
   3   4  -7  661.69  458.05
  -3  -4   7  677.18  336.44
   3   4  -6 2283.12  381.30
   3   4  -6 1914.87  346.48
  -3  -4   6 1882.76  341.77
   3   4  -5 1232.78  224.30
   3   4  -5 1292.18  622.00
  -3  -4   5 1195.91  349.52
   3   4  -4 2659.95  276.33
   3   4  -4 2831.97  506.03
  -3  -4   4 2457.44  313.36
   3   4  -3   12.81  141.32
   3   4  -3   17.40   79.98
  -3  -4   3  -22.54  110.69
   3   4  -213847.64  942.20
   3   4  -215056.36 1154.67
  -3  -4   213046.45  906.87
   3   4  -1  167.16  171.27
  -3  -4   1  190.99  205.06
   3   4   0 8287.16  405.03
  -3  -4   0 7280.37  369.90
  -3  -4   0 6986.20  410.05
   3   4   1  119.94  145.03
  -3  -4  -1  116.82  138.29
  -3  -4  -1  125.70  182.92
   3   4   2   30.66   97.32
  -3  -4  -2   19.55   45.80
  -3  -4  -2   36.83  113.27
  -3  -4  -2   21.30  152.87
   3   4   3  536.07  151.75
  -3  -4  -3  523.87  126.34
  -3  -4  -3  599.95  146.62
  -3  -4  -3  498.74  206.42
   3   4   4 1736.78  188.24
  -3  -4  -4 2028.94  146.44
  -3  -4  -4 2239.93  156.91
  -3  -4  -4 1903.74  245.96
   3   4   5 5989.43  460.70
  -3  -4  -5 6078.99  401.75
  -3  -4  -5 6401.35  419.67
  -3  -4  -5 5603.93  486.87
   3   4   6 3380.71  311.75
  -3  -4  -6 3183.86  228.83
  -3  -4  -6 3488.80  242.06
  -3  -4  -6 2748.54  316.74
   3   4   7    9.45  111.53
  -3  -4  -7    9.55   21.57
  -3  -4  -7    0.39   22.65
  -3  -4  -7   -0.36  121.54
   3   4   8  741.88  162.48
  -3  -4  -8  782.06   75.59
  -3  -4  -8  644.80  257.37
   3   4   9 4651.74  331.76
  -3  -4  -9 4941.02  269.39
  -3  -4  -9 4318.04  419.23
   3   4  10 4121.50  280.13
  -3  -4 -10 4088.96  467.67
   3   4  11 2103.50  173.49
  -3  -4 -11 2414.99  612.95
   3   4  12  423.35  144.50
  -3  -4 -12  519.19  574.85
  -3  -4 -13  357.35  395.54
  -3  -4 -14  159.09  328.88
  -3  -4 -15   75.63  160.27
  -3  -4 -16  106.23  207.74
   3   5 -13   17.95  132.05
  -3  -5  13   69.17  203.03
   3   5 -12  648.38  218.01
   3   5 -12  552.19  832.63
  -3  -5  12  744.65  363.60
   3   5 -11 3252.85  379.02
   3   5 -11 3324.09  586.78
  -3  -5  11 3137.82  458.10
   3   5 -10  989.80  325.11
   3   5 -10  945.15  772.34
  -3  -5  10  911.09  323.96
   3   5  -9 1097.94  305.43
   3   5  -9  980.80  645.73
  -3  -5   9  932.40  398.76
   3   5  -8   30.50  143.87
   3   5  -8    2.70   85.15
  -3  -5   8   50.31  283.07
   3   5  -7   53.20  228.32
   3   5  -7   30.42   78.25
  -3  -5   7   -7.67  213.68
   3   5  -610307.58  659.79
   3   5  -6 9431.79  649.70
  -3  -5   6 9633.70  794.01
   3   5  -5  720.07  310.64
   3   5  -5  608.72  264.57
  -3  -5   5  684.02  362.70
   3   5  -4 1604.94  343.62
   3   5  -4 1371.80  257.65
  -3  -5   4 1651.63  342.30
   3   5  -3   53.14  158.92
  -3  -5   3   90.68  173.66
  -3  -5   3   29.76  136.86
   3   5  -2   15.61  158.14
  -3  -5   2   45.62  148.11
  -3  -5   2  -16.21  130.04
   3   5  -1  668.63  237.93
  -3  -5   1  771.75  191.96
  -3  -5   1  507.86  202.49
   3   5   012066.81  823.95
  -3  -5   010249.60  704.57
  -3  -5   010402.77  758.76
   3   5   1 2257.28  291.00
  -3  -5  -1 2530.99  290.26
  -3  -5  -1 2185.97  304.57
   3   5   2   72.48  158.99
  -3  -5  -2   40.86  137.93
  -3  -5  -2   55.44  183.11
   3   5   311455.21  792.09
  -3  -5  -312888.32  856.47
  -3  -5  -310407.04  749.66
   3   5   4 4448.20  398.60
  -3  -5  -4 4979.16  376.85
  -3  -5  -4 4553.77  422.44
   3   5   5 7544.24  609.41
  -3  -5  -5 6751.29  467.70
  -3  -5  -5 7379.77  495.00
  -3  -5  -5 6876.68  569.81
   3   5   6  374.49  136.45
  -3  -5  -6  251.84  166.68
  -3  -5  -6  325.54   97.52
  -3  -5  -6  313.46  223.31
   3   5   7  141.91  215.11
  -3  -5  -7   70.99   61.18
  -3  -5  -7  101.72   78.31
  -3  -5  -7   91.36  166.17
   3   5   8   85.77  209.74
  -3  -5  -8   52.97   67.57
  -3  -5  -8   62.57  126.35
   3   5   9   29.50  103.44
  -3  -5  -9   36.18   66.73
  -3  -5  -9   25.53  140.25
   3   5  10 3295.13  239.72
  -3  -5 -10 3496.70  672.78
   3   5  11 1278.52  207.11
  -3  -5 -11 1471.65  667.55
   3   5  12  803.19  162.01
  -3  -5 -12  868.86  816.66
  -3  -5 -13   56.62  148.72
  -3  -5 -14  148.35  189.71
  -3  -5 -15  293.93  350.06
  -3  -5 -16 1535.60  641.94
   3   6 -12   31.96  111.10
  -3  -6  12   19.06  130.64
   3   6 -11 1895.64  307.36
   3   6 -11 1708.49  346.29
  -3  -6  11 1802.21  390.09
   3   6 -10  213.64  242.52
   3   6 -10   51.49  169.29
  -3  -6  10  127.06  240.26
   3   6  -9 1084.67  364.10
  -3  -6   9 1054.52  392.53
   3   6  -8   55.45  210.22
  -3  -6   8   69.80  224.35
   3   6  -7  502.81  296.36
  -3  -6   7  583.47  363.70
  -3  -6   7  496.50  354.40
   3   6  -6 2718.75  473.15
  -3  -6   6 2806.28  427.51
  -3  -6   6 2488.84  439.90
   3   6  -5    3.10  186.10
  -3  -6   5   85.32  286.34
  -3  -6   5   76.62  266.96
   3   6  -4  365.07  327.94
  -3  -6   4  460.74  268.66
  -3  -6   4  282.39  301.64
   3   6  -3  706.56  279.98
  -3  -6   3  744.53  255.70
  -3  -6   3  674.34  373.71
   3   6  -2 2716.28  357.07
  -3  -6   2 3175.94  301.02
  -3  -6   2 2748.79  374.04
   3   6  -1   22.80  141.85
  -3  -6   1   22.84  112.08
  -3  -6   1   53.82  200.26
   3   6   0 2328.54  243.33
  -3  -6   0 2788.56  272.93
  -3  -6   0 2399.15  299.17
   3   6   1 1781.27  244.95
  -3  -6  -1 1897.12  233.96
  -3  -6  -1 1671.43  299.94
   3   6   2  224.69  167.22
  -3  -6  -2  358.52  198.88
  -3  -6  -2  242.80  204.08
   3   6   3 6245.85  416.88
  -3  -6  -3 6573.70  363.69
  -3  -6  -3 5235.11  370.76
   3   6   410587.90  527.09
  -3  -6  -410036.77  390.37
  -3  -6  -4 8450.12  445.47
   3   6   511178.90  506.11
  -3  -6  -510254.25  371.70
  -3  -6  -5 9309.81  496.50
   3   6   613542.78  486.63
  -3  -6  -612317.09  263.20
  -3  -6  -611660.05  509.65
   3   6   717451.24  501.71
  -3  -6  -716690.48  299.72
  -3  -6  -716316.46  984.79
   3   6   8 1190.72  254.05
  -3  -6  -8 1079.36  123.00
  -3  -6  -8 1076.56  274.76
   3   6   911982.96  658.36
  -3  -6  -911551.63  572.29
  -3  -6  -911114.57  742.58
   3   6  10    0.43   97.17
  -3  -6 -10   16.23   61.59
  -3  -6 -10   32.66  103.72
   3   6  11   43.87   91.61
  -3  -6 -11  103.88  179.12
  -3  -6 -12  660.69  674.58
  -3  -6 -14   99.16  204.97
  -3  -6 -15 1322.04  575.41
   3   7 -11 2616.45  442.55
  -3  -7  11 2802.72  518.99
  -3  -7  11 2437.44  521.03
   3   7 -10   16.10  128.65
  -3  -7  10  -17.99  135.76
  -3  -7  10   31.37  135.24
   3   7  -9  109.02  221.90
  -3  -7   9   85.15  227.46
  -3  -7   9   53.15  239.84
   3   7  -8  105.25  222.37
  -3  -7   8   12.11  132.60
  -3  -7   8   -2.32  180.43
   3   7  -7 1593.13  426.04
  -3  -7   7 1666.25  360.41
  -3  -7   7 1611.84  415.40
   3   7  -6   32.53  177.70
  -3  -7   6  -14.88  154.25
  -3  -7   6    2.24  153.81
   3   7  -5   26.33  200.92
  -3  -7   5   38.93  154.77
  -3  -7   5  -30.18  164.96
   3   7  -4 1041.29  354.65
  -3  -7   4 1220.25  340.25
  -3  -7   4 1155.62  416.66
   3   7  -312199.26  817.80
  -3  -7   310811.84  794.63
   3   7  -2 2975.01  366.72
  -3  -7   2 3138.21  366.39
  -3  -7   2 2875.38  465.44
   3   7  -113514.12  839.71
  -3  -7   112979.70  797.08
  -3  -7   112397.24  821.07
   3   7   0  -43.12  153.46
  -3  -7   0  -12.94  109.20
  -3  -7   0   24.61  164.63
   3   7   1  360.09  272.88
  -3  -7  -1  231.06  204.05
  -3  -7  -1  252.60  320.54
   3   7   2 7829.97  631.17
  -3  -7  -2 7627.25  548.15
  -3  -7  -2 7516.29  590.69
   3   7   3 3224.49  416.90
  -3  -7  -3 3312.31  322.02
  -3  -7  -3 3165.75  377.39
   3   7   4 5338.00  513.17
  -3  -7  -4 5094.00  387.41
  -3  -7  -4 5231.98  481.35
   3   7   5   32.08  162.97
  -3  -7  -5   40.31  128.90
  -3  -7  -5   33.58  193.55
   3   7   6 1047.57  241.22
  -3  -7  -6  958.21  153.53
  -3  -7  -6  948.31  269.91
   3   7   7 1223.84  274.47
  -3  -7  -7 1223.80  168.51
  -3  -7  -7 1293.46  300.73
   3   7   8 1216.64  284.42
  -3  -7  -8 1076.12  154.87
  -3  -7  -8 1273.47  304.64
   3   7   9  281.38  152.09
  -3  -7  -9  237.45  117.51
  -3  -7  -9  332.09  254.68
   3   7  10   20.85  110.72
  -3  -7 -10   59.64  162.50
   3   7  11  362.60  164.48
  -3  -7 -11  369.83  400.71
  -3  -7 -12   35.68  199.28
  -3  -7 -13  384.01  501.58
  -3  -7 -14  860.01  651.32
  -3  -7 -15   23.96  137.03
   3   8  -9  776.38  331.85
  -3  -8   9  980.95  326.49
  -3  -8   9  861.22  325.40
   3   8  -8 1742.19  339.09
  -3  -8   8 1827.76  328.76
  -3  -8   8 1651.52  382.43
   3   8  -7   35.85  146.52
  -3  -8   7  -16.85  147.92
  -3  -8   7   56.61  244.75
   3   8  -6    9.59  170.10
  -3  -8   6   26.13  151.05
  -3  -8   6   94.80  262.03
   3   8  -5   -9.87  187.61
  -3  -8   5   -9.62  162.04
  -3  -8   5    5.58  152.71
   3   8  -4   91.49  199.93
  -3  -8   4  142.52  281.70
  -3  -8   4  106.03  265.36
   3   8  -3 2579.98  474.59
  -3  -8   3 2582.89  422.21
  -3  -8   3 2404.33  428.04
   3   8  -2  310.96  301.50
  -3  -8   2  123.96  166.65
  -3  -8   2  281.60  298.77
   3   8  -1 1905.12  344.32
  -3  -8   1 1739.79  289.84
  -3  -8   1 1730.18  358.47
   3   8   0 6936.37  552.12
  -3  -8   0 6471.25  463.83
  -3  -8   0 6678.01  578.85
   3   8   1   30.11  175.60
  -3  -8  -1   82.35  222.45
  -3  -8  -1   71.17  238.43
   3   8   2  870.35  350.93
  -3  -8  -2  847.27  225.42
  -3  -8  -2  860.82  374.27
   3   8   3   67.64  197.91
  -3  -8  -3  194.07  183.73
  -3  -8  -3  162.51  297.15
   3   8   4 1801.71  369.66
  -3  -8  -4 1804.74  220.75
  -3  -8  -4 1826.88  350.70
   3   8   5   26.44  205.46
  -3  -8  -5   18.61  145.32
  -3  -8  -5  107.15  285.83
   3   8   6  527.66  273.04
  -3  -8  -6  537.86  177.65
  -3  -8  -6  630.87  336.45
   3   8   7 4308.31  534.21
  -3  -8  -7 4204.67  457.38
  -3  -8  -7 4497.95  569.98
   3   8   8  302.35  197.99
  -3  -8  -8  249.04  149.08
  -3  -8  -8  212.82  263.50
   3   8   9  575.23  172.96
  -3  -8  -9  581.88  135.22
  -3  -8  -9  620.11  540.67
   3   8  10 4454.08  604.74
  -3  -8 -10 4900.85  728.84
  -3  -8 -11 1872.51 1046.00
  -3  -8 -12 1889.30 1045.12
  -3  -8 -13   32.72  151.37
  -3  -8 -14  826.67  560.53
   3   9  -8   54.36  249.36
  -3  -9   8   41.89  218.73
  -3  -9   8  116.97  273.70
   3   9  -7  120.27  265.23
  -3  -9   7   50.73  138.51
  -3  -9   7  178.75  253.12
   3   9  -6  580.20  296.64
  -3  -9   6  643.09  291.71
  -3  -9   6  553.18  240.36
   3   9  -5  109.50  205.98
  -3  -9   5  104.39  260.17
  -3  -9   5   74.95  255.44
   3   9  -4 2465.97  500.57
  -3  -9   4 2309.69  466.39
  -3  -9   4 2281.64  467.93
   3   9  -3   54.68  186.07
  -3  -9   3   -0.01  137.98
  -3  -9   3  -15.75  151.82
   3   9  -2 4768.41  617.95
  -3  -9   2 4319.15  469.64
  -3  -9   2 4214.58  478.81
   3   9  -1   -9.23  205.73
  -3  -9   1  -14.99  126.30
  -3  -9   1   15.63  152.10
   3   9   0 9709.94 1100.44
  -3  -9   0 9501.18 1051.84
  -3  -9   0 9054.78 1015.97
   3   9   1 1579.65  503.45
  -3  -9  -1 1642.22  324.26
  -3  -9  -1 1462.90  334.18
   3   9   2  782.28  328.61
  -3  -9  -2  828.74  211.99
  -3  -9  -2  790.54  306.28
   3   9   3 1085.00  316.02
  -3  -9  -3 1163.19  252.25
  -3  -9  -3 1121.09  338.25
   3   9   4  419.75  237.01
  -3  -9  -4  542.08  212.85
  -3  -9  -4  518.21  359.41
   3   9   5  275.44  180.33
  -3  -9  -5  358.36  202.02
  -3  -9  -5  354.13  297.60
   3   9   6 1198.10  325.36
  -3  -9  -6 1164.78  235.88
  -3  -9  -6 1235.75  372.50
   3   9   7  380.82  198.18
  -3  -9  -7  363.60  176.81
  -3  -9  -7  311.07  305.88
   3   9   8  859.90  220.01
  -3  -9  -8  930.21  180.98
  -3  -9  -8  884.65  334.89
   3   9   9 3731.05  380.44
  -3  -9  -9 4206.41  520.21
   3   9  10   19.08  104.84
  -3  -9 -10    7.38  178.22
  -3  -9 -11  313.08  380.27
  -3  -9 -12  726.41  529.94
   3  10  -6  409.37  317.23
  -3 -10   6  373.51  303.75
  -3 -10   6  393.02  291.38
   3  10  -5   59.36  170.10
  -3 -10   5   11.92  126.49
  -3 -10   5   28.00  134.14
   3  10  -4  494.39  283.24
  -3 -10   4  399.78  214.98
  -3 -10   4  403.75  247.30
   3  10  -3  -23.65  193.38
  -3 -10   3   34.53  127.10
  -3 -10   3    2.95  126.17
   3  10  -2  188.00  208.56
  -3 -10   2  178.18  252.50
  -3 -10   2  210.99  217.86
   3  10  -1 1132.38  431.50
  -3 -10   1 1150.34  287.55
  -3 -10   1 1044.06  314.35
   3  10   0  833.16  421.77
  -3 -10   0  635.28  242.96
  -3 -10   0  635.92  282.00
   3  10   1 1784.66  527.74
  -3 -10  -1 1748.70  349.80
  -3 -10  -1 1643.44  364.66
   3  10   2  322.26  301.47
  -3 -10  -2  312.03  231.58
  -3 -10  -2  380.59  272.30
   3  10   3   93.57  149.96
  -3 -10  -3   40.52  159.96
  -3 -10  -3   63.68  275.81
   3  10   4  120.41  220.07
  -3 -10  -4  107.16  198.52
  -3 -10  -4  148.70  225.83
   3  10   5 1302.75  338.39
  -3 -10  -5 1520.43  281.13
  -3 -10  -5 1550.29  329.11
   3  10   6 2242.00  345.03
  -3 -10  -6 2449.74  289.23
  -3 -10  -6 2214.73  335.18
   3  10   7  -16.30  103.88
  -3 -10  -7  125.39  170.98
  -3 -10  -7   44.43  173.42
   3  10   8  783.01  271.19
  -3 -10  -8  745.35  175.94
  -3 -10  -8  868.76  261.56
   3  10   9   88.93  119.76
  -3 -10  -9  174.48  281.18
  -3 -10 -10   77.17  188.90
  -3 -10 -11  387.90  553.50
   3  11  -4  243.57  331.20
  -3 -11   4  246.28  255.31
  -3 -11   4  321.61  259.08
   3  11  -3  158.24  178.80
  -3 -11   3  239.94  277.43
  -3 -11   3  156.20  259.48
   3  11  -2  356.55  287.99
  -3 -11   2  289.97  250.79
  -3 -11   2  330.66  264.83
   3  11  -1  163.73  256.51
  -3 -11   1  109.72  234.17
  -3 -11   1  145.49  211.16
   3  11   0   20.95  171.28
  -3 -11   0   70.81  188.39
  -3 -11   0   51.04  157.42
   3  11   1  122.85  162.13
  -3 -11  -1   81.28  177.00
  -3 -11  -1  213.26  224.09
   3  11   2  118.15  279.16
  -3 -11  -2   25.38  108.44
  -3 -11  -2   52.70  209.98
   3  11   3  225.69  237.97
  -3 -11  -3  269.86  219.80
  -3 -11  -3  147.24  221.03
   3  11   4 1993.00  379.38
  -3 -11  -4 2268.04  287.04
  -3 -11  -4 1904.11  298.57
   3  11   5  792.33  286.12
  -3 -11  -5  848.82  222.59
  -3 -11  -5  719.58  274.25
   3  11   6   96.95  193.27
  -3 -11  -6  163.55  195.38
  -3 -11  -6   67.55  188.94
   3  11   7   46.45  202.91
  -3 -11  -7   77.78  158.10
  -3 -11  -7   66.17  234.38
   3  11   8   65.95  147.88
  -3 -11  -8   58.90  163.68
   3  12   2  224.04  234.29
  -3 -12  -2  224.75  208.56
  -3 -12  -2  129.85  182.19
   3  12   3 1275.08  413.42
  -3 -12  -3 1348.24  307.63
  -3 -12  -3 1323.54  335.38
   4 -10  -5  113.74  188.50
   4 -10  -5  110.88  212.79
   4 -10  -4   56.74  166.50
   4 -10  -4   13.77  140.94
   4 -10  -3  514.74  197.79
   4 -10  -3  512.92  240.93
   4 -10  -2  -26.86  136.52
   4 -10  -2   -6.84  130.58
   4 -10  -1  210.34  177.82
   4 -10  -1  220.88  177.69
   4 -10   0  526.12  215.88
   4 -10   0  457.32  212.50
   4 -10   1   74.41  183.12
   4 -10   1   22.04  103.18
   4 -10   2  201.10  166.39
   4 -10   2  209.63  160.86
   4 -10   3 4371.51  504.10
   4 -10   3 3927.39  470.83
   4 -10   4   53.12  141.88
   4 -10   4  142.70  215.52
   4 -10   5  101.00  138.45
   4 -10   5  121.89  178.90
   4  -9  -7   14.49   94.07
   4  -9  -7   32.29  149.25
   4  -9  -6 2623.59  346.29
   4  -9  -6 2495.33  383.37
   4  -9  -5   23.04  113.53
   4  -9  -5   -4.18  143.09
   4  -9  -4  108.28  222.91
   4  -9  -4  -20.04  147.61
   4  -9  -3  300.48  219.81
   4  -9  -3  276.80  200.94
   4  -9  -2   -2.93  135.37
   4  -9  -2    7.60  135.70
   4  -9  -1    5.44  143.05
   4  -9  -1    9.45  122.42
   4  -9   0   70.74  166.79
   4  -9   0   20.94  123.02
   4  -9   1   22.48  144.66
   4  -9   1  106.63  198.08
   4  -9   2  909.15  249.93
   4  -9   2  881.44  212.60
   4  -9   3  365.66  202.35
   4  -9   3  408.51  175.66
   4  -9   4  527.92  222.38
   4  -9   4  570.75  231.54
   4  -9   5 3540.02  350.18
   4  -9   5 3529.27  330.82
   4  -9   6   34.85  142.06
   4  -9   6   47.74  146.21
   4  -9   7  451.36  229.83
   4  -9   7  498.40  186.23
   4  -9   8  249.60  245.59
   4  -8  -9   69.53  207.69
  -4   8   9   84.11  166.33
   4  -8  -8  910.58  281.20
  -4   8   8  768.35  255.17
   4  -8  -7 2338.92  234.78
   4  -8  -7 2249.22  333.85
  -4   8   7 2208.71  379.06
   4  -8  -6   36.35  148.54
   4  -8  -6   34.90  190.54
  -4   8   6   60.42  128.78
   4  -8  -5  747.21  214.00
   4  -8  -5  708.77  276.04
   4  -8  -4  906.82  220.97
   4  -8  -4  879.20  247.81
   4  -8  -3 2107.61  343.59
   4  -8  -3 2295.06  419.94
   4  -8  -2   14.47  135.48
   4  -8  -2   50.35  185.47
   4  -8  -1  407.60  252.46
   4  -8  -1  192.96  186.66
   4  -8   0 1083.61  300.44
   4  -8   0  874.22  236.63
   4  -8   1  174.74  231.24
   4  -8   1  197.64  183.86
   4  -8   2  -29.03  166.13
   4  -8   2  -12.99  107.17
   4  -8   3 2108.67  350.72
   4  -8   3 2051.90  333.57
   4  -8   4 1428.59  297.41
   4  -8   4 1308.31  287.38
   4  -8   5 1083.22  237.72
   4  -8   5 1187.65  274.52
   4  -8   6  693.82  262.35
   4  -8   6  706.94  223.44
   4  -8   7 3134.67  430.99
   4  -8   7 3082.22  306.55
   4  -8   8    4.99  129.03
   4  -8   9  931.95  245.06
   4  -7 -10 1153.37  310.79
  -4   7  10 1195.78  380.28
   4  -7  -9 1221.03  286.82
  -4   7   9 1205.78  335.35
   4  -7  -810756.44  514.34
  -4   7   8 9937.63  766.58
   4  -7  -7  361.42  167.83
   4  -7  -7  394.90  273.16
  -4   7   7  325.54  250.94
   4  -7  -6  230.82  211.54
   4  -7  -6  433.79  281.72
  -4   7   6  306.65  231.54
   4  -7  -5   30.87  114.29
   4  -7  -5   53.96  268.07
  -4   7   5   28.46  134.20
   4  -7  -4   11.45  115.41
   4  -7  -4    0.33  144.51
  -4   7   4   -1.22   79.87
   4  -7  -3 1002.51  226.45
   4  -7  -3  950.10  244.70
  -4   7   3  833.12  202.84
   4  -7  -2 1624.18  293.64
   4  -7  -2 1661.42  299.06
   4  -7  -1 9164.90  957.92
   4  -7  -1 8389.68  855.06
   4  -7   0  217.04  238.20
   4  -7   0  169.62  192.60
   4  -7   1 1517.06  356.98
   4  -7   1 1310.18  268.24
   4  -7   2  421.12  257.18
   4  -7   2  338.29  195.48
   4  -7   3 3946.81  535.92
   4  -7   3 3558.19  428.18
   4  -7   4  -37.84  164.03
   4  -7   4    7.45  130.62
   4  -7   5 2256.31  324.80
   4  -7   5 2041.39  271.32
   4  -7   6   23.38  180.89
   4  -7   6   11.86  109.60
   4  -7   710203.40  565.24
   4  -7   7 9510.73 1150.66
   4  -7   8 1812.23  345.89
   4  -7   9   51.44  144.41
   4  -7  10  685.98  241.01
   4  -7  11   45.79  188.17
   4  -6 -11  677.68  263.13
  -4   6  11  593.19  317.46
   4  -6 -10   30.58  208.59
  -4   6  10   52.06  202.38
   4  -6  -9  334.55  238.58
  -4   6   9  323.17  301.61
   4  -6  -8 7252.62  460.96
   4  -6  -8 7448.89  499.93
  -4   6   8 7294.20  685.64
   4  -6  -7  743.83  174.97
   4  -6  -7  763.43  290.39
  -4   6   7  712.53  329.01
   4  -6  -6  345.59  158.32
   4  -6  -6  426.89  277.94
  -4   6   6  280.61  261.07
   4  -6  -5 3659.48  438.30
   4  -6  -5 3530.03  504.15
  -4   6   5 3268.28  507.52
   4  -6  -4   84.92  166.00
   4  -6  -4  115.86  252.78
  -4   6   4   43.38  169.52
   4  -6  -3  853.45  238.56
   4  -6  -3  808.38  257.06
  -4   6   3  592.27  197.96
   4  -6  -2   10.83  133.25
   4  -6  -2   11.80  126.15
  -4   6   2   14.30   73.69
   4  -6  -1   11.05  151.52
   4  -6  -1   37.80  125.20
  -4   6   1    9.90   62.72
   4  -6   0  618.32  272.62
   4  -6   0  596.99  185.49
  -4   6   0  478.75  132.30
   4  -6   1   59.67  241.00
   4  -6   1   -8.95  119.76
  -4   6  -1    8.38   32.96
   4  -6   2 1644.23  261.79
   4  -6   2 1549.57  213.22
   4  -6   3   21.30  173.99
   4  -6   3    9.53  136.70
   4  -6   4 3062.47  337.00
   4  -6   4 2748.04  269.13
   4  -6   5  191.07  215.07
   4  -6   5  169.17  159.50
   4  -6   6 1992.11  364.78
   4  -6   6 1838.86  296.48
   4  -6   7  147.04  203.14
   4  -6   7  151.92  125.72
   4  -6   8  715.44  262.71
   4  -6   9  773.25  234.31
   4  -6  10 1197.89  268.47
   4  -6  11  520.58  211.45
   4  -6  12 1139.91  288.05
   4  -5 -12   30.14  134.01
  -4   5  12    6.09  166.02
   4  -5 -11  820.24  281.37
  -4   5  11  879.16  409.29
   4  -5 -10   -9.47  153.11
  -4   5  10   41.58  236.85
   4  -5  -9  221.99  120.64
   4  -5  -9  134.44  223.57
  -4   5   9  340.68  349.20
   4  -5  -8  226.27  149.22
   4  -5  -8  156.27  255.13
  -4   5   8  221.03  278.27
   4  -5  -7 4859.79  565.76
   4  -5  -7 4683.40  597.15
  -4   5   7 5181.46  720.65
   4  -5  -6 1778.71  260.75
   4  -5  -6 1819.30  371.17
  -4   5   6 1809.96  394.13
   4  -5  -5  137.55  135.22
   4  -5  -5   82.70  222.48
  -4   5   5  194.90  174.32
   4  -5  -4 2075.53  221.75
   4  -5  -4 1937.42  257.06
  -4   5   4 1846.25  333.61
   4  -5  -3 5261.57  408.70
   4  -5  -3 4742.12  397.96
  -4   5   3 3947.24  347.71
   4  -5  -2  626.43  217.35
   4  -5  -2  555.01  222.42
  -4   5   2  485.62  175.55
   4  -5  -1  479.02  228.32
   4  -5  -1  506.98  205.65
  -4   5   1  409.72  147.37
   4  -5   0   42.46  154.87
   4  -5   0   88.91  236.71
  -4   5   0   23.18   98.24
   4  -5   1  473.47  238.68
   4  -5   1  475.33  195.74
  -4   5  -1  313.24  114.82
   4  -5   2  531.46  209.98
   4  -5   2  514.23  155.16
  -4   5  -2  491.00  115.65
   4  -5   3 3814.97  384.79
   4  -5   3 3425.63  259.32
  -4   5  -3 3462.44  220.74
   4  -5   4  642.83  233.42
   4  -5   4  560.09  150.38
  -4   5  -4  490.85   89.50
   4  -5   5  805.57  244.26
   4  -5   5  665.14  171.84
   4  -5   6   53.49  156.56
   4  -5   6   72.82  131.44
   4  -5   7   80.28  240.80
   4  -5   7   43.03   99.56
   4  -5   8  504.13  306.31
   4  -5   9   19.83  139.61
   4  -5  10  311.54  219.70
   4  -5  11   -7.31  129.83
   4  -5  12    5.87  106.69
   4  -5  13   15.28  112.70
   4  -4 -12 1392.61  359.43
  -4   4  12 1395.64  460.35
   4  -4 -11   32.18  247.49
  -4   4  11   -5.57  166.78
   4  -4 -10 2152.03  390.86
  -4   4  10 2108.94  450.68
   4  -4  -9  231.63  119.63
   4  -4  -9  169.02  257.44
  -4   4   9  287.07  343.05
   4  -4  -8   14.62  102.95
   4  -4  -8   36.67  162.02
  -4   4   8    4.79  178.22
   4  -4  -7 1587.80  248.18
   4  -4  -7 1530.78  345.40
  -4   4   7 1634.85  430.07
   4  -4  -6 1542.82  220.28
   4  -4  -6 1321.10  286.04
  -4   4   6 1375.78  380.79
   4  -4  -5  469.29  165.54
   4  -4  -5  546.02  236.48
  -4   4   5  490.11  276.93
   4  -4  -4 3646.79  321.37
   4  -4  -4 3613.72  322.85
  -4   4   4 3194.79  419.75
   4  -4  -3 1005.11  224.92
   4  -4  -3  951.97  217.49
  -4   4   3  778.31  252.75
   4  -4  -2 3668.64  373.88
   4  -4  -2 3317.74  328.06
  -4   4   2 2805.38  341.34
   4  -4  -1   -2.11  139.02
   4  -4  -1    2.55  104.15
  -4   4   1   30.86  140.24
   4  -4   0  895.66  241.32
   4  -4   0  907.21  179.39
  -4   4   0  776.54  183.66
   4  -4   1  292.52  242.66
   4  -4   1  296.15  150.04
  -4   4  -1  202.00  106.45
   4  -4   2   -0.30  133.03
   4  -4   2   82.11  146.64
  -4   4  -2   46.57  100.42
   4  -4   3  615.37  200.22
   4  -4   3  587.43  115.87
  -4   4  -3  601.09  140.51
   4  -4   4  744.87  219.35
   4  -4   4  697.36  130.98
  -4   4  -4  607.97  134.90
   4  -4   5  649.98  182.32
   4  -4   5  676.81  153.39
  -4   4  -5  574.65  111.54
   4  -4   6 4906.45  409.96
   4  -4   6 4650.67  292.33
  -4   4  -6 4487.11  278.09
   4  -4   7 7788.82  527.41
   4  -4   7 6142.07  325.14
  -4   4  -7 7766.96  491.10
   4  -4   8    9.55  171.18
  -4   4  -8    3.56   37.37
   4  -4   9  901.05  274.01
   4  -4  10 1067.44  250.45
   4  -4  11   95.11  189.61
   4  -4  12   11.55  114.64
   4  -4  13  456.21  198.55
   4  -4  14 1667.17  294.19
   4  -3 -12 1149.49  732.74
  -4   3  12 1378.91  469.09
   4  -3 -11   25.96  167.77
  -4   3  11   92.59  191.56
   4  -3 -10  243.37  339.08
  -4   3  10  175.05  263.37
   4  -3  -9 3416.18  341.38
   4  -3  -9 3505.63  486.93
  -4   3   9 3779.99  713.33
   4  -3  -8  115.59  135.74
   4  -3  -8   81.16  165.62
  -4   3   8   81.17  267.86
   4  -3  -7 5412.71  413.66
   4  -3  -7 5361.07  561.09
  -4   3   7 4928.45  620.25
   4  -3  -6  879.65  182.07
   4  -3  -6  892.27  300.43
  -4   3   6  930.16  411.27
   4  -3  -5 3053.32  296.21
   4  -3  -5 3133.52  352.68
  -4   3   5 2784.66  432.70
   4  -3  -4 1745.48  237.49
   4  -3  -4 1770.05  274.27
  -4   3   4 1482.07  314.47
   4  -3  -3 2329.10  237.54
   4  -3  -3 2329.45  238.34
  -4   3   3 2078.15  341.06
   4  -3  -2  397.80  211.99
   4  -3  -2  382.50  159.45
  -4   3   2  336.74  250.24
   4  -3  -1 1458.55  230.10
   4  -3  -1 1864.30  267.82
  -4   3   1 1550.21  281.07
   4  -3   0  257.34  143.61
   4  -3   0  318.17  148.28
  -4   3   0  324.52  237.88
   4  -3   1 1838.60  264.79
   4  -3   1 2031.92  198.06
  -4   3  -1 1831.09  259.46
   4  -3   2  325.08  174.12
   4  -3   2  480.18  136.26
  -4   3  -2  368.86  124.57
   4  -3   3 2350.01  216.06
   4  -3   3 3071.37  189.47
  -4   3  -3 2607.88  217.35
   4  -3   4   49.53  129.82
   4  -3   4   83.18   97.47
  -4   3  -4   51.46   98.67
   4  -3   5  796.30  183.82
   4  -3   5  734.65  118.20
  -4   3  -5  619.21  121.86
   4  -3   6 5216.87  436.36
   4  -3   6 5040.60  304.10
  -4   3  -6 4613.40  318.61
   4  -3   7 6134.83  489.33
   4  -3   7 5485.50  290.64
  -4   3  -7 5588.36  365.14
   4  -3   8 4227.42  397.08
  -4   3  -8 4091.18  316.79
   4  -3   9 4794.27  542.01
  -4   3  -9 4694.63  540.00
   4  -3  10   87.73  174.27
  -4   3 -10   62.04  113.93
   4  -3  11  154.64  169.52
   4  -3  12 2217.54  275.81
   4  -3  13 1597.48  274.61
   4  -3  14 2877.13  372.12
   4  -2 -13 1687.83  652.94
  -4   2  13 1900.65  566.09
   4  -2 -12  558.18  644.37
  -4   2  12  662.61  435.66
   4  -2 -11  105.44  191.81
  -4   2  11  110.97  276.46
   4  -2 -10    5.24   74.04
   4  -2 -10   12.91   71.66
  -4   2  10    2.09  196.23
   4  -2  -9 4240.84  410.66
   4  -2  -9 4591.90  589.80
  -4   2   9 4645.58  745.79
   4  -2  -8  487.34  198.63
   4  -2  -8  502.72  334.39
  -4   2   8  424.98  409.00
   4  -2  -7   50.55  132.45
   4  -2  -7   43.77  216.20
  -4   2   7  221.43  397.47
   4  -2  -6 1374.80  232.13
   4  -2  -6 1439.87  300.80
  -4   2   6 1190.52  368.72
   4  -2  -5 1269.48  233.28
   4  -2  -5 1335.84  260.69
  -4   2   5 1068.27  314.32
   4  -2  -4  285.03  199.55
   4  -2  -4  308.25  228.58
  -4   2   4  278.95  236.43
   4  -2  -3   18.50  117.76
   4  -2  -3   14.75  114.41
  -4   2   3   53.70  183.79
   4  -2  -2 1029.20  213.46
   4  -2  -2 1240.88  254.05
  -4   2   2 1076.31  303.07
   4  -2  -1 1084.43  205.10
   4  -2  -1 1367.54  227.38
  -4   2   1 1308.77  292.56
   4  -2   0 5597.62  332.77
   4  -2   0 6379.82  329.16
  -4   2   0 5818.50  411.63
   4  -2   1  847.62  178.30
   4  -2   1 1040.36  176.09
  -4   2  -1  952.59  274.78
   4  -2   2   11.53  115.50
   4  -2   2   78.83   83.42
  -4   2  -2  168.28  232.02
   4  -2   3  781.88  174.41
   4  -2   3  807.68  108.33
  -4   2  -3  708.03   84.72
  -4   2  -3  719.45  187.50
   4  -2   4  363.29  130.57
   4  -2   4  476.92  101.49
  -4   2  -4  425.97   71.19
  -4   2  -4  513.75  205.68
   4  -2   5   31.29  133.04
   4  -2   5   78.66   73.31
  -4   2  -5   45.71   59.61
  -4   2  -5   85.38  185.35
   4  -2   6 6359.85  406.24
   4  -2   6 5829.62  199.71
  -4   2  -6 5598.96  305.60
   4  -2   712065.02  912.99
  -4   2  -710763.66  627.26
   4  -2   8  -24.33  168.45
  -4   2  -8   32.82  110.71
   4  -2   9    3.33  136.15
  -4   2  -9    5.56   70.10
   4  -2  10 2020.69  488.82
  -4   2 -10 2028.16  386.85
   4  -2  11  321.61  217.32
  -4   2 -11  293.45  317.33
   4  -2  12 1388.00  261.02
  -4   2 -12 1192.34  282.58
   4  -2  13 2840.30  296.01
  -4   2 -13 2734.61  265.86
   4  -2  14   80.29  122.13
   4  -1 -13   43.47  102.80
  -4   1  13   89.49  315.90
   4  -1 -12   47.01  142.21
  -4   1  12   14.83  179.46
   4  -1 -11   68.28  126.64
  -4   1  11   65.30  253.83
   4  -1 -10    6.18   77.52
   4  -1 -10   19.21  129.22
  -4   1  10    7.72  199.08
   4  -1  -9  525.46  190.18
   4  -1  -9  563.05  673.93
  -4   1   9  434.52  446.56
   4  -1  -8   79.36  122.46
   4  -1  -8   86.40  152.71
  -4   1   8   20.25  237.36
   4  -1  -7 5174.00  425.50
   4  -1  -7 5103.56  583.31
  -4   1   7 4634.67  655.60
   4  -1  -6  506.70  217.58
   4  -1  -6  579.54  559.04
  -4   1   6  431.31  350.61
   4  -1  -5 3673.88  349.31
   4  -1  -5 3565.01  350.29
  -4   1   5 3032.33  441.59
   4  -1  -4  135.05  237.22
   4  -1  -4   77.19  177.44
  -4   1   4  123.15  263.71
   4  -1  -3  400.12  182.37
   4  -1  -3  403.16  233.33
  -4   1   3  366.82  268.49
   4  -1  -211465.56  471.09
   4  -1  -213784.19  572.76
  -4   1   211483.49  592.00
   4  -1  -1 1536.02  198.48
   4  -1  -1 1932.57  229.89
  -4   1   1 1819.74  333.86
   4  -1   0   98.49  142.47
   4  -1   0   84.82  126.93
  -4   1   0  145.58  214.00
   4  -1   1  357.47  159.33
   4  -1   1  405.63  111.41
  -4   1  -1  365.07  211.17
   4  -1   2  928.40  187.78
   4  -1   2 1053.77  124.53
  -4   1  -2 1045.61   99.92
  -4   1  -2  993.08  229.31
   4  -1   315084.19  993.02
   4  -1   316635.93  247.72
  -4   1  -316664.05  201.26
  -4   1  -315922.01 1073.24
   4  -1   4 8582.12  395.13
   4  -1   4 9762.05  292.19
  -4   1  -4 9171.17  266.59
  -4   1  -4 9615.48  455.01
   4  -1   5 7062.74  349.66
   4  -1   5 7612.47  220.38
  -4   1  -5 7587.64  215.44
  -4   1  -5 7258.35  378.11
   4  -1   6  178.65  177.11
  -4   1  -6  225.78  169.13
   4  -1   7  404.37  196.02
  -4   1  -7  387.34  172.53
   4  -1   8   17.82  144.07
  -4   1  -8   47.46  136.79
   4  -1   9 6279.79  409.40
  -4   1  -9 6262.33  474.47
   4  -1  10  162.30  146.54
  -4   1 -10  160.60  161.60
   4  -1  11  173.05  167.87
  -4   1 -11  164.82  239.21
   4  -1  12  263.98  136.45
  -4   1 -12  224.86  338.37
   4  -1  13 2392.97  268.93
  -4   1 -13 2395.83  369.71
   4  -1  14   81.64  168.03
  -4   1 -14   10.92   80.10
  -4   1 -15  104.03  145.10
   4   0 -13 2632.61  527.91
  -4   0  13 3031.35  624.53
   4   0 -12   98.11  170.80
  -4   0  12    6.76  187.39
   4   0 -11  283.27  330.45
  -4   0  11  265.34  308.80
   4   0 -10  589.61  200.64
   4   0 -10  642.15  703.70
  -4   0  10  621.69  359.90
   4   0  -9    5.35   96.08
   4   0  -9   14.95  205.53
  -4   0   9   -7.42  201.26
   4   0  -8 4416.02  487.92
   4   0  -8 4580.51  597.39
  -4   0   8 4284.61  723.08
   4   0  -717905.33 1085.02
   4   0  -718462.52  758.58
  -4   0   716761.28 1218.90
   4   0  -6 3599.26  313.68
   4   0  -6 3632.19  635.14
  -4   0   6 3072.54  547.20
   4   0  -5  746.15  222.34
   4   0  -5  747.74  565.01
  -4   0   5  546.16  326.19
   4   0  -4 4225.11  315.78
   4   0  -4 4304.24  491.52
  -4   0   4 3267.43  457.70
   4   0  -3 2624.99  265.98
   4   0  -3 2968.56  441.36
  -4   0   3 2266.58  360.68
   4   0  -2  151.38  201.33
   4   0  -2  240.31  215.06
  -4   0   2  228.82  295.88
   4   0  -1  332.06  203.29
   4   0  -1  544.34  521.39
  -4   0   1  384.23  295.67
   4   0   0 1524.14  242.96
   4   0   0 1808.55  227.96
  -4   0   0 1526.30  312.94
   4   0   1 3238.21  299.88
   4   0   1 3776.11  310.97
  -4   0  -1 3098.24  366.64
   4   0   2  232.89  149.63
   4   0   2  151.55  150.83
  -4   0  -2  133.03   56.85
  -4   0  -2  132.98  198.96
   4   0   3 1849.11  227.95
   4   0   3 2040.67  216.56
  -4   0  -3 1930.21  155.11
  -4   0  -3 1951.95  288.19
   4   0   4  162.77  114.67
   4   0   4  109.44  107.49
  -4   0  -4  121.25   36.42
  -4   0  -4  200.16  207.46
   4   0   5    5.16  134.01
  -4   0  -5   11.67  152.92
   4   0   6 1523.82  210.57
  -4   0  -6 1647.36  233.44
   4   0   7  546.25  215.58
  -4   0  -7  585.75  210.11
   4   0   8 5809.09  416.72
  -4   0  -8 5631.61  452.31
   4   0   9 8533.16  521.11
  -4   0  -9 8732.61  550.53
   4   0  10   21.47  113.71
  -4   0 -10   24.65   88.02
   4   0  11  847.71  193.92
  -4   0 -11  970.99  366.28
   4   0  12   -8.81   75.91
  -4   0 -12   -4.39   60.98
   4   0  13   27.18  102.45
  -4   0 -13   20.04  114.38
   4   0  14  835.81  170.63
  -4   0 -14  741.31  404.13
  -4   0 -15 4141.62  590.84
   4   1 -12  345.37  386.81
  -4  -1  12  303.71  392.23
   4   1 -11   60.71  149.53
   4   1 -11   94.42  189.76
  -4  -1  11  109.61  328.95
   4   1 -10   44.98  151.10
   4   1 -10  -32.39  176.33
  -4  -1  10   -3.78  177.49
   4   1  -9 2999.43  402.87
   4   1  -9 2977.68  454.85
  -4  -1   9 2902.84  546.35
   4   1  -8  185.00  155.31
   4   1  -8  154.23  272.85
  -4  -1   8  137.37  276.08
   4   1  -7  400.70  222.52
   4   1  -7  568.14  580.84
  -4  -1   7  405.81  317.55
   4   1  -6   57.46  187.45
   4   1  -6   43.60  118.52
  -4  -1   6   66.76  269.71
   4   1  -5  147.03  177.52
   4   1  -5  111.18  174.50
  -4  -1   5   38.22  252.33
   4   1  -4  467.23  213.18
   4   1  -4  501.66  333.86
  -4  -1   4  507.96  353.58
   4   1  -3   67.86  132.46
   4   1  -3   75.94  126.98
  -4  -1   3   14.81  164.24
   4   1  -2   12.52  126.41
   4   1  -2   33.43  130.95
  -4  -1   2  -33.56  150.48
   4   1  -1 3229.59  282.04
   4   1  -1 3635.09  283.32
  -4  -1   1 2868.14  391.81
   4   1   0 1462.87  225.24
   4   1   0 1604.95  199.46
  -4  -1   0 1261.40  280.28
   4   1   1  139.12  186.13
   4   1   1  127.76  112.67
  -4  -1  -1  143.56   62.28
  -4  -1  -1  149.94  204.71
   4   1   2 7476.81  555.26
   4   1   2 7023.88  519.18
  -4  -1  -2 7513.85  481.59
  -4  -1  -2 6758.44  560.34
   4   1   3 1016.69  189.28
   4   1   3 1097.34  115.71
  -4  -1  -3 1028.01   82.85
  -4  -1  -3 1080.99  276.05
   4   1   4 4250.14  283.55
  -4  -1  -4 4505.93  136.86
  -4  -1  -4 4698.40  152.13
  -4  -1  -4 4737.09  385.53
   4   1   5 7229.87  359.04
  -4  -1  -5 7355.69  431.41
   4   1   6 2998.49  289.62
  -4  -1  -6 2878.19  327.79
   4   1   7  983.43  231.16
  -4  -1  -7  856.31  216.01
   4   1   8 2932.77  305.73
  -4  -1  -8 2626.89  331.89
   4   1   9  651.19  173.57
  -4  -1  -9  625.35  206.86
   4   1  10   16.82  112.62
  -4  -1 -10   35.06  106.25
   4   1  11  699.73  184.05
  -4  -1 -11  646.79  412.81
   4   1  12  314.42  139.29
  -4  -1 -12  271.24  313.46
   4   1  13    9.52  142.38
  -4  -1 -13   22.09  123.95
   4   1  14  652.79  136.41
  -4  -1 -14  576.44  572.99
  -4  -1 -15   -2.61  107.15
   4   2 -12  358.06  435.18
  -4  -2  12  625.63  398.17
   4   2 -11   29.55   95.65
   4   2 -11   50.03  185.28
  -4  -2  11   40.14  210.80
   4   2 -10  852.83  283.46
   4   2 -10  859.17  787.34
  -4  -2  10  983.40  474.32
   4   2  -9   50.95  115.92
   4   2  -9  110.65  159.60
  -4  -2   9   65.53  255.13
   4   2  -8 1121.01  277.67
   4   2  -8 1156.35  758.05
  -4  -2   8  842.13  400.15
   4   2  -7   39.25  188.33
   4   2  -7   22.93   97.03
  -4  -2   7   93.75  337.79
   4   2  -6 9769.40  619.00
   4   2  -6 9888.76  952.75
  -4  -2   6 9264.90  778.03
   4   2  -5  272.05  201.26
   4   2  -5  321.17  359.37
  -4  -2   5  265.09  330.71
   4   2  -4 1352.56  237.41
   4   2  -4 1371.19  230.04
  -4  -2   4 1152.70  355.18
   4   2  -3  200.39  202.03
   4   2  -3  186.48  181.34
  -4  -2   3  142.90  282.59
   4   2  -2  627.02  257.86
   4   2  -2  731.43  406.42
  -4  -2   2  703.03  354.22
   4   2  -1  242.32  227.04
   4   2  -1  302.79  281.26
  -4  -2   1  182.93  266.59
   4   2   0   -1.52  129.82
   4   2   0   20.49   60.00
  -4  -2   0    4.85  138.54
   4   2   1  948.99  225.58
   4   2   1 1074.89  169.31
  -4  -2  -1  890.11  304.48
   4   2   2  896.10  177.63
   4   2   2  921.07  149.84
  -4  -2  -2 1054.94  105.37
  -4  -2  -2  735.02  268.59
   4   2   3 4817.19  304.30
  -4  -2  -3 5757.39  201.65
  -4  -2  -3 5188.81  203.81
  -4  -2  -3 4322.81  374.13
   4   2   4 2315.34  235.93
  -4  -2  -4 2468.55  101.76
  -4  -2  -4 2573.54  121.83
  -4  -2  -4 2169.95  345.21
   4   2   5 5203.35  370.22
  -4  -2  -5 4338.27  355.60
   4   2   616097.84  526.00
  -4  -2  -614716.91  516.05
   4   2   7   83.26  231.21
  -4  -2  -7   84.63  147.76
   4   2   8 4969.13  377.96
  -4  -2  -8 4648.51  434.44
   4   2   9 1835.39  222.92
  -4  -2  -9 1601.62  266.31
   4   2  10  240.63  170.82
  -4  -2 -10  187.85  244.10
   4   2  11   81.20  146.30
  -4  -2 -11   93.29  196.67
   4   2  12  992.00  214.74
  -4  -2 -12  901.82  469.24
   4   2  13 1730.88  223.72
  -4  -2 -13 1799.74  762.21
  -4  -2 -14  685.28  627.09
  -4  -2 -15  784.14  501.42
   4   3 -12   21.57  114.73
  -4  -3  12   60.82  181.35
   4   3 -11   24.76  103.34
   4   3 -11   76.14  136.87
  -4  -3  11   17.43  172.25
   4   3 -10   39.38  121.22
   4   3 -10   15.29   73.98
  -4  -3  10  -13.18  205.07
   4   3  -9  421.32  300.88
   4   3  -9  504.12  541.59
  -4  -3   9  316.42  371.62
   4   3  -8 1919.85  333.65
   4   3  -8 1797.35  746.15
  -4  -3   8 1689.65  434.41
   4   3  -7  530.77  287.45
   4   3  -7  499.05  491.21
  -4  -3   7  418.02  335.73
   4   3  -6  969.64  330.68
   4   3  -6 1004.49  680.88
  -4  -3   6  983.59  373.14
   4   3  -5  190.31  265.39
   4   3  -5  143.39  200.34
  -4  -3   5  101.36  316.93
   4   3  -4  487.13  215.46
   4   3  -4  546.33  502.71
  -4  -3   4  506.13  358.98
   4   3  -3 1310.07  287.36
   4   3  -3 1281.41  401.72
  -4  -3   3 1092.51  330.48
   4   3  -2   67.50  209.08
   4   3  -2   27.68  109.60
  -4  -3   2    0.07  158.60
   4   3  -1 2835.07  265.64
   4   3  -1 3450.01  263.39
  -4  -3   1 2917.45  419.66
   4   3   0   -0.91  134.02
   4   3   0    4.38   51.04
  -4  -3   0  -16.54  142.66
   4   3   1  196.13  128.74
  -4  -3  -1  255.98  269.95
   4   3   2 4608.30  501.52
  -4  -3  -2 3945.63  183.43
  -4  -3  -2 4615.74  463.88
   4   3   3 7722.62  371.79
  -4  -3  -3 7891.25  249.05
  -4  -3  -3 7699.88  269.37
  -4  -3  -3 6845.64  473.59
   4   3   4 1055.94  430.52
  -4  -3  -4 1019.41   74.26
  -4  -3  -4 1027.70  105.67
  -4  -3  -4  914.93  320.93
   4   3   5  686.00  202.63
  -4  -3  -5  609.79   39.39
  -4  -3  -5  580.51  305.33
   4   3   6 1071.35  216.94
  -4  -3  -6 1043.10  309.13
   4   3   7   46.34  140.75
  -4  -3  -7   72.56  225.40
   4   3   8 1084.99  214.56
  -4  -3  -8 1064.61  337.18
   4   3   9 6126.89  472.31
  -4  -3  -9 5297.92  494.04
   4   3  10 1871.92  283.46
  -4  -3 -10 1776.26  375.81
   4   3  11  211.34  130.07
  -4  -3 -11  228.36  303.49
   4   3  12   26.22  107.07
  -4  -3 -12    7.71   86.64
   4   3  13  115.02  153.93
  -4  -3 -13   13.34  162.61
  -4  -3 -14 3656.99  444.41
  -4  -3 -15  108.27  194.97
   4   4 -11  -29.93   97.53
   4   4 -11   21.11  108.45
  -4  -4  11   47.29  244.82
   4   4 -10   47.07  194.15
   4   4 -10   75.82  176.45
  -4  -4  10  -14.65  165.59
   4   4  -9  842.74  339.99
   4   4  -9  546.30  817.87
  -4  -4   9  780.74  503.29
   4   4  -8 1761.75  380.47
   4   4  -8 1586.42  375.47
  -4  -4   8 1596.60  528.23
   4   4  -7  221.28  231.32
   4   4  -7  152.05  233.14
  -4  -4   7  189.31  376.73
   4   4  -6 1088.50  324.79
   4   4  -6  859.31  740.42
  -4  -4   6  896.70  381.27
   4   4  -5  305.23  271.99
   4   4  -5  194.81  228.59
  -4  -4   5  170.69  259.63
   4   4  -4  125.18  254.54
   4   4  -4   84.81  118.31
  -4  -4   4   88.77  163.49
   4   4  -3 2872.56  360.35
   4   4  -3 2593.11  490.25
  -4  -4   3 2686.84  432.67
   4   4  -2 6921.06  535.21
   4   4  -2 6845.35  707.33
  -4  -4   2 6561.64  597.34
   4   4  -1  523.62  246.18
   4   4  -1  476.57  194.51
  -4  -4   1  504.54  301.98
   4   4   0 3988.59  322.12
  -4  -4   0 4651.08  298.15
  -4  -4   0 3633.76  402.08
   4   4   1  451.52  170.42
  -4  -4  -1  487.98  149.40
  -4  -4  -1  292.72  263.17
  -4  -4  -2 8625.47  332.85
  -4  -4  -2 6925.41  466.72
   4   4   326159.63  613.80
  -4  -4  -325291.28  337.24
  -4  -4  -323225.97  649.55
   4   4   4 5112.13  467.58
  -4  -4  -4 5368.75  330.06
  -4  -4  -4 5158.01  536.81
   4   4   521893.89  569.77
  -4  -4  -519682.85  218.41
  -4  -4  -519457.42  654.06
   4   4   6  247.28  190.58
  -4  -4  -6  344.45  336.99
   4   4   7 2751.43  307.86
  -4  -4  -7 2543.07  416.12
   4   4   8   -2.45  143.77
  -4  -4  -8   39.03  244.78
   4   4   9  141.05  236.34
  -4  -4  -9  154.23  287.47
   4   4  10 2019.44  298.72
  -4  -4 -10 1927.77  454.87
   4   4  11  216.77  259.07
  -4  -4 -11  281.49  316.05
   4   4  12   28.39  170.82
  -4  -4 -12   45.27  131.11
  -4  -4 -13 4799.06  703.10
  -4  -4 -14  303.56  492.95
  -4  -4 -15   28.86  143.94
   4   5 -10  323.04  248.93
  -4  -5  10  350.45  359.97
   4   5  -9  905.94  306.44
   4   5  -9  762.29  661.96
  -4  -5   9 1025.43  381.41
   4   5  -8  120.95  193.14
   4   5  -8   28.32   84.12
  -4  -5   8  188.58  359.68
   4   5  -7 2357.77  454.84
   4   5  -7 1969.14  539.78
  -4  -5   7 1808.78  542.50
   4   5  -6 1477.15  361.03
   4   5  -6 1316.84  277.70
  -4  -5   6 1259.41  453.76
   4   5  -5 6641.06  804.62
   4   5  -5 5841.26  686.74
  -4  -5   5 6298.42  854.20
   4   5  -4  206.84  222.92
   4   5  -4  259.50  203.40
  -4  -5   4  371.01  352.30
   4   5  -3 1069.00  355.40
  -4  -5   3 1159.82  381.91
   4   5  -2 2982.53  441.85
  -4  -5   2 2637.96  313.29
  -4  -5   2 2549.73  394.88
   4   5  -1 1950.78  342.94
  -4  -5   1 1731.55  228.00
  -4  -5   1 1769.12  356.84
   4   5   0  614.06  227.15
  -4  -5   0  568.79  190.58
  -4  -5   0  552.81  285.38
   4   5   115793.90  949.47
  -4  -5  -116155.95  898.25
  -4  -5  -114371.78  923.91
   4   5   2 9231.78  633.01
  -4  -5  -2 8943.02  538.20
  -4  -5  -2 8709.97  672.53
   4   5   3 2577.11  377.17
  -4  -5  -3 2546.60  230.77
  -4  -5  -3 2656.15  395.41
   4   5   4 4119.04  396.20
  -4  -5  -4 4224.64  289.47
  -4  -5  -4 4202.33  496.86
   4   5   5  183.05  200.42
  -4  -5  -5  180.30   96.04
  -4  -5  -5  239.60  277.23
   4   5   6 3812.67  358.67
  -4  -5  -6 3768.66  465.56
   4   5   7 1011.48  248.89
  -4  -5  -7  958.36  365.91
   4   5   8  954.60  249.54
  -4  -5  -8  946.11  367.20
   4   5   9 1490.90  258.18
  -4  -5  -9 1529.03  408.69
   4   5  10 1238.86  193.66
  -4  -5 -10 1319.25  370.54
   4   5  11 1031.23  224.78
  -4  -5 -11 1010.63  617.37
   4   5  12 1703.71  221.15
  -4  -5 -12 1802.46  485.66
  -4  -5 -13  236.65  328.74
  -4  -5 -14   -1.17  140.57
   4   6  -9  -23.62  125.92
  -4  -6   9    9.94  166.09
   4   6  -8  136.80  235.46
  -4  -6   8  113.13  279.50
   4   6  -7 1577.34  343.36
  -4  -6   7 1470.81  452.24
   4   6  -6  232.96  293.35
  -4  -6   6  194.07  231.85
  -4  -6   6  115.57  344.82
   4   6  -5  179.95  291.38
  -4  -6   5  181.04  261.07
  -4  -6   5  205.68  447.52
   4   6  -4 1005.83  388.78
  -4  -6   4  866.23  276.80
  -4  -6   4  824.61  443.45
   4   6  -3   11.14  206.30
  -4  -6   3  -33.36  114.35
  -4  -6   3    8.56  181.29
   4   6  -2  -19.18  207.11
  -4  -6   2   30.41  100.03
  -4  -6   2   -4.47  164.89
   4   6  -1 1265.24  327.80
  -4  -6   1 1229.44  249.40
  -4  -6   1 1098.26  324.55
   4   6   0  518.85  275.32
  -4  -6   0  432.32  187.29
  -4  -6   0  450.28  324.03
   4   6   1  725.72  275.19
  -4  -6  -1  607.83  176.79
  -4  -6  -1  667.97  270.71
   4   6   2 2861.49  392.00
  -4  -6  -2 2679.52  251.37
  -4  -6  -2 2784.64  377.42
   4   6   3 3156.24  373.95
  -4  -6  -3 3148.71  271.09
  -4  -6  -3 3130.34  388.30
   4   6   4  -22.01  189.03
  -4  -6  -4   20.61   78.53
  -4  -6  -4   37.88  205.76
   4   6   5 3238.25  403.29
  -4  -6  -5 2846.47  231.92
  -4  -6  -5 2941.85  443.32
   4   6   6  191.41  161.44
  -4  -6  -6  147.08  285.38
   4   6   7  523.22  219.43
  -4  -6  -7  610.99  361.67
   4   6   8    7.98  133.02
  -4  -6  -8  -30.88  146.71
   4   6   9  687.12  180.40
  -4  -6  -9  631.57  310.19
   4   6  10   58.57  150.13
  -4  -6 -10  124.99  236.01
   4   6  11  507.98  230.19
  -4  -6 -11  540.30  494.48
  -4  -6 -12  279.95  361.92
  -4  -6 -13  365.89  618.42
  -4  -6 -14   99.54  185.48
   4   7  -8   99.19  201.68
  -4  -7   8   77.82  224.69
  -4  -7   8  138.96  314.53
   4   7  -7  716.29  290.01
  -4  -7   7  650.96  267.47
  -4  -7   7  778.71  381.36
   4   7  -6 3568.48  455.80
  -4  -7   6 3508.57  438.23
  -4  -7   6 3386.99  475.65
   4   7  -5   39.40  185.24
  -4  -7   5   42.77  187.44
  -4  -7   5   99.07  291.54
   4   7  -4 1139.81  377.67
  -4  -7   4 1005.52  304.14
  -4  -7   4  903.40  357.50
   4   7  -3   12.05  186.46
  -4  -7   3   13.86  114.32
  -4  -7   3   -7.08  196.04
   4   7  -2  126.33  269.77
  -4  -7   2  120.89  182.63
  -4  -7   2   99.91  344.18
   4   7  -1  -17.30  195.92
  -4  -7   1   17.38  100.32
  -4  -7   1    4.37  191.53
   4   7   0 1715.00  425.75
  -4  -7   0 1352.52  272.38
  -4  -7   0 1402.46  384.59
   4   7   1   49.95  183.27
  -4  -7  -1   -9.59   88.03
  -4  -7  -1   91.68  312.92
   4   7   2  177.46  275.14
  -4  -7  -2   47.62  127.21
  -4  -7  -2  169.30  300.17
   4   7   3  282.35  325.39
  -4  -7  -3  251.32  174.30
  -4  -7  -3  269.65  311.07
   4   7   4 1391.89  423.79
  -4  -7  -4 1141.91  194.83
  -4  -7  -4 1261.64  372.82
   4   7   5    3.76  154.32
  -4  -7  -5    1.49   53.07
  -4  -7  -5   36.55  152.03
   4   7   6  120.45  227.95
  -4  -7  -6   86.42  223.68
   4   7   7   87.46  233.86
  -4  -7  -7  -11.79  149.62
   4   7   8   11.17  142.18
  -4  -7  -8  -17.19  140.23
   4   7   9  267.21  191.55
  -4  -7  -9  330.17  293.12
   4   7  10  181.72  163.30
  -4  -7 -10  254.93  234.11
   4   7  11 1002.94  246.56
  -4  -7 -11  941.34  405.38
  -4  -7 -12   84.21  228.57
  -4  -7 -13   78.47  172.05
   4   8  -7  281.89  294.44
  -4  -8   7  187.91  283.72
  -4  -8   7   63.73  230.01
   4   8  -6  204.63  223.11
  -4  -8   6   96.21  250.63
  -4  -8   6  256.82  341.17
   4   8  -5   92.64  281.30
  -4  -8   5   16.03  151.54
  -4  -8   5   28.37  151.07
   4   8  -4   91.08  167.59
  -4  -8   4  146.99  264.88
  -4  -8   4  217.17  302.41
   4   8  -3  -14.59  184.11
  -4  -8   3   40.36  132.74
  -4  -8   3   63.41  134.43
   4   8  -2   46.69  202.61
  -4  -8   2  103.30  209.03
  -4  -8   2  122.68  238.56
   4   8  -1 1524.87  429.39
  -4  -8   1 1227.93  298.76
  -4  -8   1 1289.83  402.18
   4   8   0   -5.82  208.35
  -4  -8   0   26.96  142.42
  -4  -8   0  -15.66  160.68
   4   8   1 1499.69  536.31
  -4  -8  -1 1177.56  256.57
  -4  -8  -1 1210.05  408.52
   4   8   2 4346.50  659.39
  -4  -8  -2 4102.92  444.55
  -4  -8  -2 4110.13  630.62
   4   8   3  362.74  326.74
  -4  -8  -3  305.23  194.51
  -4  -8  -3  421.54  390.77
   4   8   4   97.17  234.25
  -4  -8  -4   81.05  138.17
  -4  -8  -4  113.51  274.58
   4   8   5   91.53  233.27
  -4  -8  -5   32.67  105.01
  -4  -8  -5   33.68  194.26
   4   8   6  354.89  284.46
  -4  -8  -6  229.33  275.82
   4   8   7 2133.37  347.46
  -4  -8  -7 2223.37  426.34
   4   8   8  176.58  179.54
  -4  -8  -8  289.83  389.66
   4   8   9  299.90  253.68
  -4  -8  -9  260.83  343.22
   4   8  10 1871.99  273.62
  -4  -8 -10 2002.90  377.35
   4   8  11   67.95  121.85
  -4  -8 -11   28.55  100.84
  -4  -8 -12 2497.25  669.86
   4   9  -5   31.84  186.60
  -4  -9   5   37.14  139.50
  -4  -9   5  -10.56  146.47
   4   9  -4   55.33  175.00
  -4  -9   4  115.29  229.50
  -4  -9   4   71.01  216.40
   4   9  -3  608.03  326.00
  -4  -9   3  619.41  255.70
  -4  -9   3  526.31  304.80
   4   9  -2 2338.80  377.92
  -4  -9   2 2370.95  360.19
  -4  -9   2 2116.16  345.24
   4   9  -1  160.32  227.66
  -4  -9   1  323.68  231.16
  -4  -9   1  343.54  254.59
   4   9   0 1657.67  451.77
  -4  -9   0 1543.74  284.64
  -4  -9   0 1677.61  377.69
   4   9   1  353.76  384.76
  -4  -9  -1  286.15  225.78
  -4  -9  -1  344.09  301.34
   4   9   2   94.46  275.19
  -4  -9  -2   32.51  157.51
  -4  -9  -2   71.17  263.30
   4   9   3 2935.53  424.69
  -4  -9  -3 2658.90  288.19
  -4  -9  -3 2858.75  422.83
   4   9   4   15.20  159.67
  -4  -9  -4   -2.08   68.72
   4   9   5  790.92  342.08
  -4  -9  -5  709.70  323.60
   4   9   6  544.77  254.68
  -4  -9  -6  542.63  297.09
   4   9   7  196.47  203.56
  -4  -9  -7  341.15  339.12
   4   9   8   46.96  216.64
  -4  -9  -8   35.46  144.98
   4   9   9   57.46  211.55
  -4  -9  -9   52.59  218.17
   4   9  10   81.58  144.57
  -4  -9 -10  101.12  255.76
   4  10  -2   81.21  235.82
  -4 -10   2   -9.33  109.44
  -4 -10   2   25.90  137.93
   4  10  -1  100.61  166.39
  -4 -10   1  171.33  197.19
  -4 -10   1  145.77  241.14
   4  10   0  102.06  249.13
  -4 -10   0   -0.34  111.28
  -4 -10   0   27.91  218.38
   4  10   1   99.71  253.88
  -4 -10  -1  381.20  266.15
   4  10   2 2714.53  426.24
  -4 -10  -2 2691.20  353.95
  -4 -10  -2 2690.64  448.27
   4  10   3  293.72  286.32
  -4 -10  -3  131.62  123.65
  -4 -10  -3  171.42  268.26
   4  10   4   27.21  173.71
  -4 -10  -4   75.86  127.12
  -4 -10  -4   49.03  204.16
   4  10   5   37.15  152.30
  -4 -10  -5   32.89  187.74
   4  10   6   30.65  147.49
  -4 -10  -6   -5.28  139.35
   4  10   7   14.42  159.29
  -4 -10  -7   97.45  265.06
   5  -8  -4   33.04  125.24
   5  -8  -4   31.68  171.16
   5  -8  -3 2261.48  482.17
   5  -8  -3 2214.60  382.75
   5  -8  -2   18.69  148.34
   5  -8  -2   61.77  182.16
   5  -8  -1   62.72  150.31
   5  -8  -1   91.07  222.59
   5  -8   0  413.65  202.94
   5  -8   0  384.31  222.85
   5  -8   1  209.50  189.03
   5  -8   1  210.45  211.16
   5  -8   2   44.62  144.94
   5  -8   2   66.25  159.77
   5  -8   3 2773.47  397.75
   5  -8   3 2461.67  317.93
   5  -8   4 1274.69  305.60
   5  -8   5  441.82  251.68
   5  -7  -6   53.68  174.47
   5  -7  -6   23.62  114.28
   5  -7  -5   65.63  161.59
   5  -7  -5   -4.91  109.57
   5  -7  -4  701.81  202.50
   5  -7  -4  729.55  238.19
   5  -7  -3 1217.05  268.51
   5  -7  -3 1170.28  259.85
   5  -7  -2 4658.93  429.33
   5  -7  -2 4234.37  415.58
   5  -7  -1  339.89  273.37
   5  -7  -1  402.45  193.14
   5  -7   0   75.16  214.35
   5  -7   0   75.04  203.01
   5  -7   1  182.89  239.36
   5  -7   1  122.19  178.17
   5  -7   2   34.78  153.37
   5  -7   2   76.11  143.91
   5  -7   3  327.36  205.04
   5  -7   3  206.46  149.40
   5  -7   4  107.10  129.60
   5  -7   5    2.00  160.89
   5  -7   6   72.11  224.92
   5  -7   7 1263.39  303.16
   5  -7   8   75.38  226.87
   5  -6  -7  193.92  172.54
   5  -6  -7  226.70  201.45
  -5   6   7  121.83  204.26
   5  -6  -6   83.07  207.90
   5  -6  -6  108.86  154.74
  -5   6   6    5.67   95.39
   5  -6  -5 1818.31  223.72
   5  -6  -5 1792.77  282.14
  -5   6   5 1476.80  277.61
   5  -6  -4 1068.83  258.90
   5  -6  -4 1057.48  278.97
  -5   6   4  879.53  218.85
   5  -6  -3 1005.10  269.57
   5  -6  -3 1049.32  273.74
   5  -6  -2  105.91  202.68
   5  -6  -2   12.49  103.43
   5  -6  -1   40.28  225.08
   5  -6  -1   12.03  100.85
   5  -6   0   12.74  169.30
   5  -6   0   69.83  145.78
   5  -6   1  758.87  256.36
   5  -6   1  662.28  192.37
   5  -6   2   96.40  225.33
   5  -6   2   79.55  150.17
   5  -6   3   67.41  242.69
   5  -6   3   55.69   90.45
   5  -6   4  734.75  257.45
   5  -6   5 2310.31  355.49
   5  -6   6   96.77  196.97
   5  -6   7  420.49  255.97
   5  -6   8    7.39  149.29
   5  -6   9 2975.46  504.74
   5  -5  -8   23.79   92.05
   5  -5  -8   -9.01  128.49
  -5   5   8   12.95  170.24
   5  -5  -7  561.92  192.20
   5  -5  -7  503.03  237.05
  -5   5   7  490.11  257.39
   5  -5  -6   38.89  165.19
   5  -5  -6   62.69  209.41
  -5   5   6  137.31  160.06
   5  -5  -5   77.22  177.83
   5  -5  -5   74.03  168.37
  -5   5   5   72.04  200.66
   5  -5  -4  240.12  201.32
   5  -5  -4  218.46  168.77
  -5   5   4  204.46  174.53
   5  -5  -3 1118.23  261.28
   5  -5  -3 1098.22  272.37
  -5   5   3  960.52  281.10
   5  -5  -2  227.83  228.08
   5  -5  -2  168.42  205.40
  -5   5   2  171.56  173.63
   5  -5  -1 3001.04  367.69
   5  -5  -1 3139.30  366.85
  -5   5   1 2751.94  350.25
   5  -5   0 3102.10  428.82
   5  -5   0 2994.92  374.09
  -5   5   0 2364.94  291.65
   5  -5   1  235.69  253.34
   5  -5   1  180.83  138.08
   5  -5   2  549.10  335.43
   5  -5   2  586.72  197.24
   5  -5   3 1854.00  345.04
   5  -5   3 1596.81  254.53
   5  -5   4 7647.68  729.95
   5  -5   5   -6.21  175.92
   5  -5   6 2702.02  432.04
   5  -5   7  148.91  241.72
   5  -5   8 2837.20  383.63
   5  -5   9   93.10  200.67
   5  -5  10 3048.96  438.58
   5  -4  -9  239.10  215.41
  -5   4   9  250.72  297.18
   5  -4  -8   43.81  127.32
   5  -4  -8   69.99  198.50
  -5   4   8   24.97  199.57
   5  -4  -7   57.91  147.60
   5  -4  -7   85.19  223.68
  -5   4   7   87.93  248.27
   5  -4  -6    8.44  129.25
   5  -4  -6   80.58  257.31
  -5   4   6   24.58  141.17
   5  -4  -5   37.95  179.57
   5  -4  -5   69.40  177.94
  -5   4   5   33.23  195.93
   5  -4  -4  356.60  168.77
   5  -4  -4  389.07  208.12
  -5   4   4  434.00  297.02
   5  -4  -3   65.23  185.36
   5  -4  -3   59.16  176.43
  -5   4   3   57.51  192.12
   5  -4  -2  -13.11  156.39
   5  -4  -2    9.49   86.74
  -5   4   2   39.54  173.40
   5  -4  -1   74.68  242.52
   5  -4  -1   33.59  118.68
  -5   4   1   97.62  204.06
   5  -4   0  591.20  263.55
   5  -4   0  535.89  181.61
  -5   4   0  487.33  206.94
   5  -4   1   22.28  187.67
   5  -4   1   27.29  101.72
  -5   4  -1   52.54  147.88
   5  -4   2  495.19  247.03
   5  -4   2  528.53  184.12
  -5   4  -2  398.62  132.92
   5  -4   3  497.42  244.51
   5  -4   3  493.59  153.30
  -5   4  -3  387.75  140.65
   5  -4   4 1506.16  313.22
   5  -4   510071.17  477.79
   5  -4   6 3429.25  429.13
   5  -4   7   60.17  205.36
   5  -4   8  314.08  233.83
   5  -4   9  201.96  162.95
   5  -4  10  214.26  204.89
   5  -4  11 2509.63  495.58
   5  -3  -9   78.21  202.66
  -5   3   9  122.77  308.77
   5  -3  -8   88.98  139.80
   5  -3  -8   24.39  146.37
  -5   3   8   42.85  162.08
   5  -3  -7  100.13  201.80
   5  -3  -7   84.29  191.14
  -5   3   7   29.13  218.51
   5  -3  -6  116.29  205.76
   5  -3  -6   50.03  132.48
  -5   3   6   52.98  140.66
   5  -3  -5   89.20  152.59
   5  -3  -5   71.06  167.23
  -5   3   5   48.10  128.34
   5  -3  -4  965.79  249.97
   5  -3  -4  868.93  228.79
  -5   3   4  831.27  281.20
   5  -3  -3  394.85  193.74
   5  -3  -3  419.63  207.83
  -5   3   3  358.31  205.02
   5  -3  -2 1952.23  348.66
   5  -3  -2 2117.17  313.79
  -5   3   2 1740.29  347.52
   5  -3  -1 1921.93  362.24
   5  -3  -1 1813.32  258.28
  -5   3   1 1691.12  321.40
   5  -3   0 4699.81  564.91
   5  -3   0 4525.98  491.31
  -5   3   0 4553.93  569.68
   5  -3   1  514.80  260.46
   5  -3   1  463.92  169.82
  -5   3  -1  468.90  180.88
   5  -3   2  549.79  256.17
   5  -3   2  475.10  126.52
  -5   3  -2  518.50  217.84
   5  -3   3 4941.96  565.74
   5  -3   3 4309.84  443.93
  -5   3  -3 4248.54  488.19
   5  -3   4 2894.77  394.01
  -5   3  -4 2547.50  335.09
   5  -3   5   46.19  164.68
  -5   3  -5   55.09  132.02
   5  -3   6  283.01  248.86
  -5   3  -6  235.41  133.92
   5  -3   7 1412.62  335.63
  -5   3  -7 1076.99  180.55
   5  -3   8  773.36  276.26
   5  -3   9  722.52  248.05
   5  -3  10   37.89  139.52
   5  -3  11   47.09  126.04
   5  -3  12  631.77  219.61
   5  -2 -10   30.12   97.37
  -5   2  10    5.29  186.12
   5  -2  -9   47.18  123.34
   5  -2  -9   56.45  176.09
  -5   2   9   40.20  160.19
   5  -2  -8 1284.56  225.42
   5  -2  -8 1304.75  798.02
  -5   2   8 1241.28  416.84
   5  -2  -7  291.26  183.23
   5  -2  -7  296.44  325.57
  -5   2   7  234.38  278.97
   5  -2  -6  388.98  200.98
   5  -2  -6  410.88  418.81
  -5   2   6  389.36  277.06
   5  -2  -5  321.39  215.89
   5  -2  -5  258.26  185.34
  -5   2   5  264.97  280.84
   5  -2  -4 1480.34  274.22
   5  -2  -4 1530.21  297.21
  -5   2   4 1414.41  381.04
   5  -2  -3 1560.52  331.69
   5  -2  -3 1559.88  283.03
  -5   2   3 1308.86  345.81
   5  -2  -2 9437.17  990.52
   5  -2  -2 9410.53  942.06
  -5   2   2 7883.54  861.10
   5  -2  -1 1197.59  299.33
   5  -2  -1 1117.30  212.79
  -5   2   1 1014.19  281.78
   5  -2   0 1495.95  284.38
   5  -2   0 1414.47  228.54
  -5   2   0 1393.63  329.06
   5  -2   1   96.20  305.50
   5  -2   1   31.32  100.53
  -5   2  -1   65.23  190.02
   5  -2   2 1620.74  279.27
   5  -2   2 1644.11  190.58
  -5   2  -2 1533.14  283.39
   5  -2   3  181.36  219.14
   5  -2   3  166.05   97.58
  -5   2  -3  204.86  166.27
   5  -2   4   55.69  141.07
  -5   2  -4   31.32   96.16
   5  -2   5   28.75  157.02
  -5   2  -5   94.15  200.78
   5  -2   6  556.35  246.75
  -5   2  -6  500.30  207.85
   5  -2   7 7965.81  908.61
  -5   2  -7 7056.97  763.72
   5  -2   8 1360.04  301.41
  -5   2  -8 1233.66  214.70
   5  -2   9 1042.18  278.85
  -5   2  -9 1003.79  268.24
   5  -2  10  816.46  231.54
   5  -2  11   33.31  117.27
   5  -2  12  107.47  189.61
   5  -2  13  116.56  206.11
   5  -1 -10   99.39  175.27
  -5   1  10   88.52  276.63
   5  -1  -9 1326.82  259.71
   5  -1  -9 1284.84  653.99
  -5   1   9 1249.57  371.24
   5  -1  -8  928.55  202.71
   5  -1  -8  993.62  761.96
  -5   1   8 1066.89  424.84
   5  -1  -7 1484.43  249.79
   5  -1  -7 1577.74  289.87
  -5   1   7 1371.12  421.33
   5  -1  -6   45.37  164.26
   5  -1  -6   39.03  129.35
  -5   1   6   16.92  166.72
   5  -1  -5   82.70  175.78
   5  -1  -5    1.52  111.47
  -5   1   5  139.75  290.82
   5  -1  -4  696.23  234.91
   5  -1  -4  772.44  565.34
  -5   1   4  615.78  305.99
   5  -1  -3    6.83  150.72
   5  -1  -3   25.03   69.16
  -5   1   3   12.72  169.30
   5  -1  -2 3023.84  425.40
   5  -1  -2 2880.63  386.24
  -5   1   2 2586.90  497.62
   5  -1  -1   69.34  236.60
   5  -1  -1   15.60   68.45
  -5   1   1   54.82  205.95
   5  -1   0    2.30  252.92
   5  -1   0   31.45   73.18
  -5   1   0   34.11  150.86
   5  -1   1 1005.54  309.69
   5  -1   1 1021.41  426.75
  -5   1  -1  753.01  234.16
   5  -1   2   90.91  227.97
   5  -1   2   30.55   53.85
  -5   1  -2   21.47  128.88
   5  -1   3  265.93  226.26
   5  -1   3  159.02  180.75
  -5   1  -3  167.78  157.60
   5  -1   4 3856.29  340.03
  -5   1  -4 3347.61  333.67
   5  -1   5  564.87  227.83
  -5   1  -5  600.63  214.24
   5  -1   6 8242.85  871.76
  -5   1  -6 7385.62  754.24
   5  -1   7  502.29  257.24
  -5   1  -7  495.40  203.53
   5  -1   8 1223.43  255.06
  -5   1  -8 1223.27  260.01
   5  -1   9  597.92  191.54
  -5   1  -9  668.91  201.86
   5  -1  10  484.44  177.59
  -5   1 -10  348.48  503.01
   5  -1  11  287.88  157.68
  -5   1 -11  159.15  272.10
   5  -1  12   39.28  169.48
  -5   1 -12   17.97   46.29
   5  -1  13 5050.55  666.70
   5   0 -10   40.43  138.97
   5   0 -10   72.71  144.81
  -5   0  10   87.53  335.60
   5   0  -9   80.84  134.38
   5   0  -9   53.99  138.95
  -5   0   9  148.91  315.50
   5   0  -8 2096.76  287.64
   5   0  -8 1957.83  602.13
  -5   0   8 2037.07  469.69
   5   0  -7    1.10  142.02
   5   0  -7   -0.19  129.29
  -5   0   7  -16.79  167.47
   5   0  -6   79.69  139.59
   5   0  -6   86.05  108.13
  -5   0   6    5.93  189.84
   5   0  -5  336.06  229.14
   5   0  -5  305.94  298.87
  -5   0   5  274.02  333.55
   5   0  -4 1636.13  361.88
   5   0  -4 1461.64  362.96
  -5   0   4 1227.05  445.26
   5   0  -3 2012.25  349.18
   5   0  -3 1934.21  311.91
  -5   0   3 1728.48  413.86
   5   0  -2  102.84  247.18
   5   0  -2   61.91   84.77
  -5   0   2   29.77  180.50
   5   0  -1 5415.81  512.10
   5   0  -1 4599.79  371.83
  -5   0   1 4503.82  559.90
   5   0   0 2288.11  367.59
   5   0   0 1900.32  251.15
  -5   0   0 1810.46  377.66
   5   0   1  418.96  237.31
   5   0   1  355.12  301.38
  -5   0  -1  357.76  272.35
   5   0   2  176.97  176.08
   5   0   2  132.94  153.78
  -5   0  -2  124.66  199.64
   5   0   3  -26.66  148.33
  -5   0  -3   53.48  202.36
   5   0   4 6344.95  530.46
  -5   0  -4 5399.49  486.55
   5   0   5   18.08  169.49
  -5   0  -5    1.82  118.44
   5   0   6  -30.23  175.02
  -5   0  -6   33.15  120.04
   5   0   7 2478.08  371.20
  -5   0  -7 2223.11  335.94
   5   0   8 2136.76  340.54
  -5   0  -8 1916.82  327.08
   5   0   9   33.74  126.96
  -5   0  -9   40.86  180.89
   5   0  10 1244.90  273.88
  -5   0 -10 1085.22  282.47
   5   0  11   70.67  153.42
  -5   0 -11   98.68  171.37
   5   0  12   98.25  182.77
  -5   0 -12   70.63  183.74
   5   0  13  125.45  198.42
  -5   0 -13   51.23  115.62
   5   1 -10 2758.05  445.54
   5   1 -10 2696.13  552.74
  -5  -1  10 2707.99  593.70
   5   1  -9   42.57  106.12
   5   1  -9   -0.66  138.07
  -5  -1   9   16.83  163.53
   5   1  -8 2289.09  303.45
   5   1  -8 2350.16  434.99
  -5  -1   8 2160.04  398.42
   5   1  -7  139.59  216.70
   5   1  -7  160.53  171.38
  -5  -1   7  161.41  312.22
   5   1  -6 3594.41  517.01
   5   1  -6 3293.30  492.39
  -5  -1   6 3186.43  635.95
   5   1  -5 1218.73  295.33
   5   1  -5 1142.46  280.33
  -5  -1   5  936.86  382.27
   5   1  -4 3841.79  510.44
   5   1  -4 3529.16  490.74
  -5  -1   4 3352.88  634.85
   5   1  -3 1058.50  333.43
   5   1  -3  888.17  440.47
  -5  -1   3  837.99  386.27
   5   1  -2  538.08  306.95
   5   1  -2  453.97  423.95
  -5  -1   2  480.62  373.17
   5   1  -1  247.38  306.55
   5   1  -1  271.37  238.55
  -5  -1   1  208.24  357.24
   5   1   0 1645.55  315.62
   5   1   0 1548.87  353.37
  -5  -1   0 1295.28  374.38
   5   1   1  333.82  280.38
   5   1   1  237.43  231.12
  -5  -1  -1  132.50  240.03
   5   1   2 1504.52  285.05
   5   1   2 1196.47  143.90
  -5  -1  -2 1147.91  274.49
   5   1   3 3516.63  359.83
  -5  -1  -3 3118.22  440.49
   5   1   4 4036.62  430.63
  -5  -1  -4 3518.37  427.45
   5   1   5  332.19  289.21
  -5  -1  -5  333.17  257.97
   5   1   6 9864.99  455.12
  -5  -1  -6 9512.18  980.54
   5   1   7  402.20  240.72
  -5  -1  -7  380.33  257.45
   5   1   8  513.76  232.76
  -5  -1  -8  577.46  230.86
   5   1   9   80.73  209.96
  -5  -1  -9   55.54  177.13
   5   1  10  216.64  211.10
  -5  -1 -10  227.71  237.68
   5   1  11  269.22  157.02
  -5  -1 -11  186.51  350.50
   5   1  12 1834.74  277.95
  -5  -1 -12 1762.75  386.91
   5   1  13  215.06  152.19
  -5  -1 -13  118.56  253.29
   5   2  -9   63.20  159.64
   5   2  -9   59.17  106.23
  -5  -2   9  112.94  270.06
   5   2  -8  606.80  287.29
   5   2  -8  385.01  538.12
  -5  -2   8  555.26  399.45
   5   2  -7 2686.56  360.65
   5   2  -7 2614.91  617.46
  -5  -2   7 2712.43  465.77
   5   2  -6 1625.74  291.37
   5   2  -6 1359.62  386.54
  -5  -2   6 1291.14  375.91
   5   2  -5  389.79  232.52
   5   2  -5  380.12  373.32
  -5  -2   5  350.76  347.70
   5   2  -4 1134.84  288.41
   5   2  -4 1079.88  422.37
  -5  -2   4 1007.79  426.53
   5   2  -3 1099.21  327.70
   5   2  -3 1072.16  334.34
  -5  -2   3 1075.00  450.50
   5   2  -2 5182.28  645.03
   5   2  -2 4688.53  507.96
  -5  -2   2 4606.77  730.74
   5   2  -1 2634.36  432.78
   5   2  -1 2369.89  440.67
  -5  -2   1 2265.18  542.38
   5   2   0  419.10  279.42
   5   2   0  216.74  322.86
  -5  -2   0  343.36  322.42
   5   2   1 7390.76  608.93
   5   2   1 6393.00  420.14
  -5  -2  -1 6389.88  675.81
   5   2   2  448.44  252.66
   5   2   2  207.24  271.53
  -5  -2  -2  431.39  291.39
   5   2   3 3220.85  410.45
  -5  -2  -3 2895.67  446.42
   5   2   4 2455.11  339.56
  -5  -2  -4 2154.30  428.30
   5   2   5 7737.48  837.45
  -5  -2  -5 6793.08  778.34
   5   2   6 3032.19  429.59
  -5  -2  -6 2662.30  420.19
   5   2   7  529.73  244.32
  -5  -2  -7  512.92  239.23
   5   2   8  189.67  213.69
  -5  -2  -8  173.91  234.31
   5   2   9  216.54  204.37
  -5  -2  -9   83.12  164.02
   5   2  10   31.34  151.86
  -5  -2 -10   25.58  163.23
   5   2  11 2317.13  268.18
  -5  -2 -11 2070.96  489.14
   5   2  12 1122.77  248.22
  -5  -2 -12 1056.89  457.24
   5   2  13  196.93  180.71
  -5  -2 -13  159.30  325.16
   5   3  -9  320.84  248.42
   5   3  -9  249.78  346.89
  -5  -3   9  136.28  330.65
   5   3  -8  154.65  182.14
   5   3  -8   87.04  122.71
  -5  -3   8  121.74  266.14
   5   3  -7 1521.57  298.07
   5   3  -7 1512.55  447.12
  -5  -3   7 1463.51  408.29
   5   3  -6 1132.13  280.95
   5   3  -6 1115.26  713.32
  -5  -3   6  947.55  354.12
   5   3  -5 4540.66  656.95
   5   3  -5 4468.07  827.79
  -5  -3   5 4428.76  685.21
   5   3  -4  509.66  239.34
   5   3  -4  332.74  393.51
  -5  -3   4  472.24  354.06
   5   3  -3  899.44  332.83
   5   3  -3  804.39  396.58
  -5  -3   3  892.37  376.58
   5   3  -2  771.75  298.69
   5   3  -2  727.31  350.37
  -5  -3   2  824.38  366.66
   5   3  -1 8074.12  861.44
   5   3  -1 7458.91  762.84
  -5  -3   1 7552.99  971.54
   5   3   016516.99  589.80
   5   3   014424.16  400.75
  -5  -3   014541.10  760.22
   5   3   1  229.63  204.82
  -5  -3  -1  289.18  341.63
   5   3   2 8699.54  934.70
  -5  -3  -2 7238.73  702.05
  -5  -3  -2 7344.65  916.29
   5   3   3 1676.82  325.63
  -5  -3  -3 1489.74  462.64
   5   3   4  671.73  300.03
  -5  -3  -4  674.46  389.34
   5   3   5 3472.53  476.31
  -5  -3  -5 3127.08  511.72
   5   3   6   60.17  255.21
  -5  -3  -6   11.46  162.42
   5   3   7  249.85  214.75
  -5  -3  -7  263.98  265.16
   5   3   8 3997.35  461.82
  -5  -3  -8 3484.27  450.11
   5   3   9  470.52  241.47
  -5  -3  -9  412.42  266.02
   5   3  10  306.64  149.08
  -5  -3 -10  205.20  193.93
   5   3  11  261.64  172.49
  -5  -3 -11  266.77  250.24
   5   3  12   54.32  203.54
  -5  -3 -12   -0.24  111.13
   5   3  13    0.44   91.14
  -5  -3 -13   49.42  161.42
   5   4  -8  903.13  325.66
   5   4  -8  744.35  428.77
  -5  -4   8  800.36  404.44
   5   4  -7   95.67  218.96
   5   4  -7   64.57  114.21
  -5  -4   7  119.21  356.13
   5   4  -6  371.73  271.15
   5   4  -6  212.80  255.74
  -5  -4   6  409.69  394.01
   5   4  -5 1314.24  312.01
   5   4  -5 1006.33  488.58
  -5  -4   5 1111.53  394.82
   5   4  -4  723.36  295.18
   5   4  -4  489.32  445.11
  -5  -4   4  595.35  363.67
   5   4  -3 1513.04  421.50
   5   4  -3 1311.63  424.18
  -5  -4   3 1524.23  421.19
   5   4  -2  414.27  277.90
   5   4  -2  385.15  190.74
  -5  -4   2  466.29  387.54
   5   4  -1   76.59  256.46
  -5  -4   1   95.24  242.61
   5   4   0 4782.03  617.92
  -5  -4   0 4447.07  519.10
  -5  -4   0 4328.00  655.47
   5   4   1  499.44  264.72
  -5  -4  -1  334.87  146.66
  -5  -4  -1  478.36  368.67
   5   4   2  167.20  238.47
  -5  -4  -2  107.18  103.08
  -5  -4  -2  143.57  323.14
   5   4   3   24.03  166.88
  -5  -4  -3   32.26  275.40
   5   4   4   40.81  183.21
  -5  -4  -4   56.73  269.86
   5   4   5  149.98  275.19
  -5  -4  -5  192.70  308.54
   5   4   6 7479.00  778.36
  -5  -4  -6 6965.97  721.18
   5   4   7 1393.60  278.47
  -5  -4  -7 1302.34  370.33
   5   4   8  318.82  178.53
  -5  -4  -8  221.33  222.02
   5   4   9  131.87  217.75
  -5  -4  -9  193.31  246.95
   5   4  10  563.14  181.02
  -5  -4 -10  587.21  255.07
   5   4  11  911.91  370.94
  -5  -4 -11  738.51  233.05
   5   4  12 1024.39  235.62
  -5  -4 -12  798.87  665.92
   5   5  -7  370.20  309.46
  -5  -5   7  280.39  281.40
   5   5  -6   87.38  223.20
   5   5  -6  129.46  214.80
  -5  -5   6   45.39  282.47
   5   5  -5   34.90  165.97
   5   5  -5    4.86  101.66
  -5  -5   5   10.44  204.21
   5   5  -4  426.39  276.84
  -5  -5   4  298.59  378.53
   5   5  -3   16.02  177.34
  -5  -5   3   22.88  113.36
  -5  -5   3   94.08  310.67
   5   5  -2   97.19  178.07
  -5  -5   2  112.14  199.58
  -5  -5   2  156.64  285.18
   5   5  -1 1725.06  317.16
  -5  -5   1 1569.60  266.54
  -5  -5   1 1455.29  388.54
   5   5   0  176.83  209.44
  -5  -5   0   90.55  137.57
  -5  -5   0  252.95  312.17
   5   5   1 2800.61  432.46
  -5  -5  -1 2469.97  292.43
  -5  -5  -1 2409.33  425.49
   5   5   2 3960.62  467.27
  -5  -5  -2 3940.87  498.71
   5   5   3  617.09  309.29
  -5  -5  -3  662.50  389.03
   5   5   4  193.98  283.21
  -5  -5  -4  219.35  296.74
   5   5   5  212.15  218.27
  -5  -5  -5  176.20  279.22
   5   5   6  453.65  230.81
  -5  -5  -6  385.60  266.09
   5   5   7 1426.04  327.87
  -5  -5  -7 1329.49  398.14
   5   5   8 2105.65  367.01
  -5  -5  -8 2014.15  360.39
   5   5   9  163.25  236.64
  -5  -5  -9  178.23  234.51
   5   5  10   37.97  171.40
  -5  -5 -10   -2.88  119.25
   5   5  11 1062.17  317.47
  -5  -5 -11 1043.77  313.66
   5   5  12  454.90  176.45
  -5  -5 -12  260.25  498.64
   5   6  -6  295.07  386.05
  -5  -6   6  195.41  257.12
  -5  -6   6  323.81  398.18
   5   6  -5  -71.22  188.37
  -5  -6   5   74.00  200.68
  -5  -6   5    3.00  172.91
  -5  -6   4  229.68  202.58
  -5  -6   4  131.57  313.57
   5   6  -3   69.27  245.94
  -5  -6   3   50.19  133.94
  -5  -6   3   16.04  194.86
   5   6  -2 2683.05  371.74
  -5  -6   2 2282.48  299.20
  -5  -6   2 2271.50  513.63
   5   6  -1  187.83  262.20
  -5  -6   1   53.97   93.70
  -5  -6   1   56.86  360.25
   5   6   0   42.23  200.32
  -5  -6   0   56.96  112.77
  -5  -6   0   36.09  248.64
   5   6   1 1789.28  411.23
  -5  -6  -1 1422.16  258.61
  -5  -6  -1 1346.17  415.12
   5   6   2 1483.87  471.05
  -5  -6  -2 1422.29  395.79
   5   6   3 1067.89  372.81
  -5  -6  -3 1256.43  369.23
   5   6   4   97.63  255.96
  -5  -6  -4   75.07  215.31
   5   6   5 1141.20  288.26
  -5  -6  -5 1216.98  339.13
   5   6   6   30.55  138.82
  -5  -6  -6   42.93  238.70
   5   6   7  112.52  145.18
  -5  -6  -7   79.48  143.68
   5   6   8 3896.66  366.71
  -5  -6  -8 3977.93  474.23
   5   6   9  226.28  220.87
  -5  -6  -9  272.56  249.02
   5   6  10 1588.10  351.24
  -5  -6 -10 1566.48  330.78
   5   6  11  146.81  172.11
  -5  -6 -11  168.91  262.49
   5   7  -4  258.34  350.43
  -5  -7   4  122.42  189.93
  -5  -7   4   82.45  170.61
   5   7  -3  653.81  334.48
  -5  -7   3  780.47  242.62
  -5  -7   3  644.46  371.78
   5   7  -2  522.76  344.53
  -5  -7   2  397.49  194.65
  -5  -7   2  367.35  324.83
   5   7  -1 1055.81  402.42
  -5  -7   1  848.43  226.22
  -5  -7   1  705.82  323.57
   5   7   0  633.40  360.76
  -5  -7   0  460.63  174.89
  -5  -7   0  488.03  319.52
   5   7   1  528.49  361.94
  -5  -7  -1  433.08  144.89
  -5  -7  -1  640.43  439.14
   5   7   2  139.59  294.24
  -5  -7  -2  186.59  386.40
   5   7   3  448.25  298.84
  -5  -7  -3  536.57  383.27
  -5  -7  -4   77.59  316.95
   5   7   5 1388.08  323.13
  -5  -7  -5 1201.61  372.81
   5   7   6  402.85  261.04
  -5  -7  -6  403.49  327.13
   5   7   7   30.74  166.12
  -5  -7  -7  -29.70  158.68
   5   7   8  457.01  276.73
  -5  -7  -8  397.33  302.38
   5   7   9  983.16  351.35
  -5  -7  -9  846.95  330.98
   5   8  -2  751.15  377.70
  -5  -8   2  448.43  197.70
  -5  -8   2  457.18  375.31
   5   8  -1  633.88  340.51
  -5  -8   1  570.97  208.97
  -5  -8   1  637.74  354.18
  -5  -8   0  221.33  189.26
  -5  -8   0  274.80  285.73
   5   8   1 1269.62  354.22
  -5  -8  -1 1161.48  392.22
   5   8   2  259.11  261.07
  -5  -8  -2  256.18  351.46
   5   8   3   51.00  173.71
  -5  -8  -3   30.22  179.93
   5   8   4  169.69  235.75
  -5  -8  -4   95.01  247.97
   5   8   5   47.72  167.36
  -5  -8  -5   75.49  303.58
   5   8   6 1751.71  349.11
  -5  -8  -6 1767.03  403.86
   5   8   7   36.75  135.64
  -5  -8  -7   74.28  263.94
   6  -5  -2 1465.64  294.23
   6  -5  -2 1393.91  287.27
   6  -5  -1 4467.33  623.99
   6  -5   0  390.33  205.99
   6  -5   1 3868.83  487.11
   6  -5   2 4717.87  568.06
   6  -5   3  271.46  254.12
   6  -5   4   11.64  155.26
   6  -5   5 1204.56  283.64
   6  -4  -4   80.03  212.34
   6  -4  -4   18.24  103.75
  -6   4   4   34.48  105.36
   6  -4  -3 1829.14  348.30
   6  -4  -3 1794.83  324.27
  -6   4   3 1566.42  361.26
   6  -4  -2 2090.54  339.22
   6  -4  -2 2269.14  316.38
  -6   4   2 1888.12  339.67
   6  -4  -1  103.94  175.70
   6  -4   0  290.59  201.95
   6  -4   1  602.61  197.50
   6  -4   2  584.76  225.17
   6  -4   3  111.63  229.06
   6  -4   4  272.37  247.53
   6  -4   5 2854.17  421.87
   6  -4   6  143.54  209.33
   6  -4   7  213.90  228.76
   6  -3  -5   13.44  129.28
   6  -3  -5  -13.53  113.64
  -6   3   5   30.65  188.69
   6  -3  -4   65.59  191.31
   6  -3  -4   74.09  177.20
  -6   3   4   58.77  164.38
   6  -3  -3   52.45  137.73
   6  -3  -3   38.61  117.81
  -6   3   3  152.41  214.10
   6  -3  -2   16.88  129.53
   6  -3  -2  -14.84   73.16
  -6   3   2   83.43  196.60
   6  -3  -1  394.39  233.80
  -6   3   1  335.87  218.61
   6  -3   0 2199.33  309.12
  -6   3   0 1862.37  293.92
   6  -3   1   54.16  242.92
  -6   3  -1   49.39  121.63
   6  -3   2 2257.09  332.98
  -6   3  -2 1914.92  279.42
   6  -3   3  125.53  225.51
   6  -3   4 6845.76  391.91
   6  -3   5  400.11  249.84
   6  -3   6    9.08  139.91
   6  -3   7  291.28  199.09
   6  -3   8   37.71  141.36
   6  -2  -5   98.20  187.47
   6  -2  -5   46.29   97.52
  -6   2   5  123.36  215.03
   6  -2  -4  891.49  273.74
   6  -2  -4  745.72  506.81
  -6   2   4  723.59  291.73
   6  -2  -3  295.29  253.58
   6  -2  -3  157.42  163.47
  -6   2   3  178.61  213.86
   6  -2  -2  128.15  178.43
   6  -2  -2   44.53   96.08
  -6   2   2  109.03  236.44
   6  -2  -1   48.82  133.86
  -6   2   1   88.82  194.49
   6  -2   0   91.94  209.73
  -6   2   0   33.57  104.52
   6  -2   1  -29.88  148.98
  -6   2  -1   43.44  153.46
   6  -2   2  834.50  234.73
  -6   2  -2  672.99  220.15
   6  -2   3 2899.30  362.24
  -6   2  -3 2587.40  340.51
   6  -2   4  719.90  229.44
  -6   2  -4  649.07  206.24
   6  -2   5  231.78  266.57
  -6   2  -5  251.36  165.95
   6  -2   6    5.82  149.78
   6  -2   7  567.70  212.82
   6  -2   8  128.46  190.06
   6  -2   9  170.53  191.63
   6  -1  -5  333.41  267.45
   6  -1  -5  171.14  188.36
  -6   1   5  202.83  256.82
   6  -1  -4  295.72  202.13
   6  -1  -4  226.23  277.95
  -6   1   4  221.52  293.33
   6  -1  -3   55.96  144.17
   6  -1  -3   -0.91   70.36
  -6   1   3    5.00  150.01
   6  -1  -2  114.75  205.66
   6  -1  -2   20.37   52.56
  -6   1   2   74.17  248.48
   6  -1  -1  242.88  230.58
  -6   1   1  167.34  283.08
   6  -1   0 2590.12  316.92
  -6   1   0 2243.19  434.49
   6  -1   1    1.30  148.24
  -6   1  -1   10.73  132.55
   6  -1   2 1268.08  308.49
  -6   1  -2 1079.73  280.42
   6  -1   3    6.53  168.08
  -6   1  -3   90.14  255.73
   6  -1   4 1338.82  313.04
  -6   1  -4 1215.27  256.01
   6  -1   5 6960.06  580.52
  -6   1  -5 6045.28  472.26
   6  -1   6  903.77  275.49
  -6   1  -6  786.57  182.74
   6  -1   7   71.51  202.93
  -6   1  -7   79.85  156.40
   6  -1   8  -13.93  157.11
  -6   1  -8   40.35  149.79
   6  -1   9   43.81  144.91
   6   0  -5  792.40  242.63
   6   0  -5  632.01  589.58
  -6   0   5  662.62  321.08
   6   0  -4  614.64  301.79
   6   0  -4  395.08  338.76
  -6   0   4  389.07  247.82
   6   0  -3  532.84  233.22
   6   0  -3  337.97  463.88
  -6   0   3  546.84  291.09
   6   0  -2  564.26  272.95
   6   0  -2  314.63  390.70
  -6   0   2  493.23  317.74
   6   0  -1  986.84  260.66
  -6   0   1  716.91  313.22
   6   0   0  145.20  223.01
  -6   0   0  194.10  261.18
   6   0   1 5239.56  437.15
  -6   0  -1 4222.41  505.52
   6   0   2  120.16  240.12
  -6   0  -2  111.97  253.80
   6   0   3   55.08  263.31
  -6   0  -3   36.05  145.29
   6   0   4   57.54  285.83
  -6   0  -4  120.47  277.40
   6   0   5  159.31  222.50
  -6   0  -5  157.08  159.37
   6   0   6  463.79  268.62
  -6   0  -6  430.31  203.94
   6   0   7  262.50  223.43
  -6   0  -7  175.29  164.85
   6   0   8  636.00  249.28
  -6   0  -8  652.00  204.07
   6   0   9 3489.96  504.64
  -6   0  -9 2976.01  449.46
   6   1  -5 1317.59  344.62
   6   1  -5 1114.94  337.68
  -6  -1   5 1316.15  463.38
   6   1  -4  254.11  189.49
   6   1  -4  173.73  193.25
  -6  -1   4  200.91  276.71
   6   1  -3  562.46  201.18
   6   1  -3  335.26  433.73
  -6  -1   3  440.26  296.71
   6   1  -211483.64  478.91
  -6  -1   2 9548.36  609.17
   6   1  -1 1691.04  342.52
  -6  -1   1 1452.49  356.40
   6   1   0 1897.40  310.30
  -6  -1   0 1577.59  394.66
   6   1   1 2280.44  343.60
  -6  -1  -1 1827.54  362.82
   6   1   2  780.06  300.31
  -6  -1  -2  694.88  344.78
   6   1   3  138.41  279.62
  -6  -1  -3   40.83  204.01
   6   1   4   28.23  193.56
  -6  -1  -4   20.66  216.89
   6   1   5  678.82  339.00
  -6  -1  -5  581.30  293.22
   6   1   6   75.83  166.05
  -6  -1  -6  100.79  228.51
   6   1   7   82.85  154.73
  -6  -1  -7   48.74  153.77
   6   1   8   55.85  217.18
  -6  -1  -8   18.91  131.56
   6   1   9   -2.80  139.09
  -6  -1  -9   -1.58   98.67
   6   2  -5  866.92  276.39
   6   2  -5  545.29  572.97
  -6  -2   5  869.01  417.53
   6   2  -4   59.95  251.95
   6   2  -4   35.26   41.53
  -6  -2   4   93.83  242.97
   6   2  -3 5133.51  596.99
   6   2  -3 4441.50  470.74
  -6  -2   3 4746.71  643.00
   6   2  -2  547.11  223.19
  -6  -2   2  561.78  249.69
   6   2  -1   26.94  145.52
  -6  -2   1   22.27  148.29
   6   2   0  416.22  250.28
  -6  -2   0  436.06  242.66
   6   2   1  484.63  244.13
  -6  -2  -1  332.08  264.79
   6   2   2  239.70  259.53
  -6  -2  -2   96.09  222.13
   6   2   3 1928.25  410.88
  -6  -2  -3 1462.13  377.95
   6   2   4 2368.81  452.90
  -6  -2  -4 2039.83  427.86
   6   2   5    4.78  179.02
  -6  -2  -5   76.88  260.99
   6   2   6   75.37  165.41
  -6  -2  -6   31.10  202.12
   6   2   7   50.27  226.91
  -6  -2  -7  106.79  225.33
   6   2   8  332.23  224.76
  -6  -2  -8  260.56  220.88
   6   2   9  135.97  193.04
  -6  -2  -9  126.98  181.91
   6   3  -4 1126.90  417.07
   6   3  -4  765.29  535.61
  -6  -3   4 1146.62  470.40
   6   3  -3  196.10  299.80
   6   3  -3   30.79   44.90
  -6  -3   3   84.50  223.58
   6   3  -2  212.62  188.96
  -6  -3   2  220.09  294.54
   6   3  -1  177.00  198.54
  -6  -3   1   70.57  137.07
   6   3   0  111.46  228.36
  -6  -3   0   73.02  222.93
   6   3   1  123.17  247.72
  -6  -3  -1  106.98  195.75
   6   3   2    6.05  190.67
  -6  -3  -2  103.36  253.12
   6   3   3  587.73  260.59
  -6  -3  -3  541.62  288.37
   6   3   4  296.16  288.82
  -6  -3  -4  134.97  210.07
   6   3   5  472.64  254.28
  -6  -3  -5  471.01  279.12
   6   3   6    7.24  157.45
  -6  -3  -6    2.40  143.37
   6   3   7 3235.45  440.44
  -6  -3  -7 2915.42  442.94
   6   3   8  301.87  232.21
  -6  -3  -8  258.11  262.68
   6   3   9   39.70  131.30
  -6  -3  -9   72.92  162.42
   6   4  -3 1800.46  429.90
  -6  -4   3 1567.46  435.49
   6   4  -2 1615.51  407.87
  -6  -4   2 1496.28  437.99
   6   4  -1   74.72  188.20
  -6  -4   1   33.58  149.81
   6   4   0  676.95  294.17
  -6  -4   0  583.75  267.97
   6   4   1  191.68  252.71
  -6  -4  -1  202.61  221.53
   6   4   2   36.43  186.12
  -6  -4  -2   60.01  241.74
   6   4   3   91.27  262.59
  -6  -4  -3   59.30  182.59
   6   4   4   36.26  169.15
  -6  -4  -4   10.97  137.01
   6   4   5 2340.85  371.92
  -6  -4  -5 2025.21  399.07
   6   4   6 1747.26  356.99
  -6  -4  -6 1720.17  379.84
   6   4   7  455.32  260.84
  -6  -4  -7  378.51  297.38
   6   4   8  101.89  148.42
  -6  -4  -8  153.83  278.36
   6   5  -1  689.79  324.25
  -6  -5   1  593.48  320.11
   6   5   0  181.32  235.75
  -6  -5   0  164.99  311.70
   6   5   1   71.56  205.92
  -6  -5  -1  115.63  293.14
   6   5   2   50.64  173.75
  -6  -5  -2  116.30  233.41
   6   5   3 3912.12  508.59
  -6  -5  -3 3827.63  558.45
   6   5   4  100.57  160.32
  -6  -5  -4  165.55  271.88
   6   5   5  257.77  271.22
  -6  -5  -5  299.42  308.59
   6   5   6   44.86  156.43
  -6  -5  -6   23.01  172.86
;

_shelx_hkl_checksum   61215

#==============================================================================
#     End of CIF
#==============================================================================
